# Supplementary material for: Cyclopamine analogs bearing exocyclic methylenes are highly potent and acid-stable inhibitors of hedgehog signaling
Source: publisher site journal article supplement (doi:10.3762/bjoc.9.267), 2013-10-31

**Supporting Information**  
**for**  
**Cyclopamine analogs bearing exocyclic methylenes are highly**  
**potent and acid-stable inhibitors of hedgehog signaling**

Johann Moschner<sup>1</sup>, Anna Chentsova<sup>1</sup>, Nicole Eilert<sup>1</sup>, Irene Rovardi<sup>1</sup>, Philipp Heretsch<sup>\*2</sup> and  
Athanasios Giannis<sup>\*1</sup>

Address: <sup>1</sup>Universität Leipzig, Institut für Organische Chemie, Johannisallee 29, D-04103  
Leipzig, Germany and <sup>2</sup>Rice University, Department of Chemistry, BioScience Research  
Collaborative, 6500 Main St., Houston, Texas 77030

Email: Philipp Heretsch - heretsch@rice.edu; giannis@uni-leipzig.de

\*Corresponding author

Experimental details and analytical data of all synthesized compounds are provided

Table of contents

|                                                                                                                                                                         |     |
|-------------------------------------------------------------------------------------------------------------------------------------------------------------------------|-----|
| 1. General Information .....                                                                                                                                            | S2  |
| 2. Synthesis overview .....                                                                                                                                             | S3  |
| 3. Experimental Procedures .....                                                                                                                                        | S5  |
| 3.1 (+)-25- <i>epi-exo</i> -cyclopamine <b>5</b> .....                                                                                                                  | S5  |
| 3.2 (+)- <i>N</i> -Bs-bis- <i>exo</i> -cyclopamine <b>24</b> .....                                                                                                      | S5  |
| 3.3 (-)-Bis- <i>exo</i> -cyclopamine <b>6</b> .....                                                                                                                     | S6  |
| 3.4 (-)- <i>O</i> -Bn- <i>exo</i> -C- <i>nor</i> -D- <i>homo</i> -azidolactol <b>25</b> .....                                                                           | S6  |
| 3.5 (-)- <i>O</i> -Bn- <i>exo</i> -C- <i>nor</i> -D- <i>homo</i> -azidoacetal <b>26</b> .....                                                                           | S7  |
| 3.6 (-)- <i>O</i> -Bn- <i>exo</i> -C- <i>nor</i> -D- <i>homo</i> -azidofuran <b>7</b> .....                                                                             | S7  |
| 3.7 (-)- <i>exo</i> -C- <i>nor</i> -D- <i>homo</i> -azidofuran <b>27</b> .....                                                                                          | S8  |
| 3.8 (-)- <i>exo</i> -C- <i>nor</i> -D- <i>homo</i> -aminofuran <b>8</b> .....                                                                                           | S8  |
| 3.9 (-)- <i>exo</i> -C- <i>nor</i> -D- <i>homo</i> -aminoalcohol <b>9</b> .....                                                                                         | S9  |
| 3.10 (-)-Alkene <b>11</b> and <b>epi-11</b> .....                                                                                                                       | S9  |
| 3.11 (-)-Diol <b>28</b> and <b>epi-28</b> .....                                                                                                                         | S10 |
| 3.12 (-)-Spirolactone <b>12</b> and (-)-20- <i>epi</i> -spirolactone <b>epi-12</b> .....                                                                                | S10 |
| 3.13 (-)-Hydroxylactone <b>29</b> .....                                                                                                                                 | S11 |
| 3.14 (-)- <i>exo</i> -C- <i>nor</i> -D- <i>homo</i> -lactone <b>13</b> and (-)- <i>endo</i> -C- <i>nor</i> -D- <i>homo</i> -lactone <b>30</b> .....                     | S11 |
| 3.15 (-)- <i>exo</i> -C- <i>nor</i> -D- <i>homo</i> -azidolactone <b>14</b> and (+)-21- <i>epi-exo</i> -C- <i>nor</i> -D- <i>homo</i> -azidolactone <b>epi-14</b> ..... | S12 |
| 3.16 (-)- <i>exo</i> -C- <i>nor</i> -D- <i>homo</i> -azidolactol <b>31</b> .....                                                                                        | S13 |

|                                                                                                                 |     |
|-----------------------------------------------------------------------------------------------------------------|-----|
| 3.17 (-)-Furan <b>15</b> .....                                                                                  | S13 |
| 3.18 (-)-Alkene <b>16</b> .....                                                                                 | S14 |
| 3.19 (-)-Sulfonamide <b>17</b> .....                                                                            | S15 |
| 3.20 (+)-Allylic alcohol <b>32</b> .....                                                                        | S16 |
| 3.21 (-)- <i>N</i> -Bs- <i>O</i> -Bn-20-demethyl-bis- <i>exo</i> -cyclopamine <b>18</b> .....                   | S16 |
| 3.22 (-)- <i>N</i> -Bs-20-demethyl-bis- <i>exo</i> -cyclopamine <b>33</b> .....                                 | S17 |
| 3.23 (-)-20-Demethyl-bis- <i>exo</i> -cyclopamine <b>19</b> .....                                               | S17 |
| 3.24 (-)-Furan <b>20</b> .....                                                                                  | S18 |
| 3.25 (+)-Sulfonamide <b>21</b> .....                                                                            | S19 |
| 3.26 (+)-Alcohol <b>34</b> .....                                                                                | S19 |
| 3.27 (+)- <i>N</i> -Bs- <i>O</i> -Bn-F- <i>nor</i> -20,25-bis-demethyl- <i>exo</i> -cyclopamine <b>22</b> ..... | S20 |
| 3.28 (+)- <i>N</i> -Bs-F- <i>nor</i> -20,25-bis-demethyl- <i>exo</i> -cyclopamine <b>35</b> .....               | S20 |
| 3.29 (-)-F- <i>nor</i> -20,25-bis-demethyl- <i>exo</i> -cyclopamine <b>23</b> .....                             | S21 |
| 4. Biochemistry .....                                                                                           | S22 |
| 5. References .....                                                                                             | S23 |
| 6. NMR Spectra .....                                                                                            | S24 |

## 1. General Information

**General procedures.** All reactions were run under an atmosphere of argon unless otherwise indicated. Room temperature refers to 22 °C, ambient pressure to 1013 hPa.

Reagents and anhydrous solvents were transferred via oven-dried syringe or cannula. Flasks were flame-dried under vacuum and cooled under a constant stream of argon.

Tetrahydrofuran was distilled under argon from potassium, dichloromethane from SICAPENT (phosphorus pentoxide on solid support with indicator), ethanol from magnesium ethoxide and diisopropyl amine and triethylamine from calcium hydride. Benzene, toluene, 1,2-dimethoxyethane, 1,2-dichloroethane, acetone, acetonitrile and pyridine were purchased from Acros or Sigma-Aldrich (anhydrous over molecular sieves).

All other chemicals were purchased from ABCR, Acros, Sigma-Aldrich, Alfa Aesar, Fluorochem, Merck and TCI Europe at highest commercially available purity and used as such.

Reactions were monitored by thin-layer chromatography using Merck silica gel 60 F<sub>254</sub> TLC aluminium sheets and visualized with ceric ammonium molybdate, potassium permanganate or vanillin staining solution. Chromatographic purification was performed as flash chromatography on Acros silica gel 35–70, 60 Å, using a forced flow of eluent (method of Still) or as preparative TLC on Merck silica gel 60 F<sub>254</sub> glass plates with concentration zone. Concentration under reduced pressure was performed by rotary evaporation at 40 °C at the appropriate pressure.

Yields refer to chromatographically purified and spectroscopically pure compounds.

NMR spectra were recorded on a Bruker Avance 700 (operating at 700 MHz for <sup>1</sup>H and 175 MHz for <sup>13</sup>C), Varian Mercury plus 400 (operating at 400 MHz for <sup>1</sup>H and 100 MHz for <sup>13</sup>C) and a Varian Mercury plus 300 (operating at 300 MHz for <sup>1</sup>H and 75 MHz for <sup>13</sup>C acquisitions). Chemical shifts  $\delta$  are reported in ppm with the solvent resonance as the internal standard (*d*<sub>1</sub>-chloroform: 7.260 (<sup>1</sup>H NMR), 77.16 (<sup>13</sup>C NMR); *d*<sub>4</sub>-methanol: 3.310 (<sup>1</sup>H NMR), 49.00 (<sup>13</sup>C NMR)). Coupling constants *J* are reported in Hertz (Hz). Multiplicities are classified by the following abbreviations: s = singlet, d = doublet, t = triplet, q = quartet, p = quintet and combinations thereof, or m = multiplet or br = broad signal.

Where 2D-spectra were recorded and allowed complete assignment of all hydrogen and carbon-atoms of a compound, spectral data include this assignment using common steroid numbering. Where this is not the case, all hydrogen signals below 2 ppm are omitted and only methyl groups and isolated signals in this range are listed. All spectra can be found as copies at the end of the experimental section.

High resolution mass spectra were obtained on a Bruker Daltonics ESI-FT-ICR-MS APEX II. IR spectra were obtained on an ATI/MATTSON Genesis FT-IR and JASCO FT/IR-4100typeA as thin film (in  $\text{CCl}_4$ ) or KBr disk. Absorbance frequencies are reported in reciprocal centimetres ( $\text{cm}^{-1}$ ).

Melting points were measured on a Boetius-micro hot stage and are uncorrected.

Optical rotation data was obtained with a Schmidt+Haensch Polartronic MHZ-8 at the sodium-D line (589 nm) using a 50 mm path-length cell and solvents and concentrations as indicated.

## 2. Synthesis overview

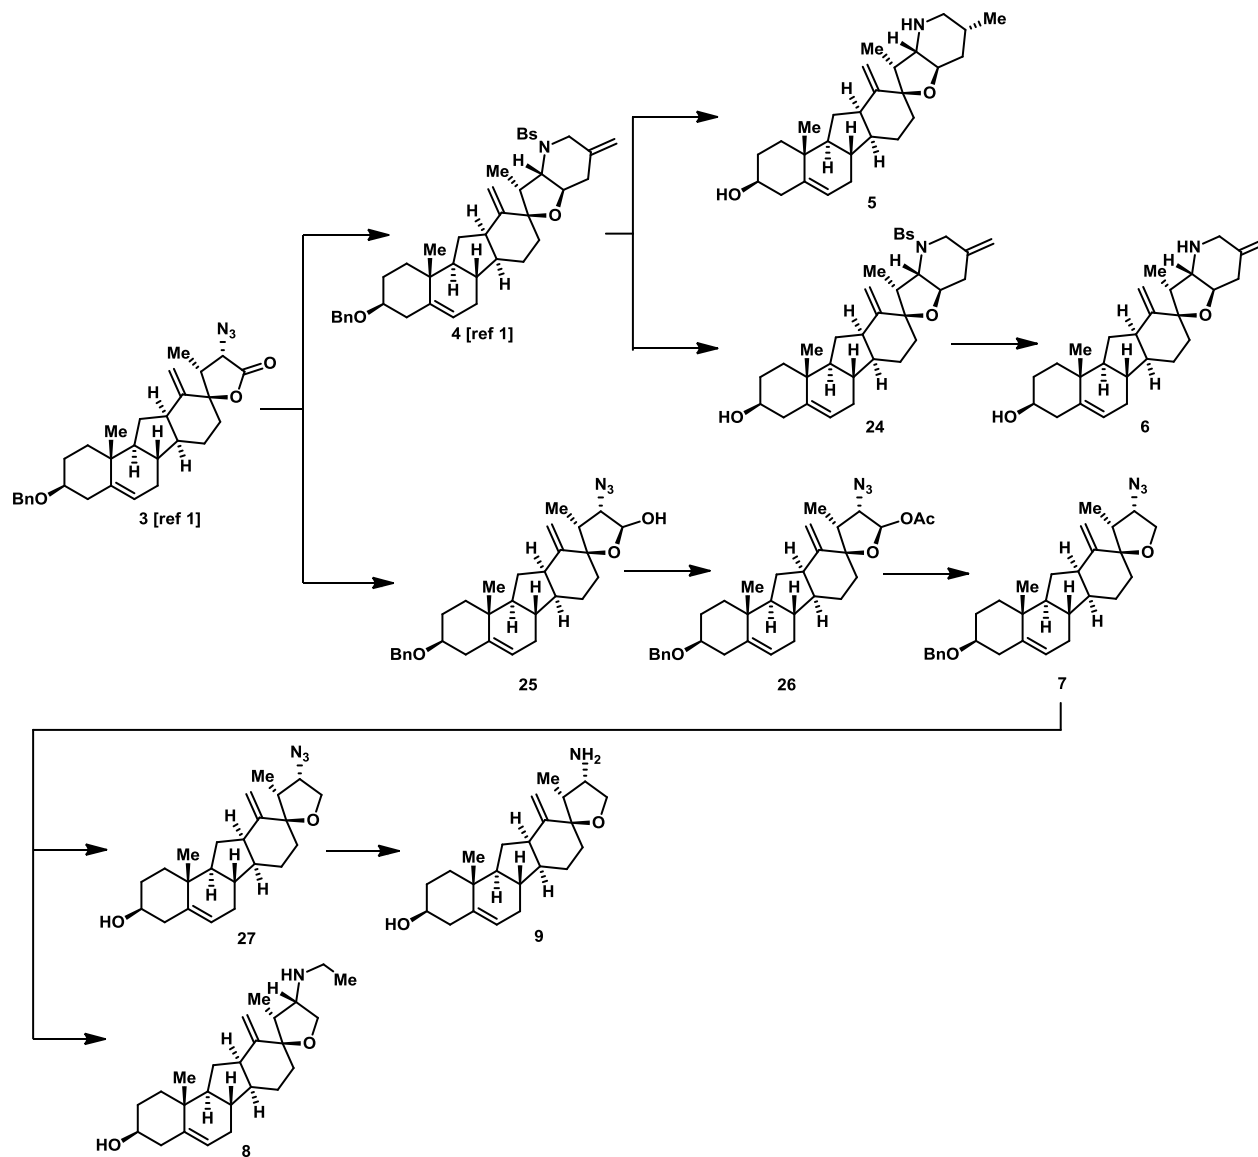

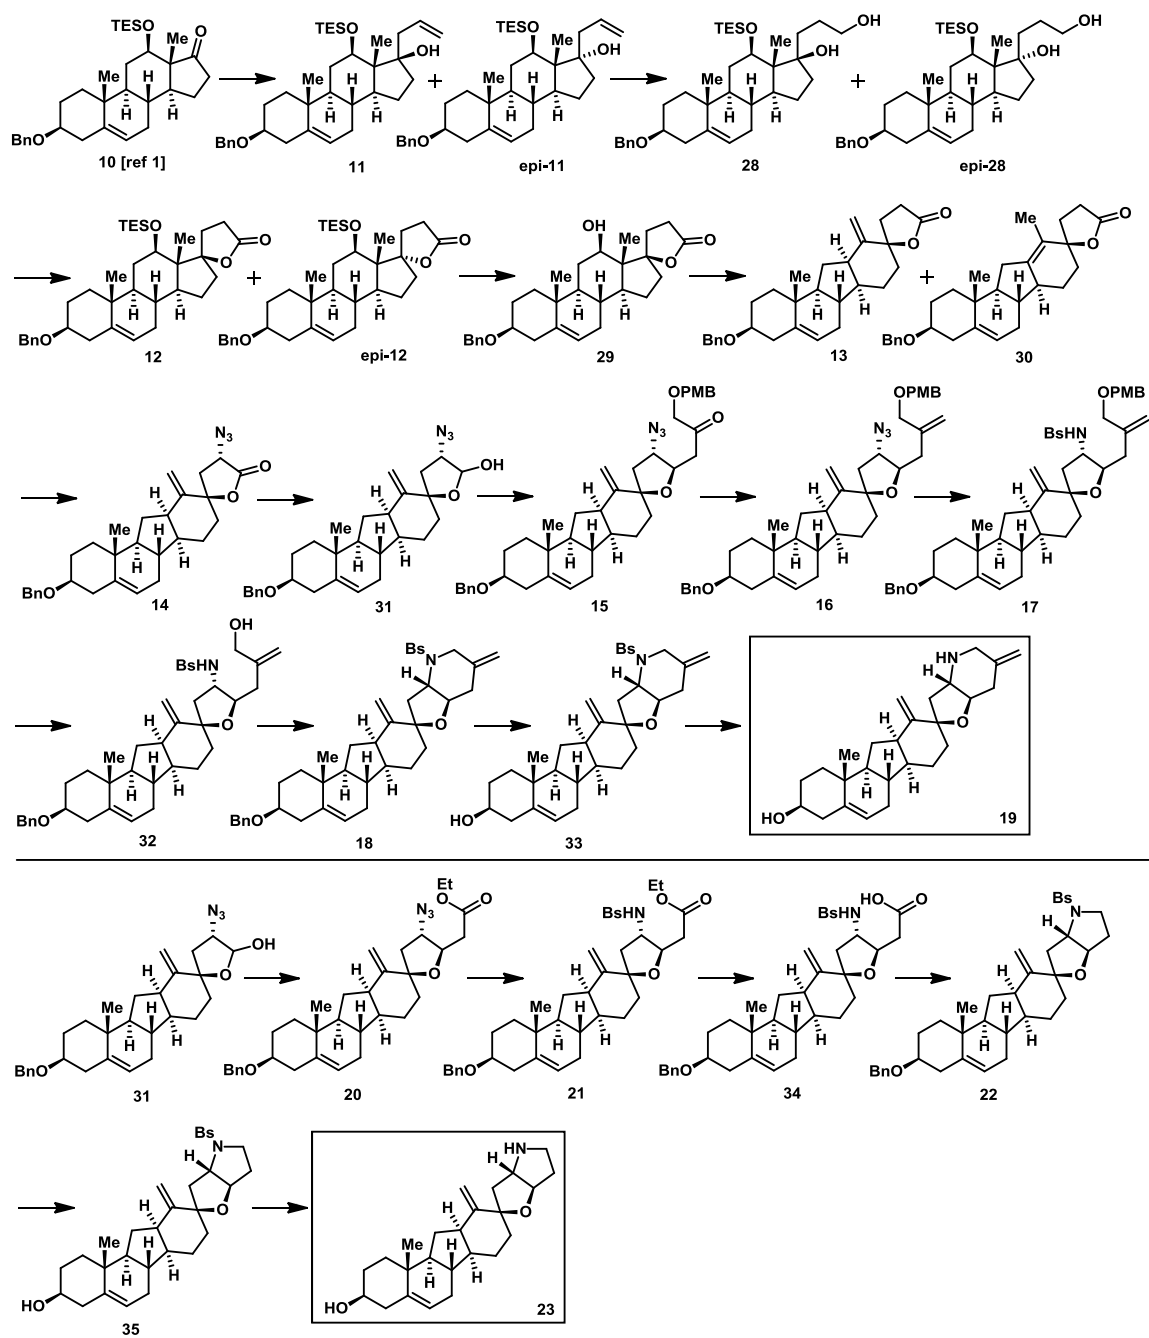



### 3. Experimental Procedures

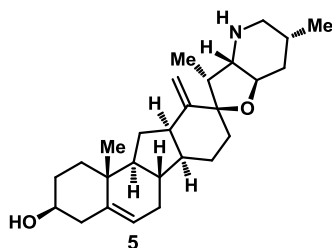

#### 3.1 (+)-25-epi-exo-cyclopamine **5**

To a solution of 25-epi-*N*-Bs-*O*-Bn-*exo*-cyclopamine [1] (10.2 mg, 15.8  $\mu\text{mol}$ ) in EtOH (1 mL) freshly prepared Raney-nickel (W2) (app. 0.25 g) in EtOH (2 mL) was added and the suspension was heated to reflux under vigorous stirring for 5 min. The mixture was allowed to cool to room temperature, filtered through Celite and washed with EtOH (4 x 5 mL). The solvent was removed under reduced pressure, the crude material was redissolved in  $\text{CH}_2\text{Cl}_2$  (2 mL) and filtered (paper), washing several times with  $\text{CH}_2\text{Cl}_2$ . The crude 25-epi-*N*-Bs-*exo*-cyclopamine was dried in vacuum for 12 h and then was redissolved in 1,2-dimethoxyethane (1 mL) and cooled to  $-78^\circ\text{C}$  under stirring. To this a solution of freshly prepared sodium naphthalenide (0.5 M in dimethoxyethane, 250  $\mu\text{L}$ , 125  $\mu\text{mol}$ ) was added dropwise and stirring at this temperature was continued for 30 min. Then, saturated aqueous  $\text{NaHCO}_3$  solution (5 mL) was introduced, the suspension was allowed to warm to room temperature and was extracted with  $\text{CH}_2\text{Cl}_2$  (5 x 5 mL). The combined organic extracts were dried ( $\text{Na}_2\text{SO}_4$ ), and all volatiles were removed under reduced pressure. Column chromatography ( $\text{SiO}_2$ ;  $\text{CHCl}_3/\text{EtOH}/\text{NH}_3$  (25% aq.), 95:5:0.5 v/v/v) yielded pure compound **5** (2.6 mg, 6.5  $\mu\text{mol}$ , 41% over two steps) as a waxy solid. m.p.:  $210\text{--}215^\circ\text{C}$ ; TLC ( $\text{CHCl}_3/\text{EtOH}/\text{NH}_3$ (25% aq.), 95:5:0.5, v/v/v):  $R_F = 0.18$ ;  $[\alpha]_D^{22}$  ( $\text{deg cm}^3 \text{ g}^{-1} \text{ dm}^{-1}$ ) = +42 ( $c = 0.0015 \text{ g cm}^{-3}$  in  $\text{CH}_2\text{Cl}_2$ ); IR (KBr):  $\nu_{\text{max}}$  3420, 2950, 1648, 1458, 1376, 1350, 1170, 1106, 1060, 1039, 987, 908, 799  $\text{cm}^{-1}$ ;  $^1\text{H}$  NMR (400 MHz,  $\text{CDCl}_3$ )  $\delta$  5.38 (m, 2 H, H-6, H-18), 4.93 (s, 1 H, H-18), 3.68 (dt,  $J = 11.0, 5.0 \text{ Hz}$ , 1 H, H-23), 3.52 (m, 1 H, H-3), 3.51 (m, 1 H, H-26), 2.86 (m, 1 H, H-12), 2.85 (m, 1 H, H-20), 2.70 (m, 1 H, H-22), 2.68 (m, 1 H, H-26), 2.36 (m, 1 H, H-4), 2.34 (m, 1 H, H-4), 2.27 (m, 1 H, H-7), 2.24 (m, 1 H, H-2), 2.17 (m, 1 H, H-16), 2.06 (m, 1 H, H-11), 1.77 (m, 2 H, H-1, H-25), 1.73 (m, 3 H, H-11, H-15, H-24), 1.65 (m, 1 H, H-14), 1.64 (m, 2 H, H-1, H-16), 1.60 (m, 1 H, H-7), 1.55 (m, 1 H, H-2), 1.48 (m, 1 H, H-15), 1.43 (m, 1 H, H-24), 1.36 (m, 1 H, H-9), 1.33 (m, 1 H, H-8), 1.16 (td,  $J = 13.7, 4.1 \text{ Hz}$ , 1 H, H-1), 1.08 (d,  $J = 6.8 \text{ Hz}$ , 3 H, H-21), 1.04 (d,  $J = 6.8 \text{ Hz}$ , 3 H, H-27), 0.99 (s, 3 H, H-19);  $^{13}\text{C}$  NMR (75 MHz,  $\text{CDCl}_3$ )  $\delta$  154.9 (C-13), 141.9 (C-5), 122.2 (C-6), 108.5 (C-18), 88.0 (C-17), 76.4 (C-3), 72.1 (C-23), 64.1 (C-22), 53.7 (C-26), 52.5 (C-9), 47.5 (C-14), 41.9 (C-12), 40.9 (C-20), 38.7 (C-4), 38.4 (C-1), 37.1 (C-8), 36.5 (C-10), 36.4 (C-24), 32.4 (C-16), 31.6 (C-7), 31.6 (C-2), 29.1 (C-25), 26.3 (C-11), 23.8 (C-15), 19.1 (C-19), 18.7 (C-27), 10.1 (C-21); ESI-HRMS ( $m/z$ ):  $[\text{M}+\text{H}]^+$  calcd for  $\text{C}_{27}\text{H}_{42}\text{NO}_2$ : 412.32101, found: 412.32132.

#### 3.2 (+)-*N*-Bs-bis-*exo*-cyclopamine **24**

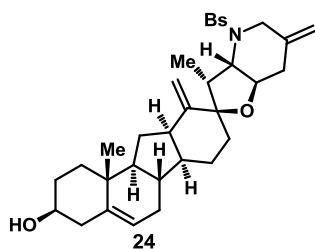

To a solution of 25-epi-*N*-Bs-*O*-Bn-bis-*exo*-cyclopamine [1] (11.1 mg, 17.3  $\mu\text{mol}$ ) in 1,2-dichloroethane (1.4 mL) and phosphate buffer (0.17 mL, pH 7) was added 2,3-dichloro-5,6-dicyano-1,4-benzoquinone (33.8 mg, 148.9  $\mu\text{mol}$ ) at  $40^\circ\text{C}$  and stirring was continued for 95 min. The reaction mixture was quenched with saturated aqueous  $\text{NaHCO}_3$  solution and cooled down to room temperature. The aqueous phase was extracted with  $\text{CH}_2\text{Cl}_2$  (3 x 5 mL), the combined organic layers were washed with brine (3 mL), dried ( $\text{MgSO}_4$ ) and all volatiles were removed under reduced pressure. Column chromatography ( $\text{SiO}_2$ ; *n*-hexane/EtOAc, 5:1  $\rightarrow$  2:1 v/v) yielded pure **24** (8.2 mg, 14.9  $\mu\text{mol}$ , 86%) as a waxy solid; mp.:  $187\text{--}190^\circ\text{C}$ ; TLC (*n*-hexane/EtOAc, 2:1 v/v):  $R_F = 0.26$ ;  $[\alpha]_D^{22}$  ( $\text{deg cm}^3 \text{ g}^{-1} \text{ dm}^{-1}$ ) = +19 ( $c = 0.0069 \text{ g cm}^{-3}$  in  $\text{CHCl}_3$ ); IR (KBr):  $\nu_{\text{max}}$  3434, 1635, 1356, 1171, 810, 603, 576  $\text{cm}^{-1}$ ;

$^1\text{H}$  NMR (300 MHz,  $\text{CDCl}_3$ )  $\delta$  7.70 (d,  $J = 7.2$  Hz, 2 H, ortho-H Bs), 7.62 (t,  $J = 7.2$  Hz, 1 H, para-H Bs), 7.51 (t,  $J = 7.2$  Hz, 2 H, meta-H Bs), 5.36 (m, 1H), 5.13 (m, 1H), 4.98 (m, 1H), 4.92 (m, 1H), 4.87 (m, 1H), 3.99 (d,  $J = 12.6$  Hz, 1H), 3.86 (ddd,  $J = 11.9, 9.9, 4.7$  Hz, 1H), 3.53 (m, 1H), 2.88 (m, 1H), 2.85 (m, 1H), 2.73 (dd,  $J = 12.6, 4.7$  Hz, 1H), 2.66 (dd,  $J = 9.9, 5.1$  Hz, 1H), 2.37 (ddd,  $J = 13.0, 4.9, 2.2$  Hz, 1H), 2.23 (m, 1H), 2.11 (m, 1H), 1.33 (d,  $J = 6.7$  Hz, 2H), 0.98 (s, 1H);  $^{13}\text{C}$  NMR (100 MHz,  $\text{CDCl}_3$ )  $\delta$  154.0, 141.8, 137.4, 133.8 (ipso-C Bs), 133.5 (para-C Bs), 129.0 (meta-C Bs), 128.6 (ortho-C Bs), 112.2, 115.9, 108.8, 89.2, 74.6, 72.0, 62.7, 54.2, 53.7, 46.8, 42.1, 41.9, 40.6, 38.4, 37.8, 37.7, 37.2, 32.3, 31.5, 30.9, 26.0, 23.3, 19.2, 9.7; ESI-HRMS ( $m/z$ ):  $[\text{M}+\text{Na}]^+$  calcd for  $\text{C}_{33}\text{H}_{43}\text{O}_4\text{SNa}$ : 572.28050, found: 572.28063.

### 3.3 (–)-Bis-*exo*-cyclopamine **6**

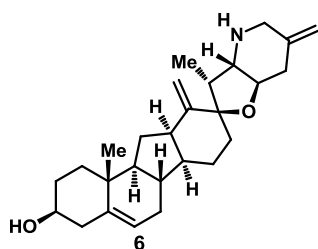

*N*-Bs-bis-*exo*-cyclopamine **24** (6.8 mg, 12.3  $\mu\text{mol}$ ) was dissolved in 1,2-dimethoxyethane (1 mL) and cooled to  $-78^\circ\text{C}$  under stirring. A solution of freshly prepared sodium naphthalenide (0.5 M in dimethoxyethane, 250  $\mu\text{L}$ , 125  $\mu\text{mol}$ ) was added dropwise and stirring at this temperature was continued for 1 h. Then, saturated aqueous  $\text{NaHCO}_3$  solution (5 mL) was introduced, the suspension was allowed to warm to room temperature, and was extracted with  $\text{CH}_2\text{Cl}_2$  (5 x 5 mL). The combined organic extracts were dried ( $\text{Na}_2\text{SO}_4$ ), and all volatiles were removed under reduced pressure. Column chromatography ( $\text{SiO}_2$ ;  $\text{CHCl}_3/\text{EtOH}/\text{NH}_3$  (25% aq.), 100:0:0.5  $\rightarrow$  99:1:0.5 v/v/v) yielded pure **6** (4.0 mg, 9.8  $\mu\text{mol}$ , 79%) as a colorless solid; mp.:  $230\text{--}233^\circ\text{C}$ ; TLC ( $\text{CHCl}_3/\text{EtOH}/\text{NH}_3$  (25% aq.), 95:5:0.5, v/v/v):  $R_F = 0.35$ ;  $[\alpha]_D^{25}$  ( $\text{deg cm}^3 \text{ g}^{-1} \text{ dm}^{-1}$ ) =  $-22$  ( $c = 0.0023 \text{ g cm}^{-3}$  in  $\text{CHCl}_3$ ); IR (KBr):  $\nu_{\text{max}}$  3678, 3290, 2925, 2854, 1638, 1458, 1060, 901  $\text{cm}^{-1}$ ;  $^1\text{H}$  NMR (300 MHz,  $\text{CDCl}_3$ )  $\delta$  5.37 (s, 1 H, H-18), 5.34 (m, 1H, H-6), 4.96 (s, 1H, H-18), 4.88 (s, 1 H, H-27), 4.85 (s, 1H, H-27), 3.49 (m, 1H, H-3), 3.48 (m, 1H, H-26), 3.45 (m, 1H, H-23), 3.25 (d,  $J = 13.8$  Hz, 1H, H-26), 2.93 (dd,  $J = 9.9, 6.6$  Hz, 1H, H-22), 2.89 (dd,  $J = 12.6, 4.5$ , 1H, H-24), 2.70 (td,  $J = 8.5, 5.6$  Hz, 1H, H-12), 2.35 (m, 1H, H-4), 2.34 (m, 1H, H-24), 2.26 (m, 1H, H-20), 2.22 (m, 1H, H-4), 2.12 (m, 1H, H-7), 1.84 (m, 1H, H-16), 1.83 (m, 1H, H-2), 1.78 (m, 1H, H-11), 1.75 (m, 1H, H-1), 1.74 (m, 1H, H-11), 1.73 (m, 1H, H-15), 1.66 (m, 1H, H-16), 1.62 (m, 1H, H-7), 1.61 (m, 1H, H-14), 1.52 (m, 1H, H-2), 1.39 (m, 1H, H-15), 1.34 (m, 2H, H-9, H-8), 1.17 (m, 1H, H-1), 1.01 (d,  $J = 7.6$  Hz, 3H, H-21), 0.99 (s, 3H, H-19);  $^{13}\text{C}$  NMR (75 MHz,  $\text{CDCl}_3$ )  $\delta$  154.7 (C-13), 143.7 (C-25), 141.9 (C-5), 122.2 (C-6), 112.8 (C-27), 108.6 (C-18), 89.2 (C-17), 77.3 (C-23), 72.0 (C-3), 63.1 (C-22), 53.7 (C-9), 53.4 (C-26), 47.3 (C-14), 41.9 (C-4), 41.3 (C-12), 40.4 (C-24), 40.3 (C-20), 38.6 (C-8), 38.4 (C-1), 37.2 (C-10), 32.4 (C-16), 31.6 (C-2), 31.0 (C-7), 26.3 (C-11), 23.7 (C-15), 19.1 (C-19), 9.8 (C-21); ESI-HRMS ( $m/z$ ):  $[\text{M}+\text{Na}]^+$  calcd for  $\text{C}_{27}\text{H}_{39}\text{NO}_2\text{Na}$ : 432.28730, found 432.28762.

### 3.4 (–)-*O*-Bn-*exo*-C-*nor*-D-*homo*-azidolactol **25**

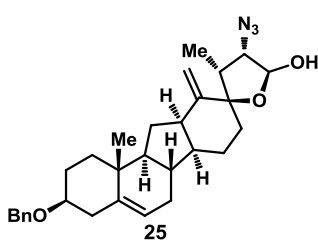

To a stirred solution of *exo*-C-*nor*-D-*homo*-azidolactone **3** [1] (500 mg, 0.410 mmol) in THF (5 mL) at  $-78^\circ\text{C}$  was dropwise added diisobutylaluminumhydride (1.2 M in toluene; 1.70 mL, 2.05 mmol) and stirring was continued at this temperature for 1 h and then at  $-65^\circ\text{C}$  for 4 h. The reaction mixture was quenched with MeOH (0.2 mL) and Rochelle-salt solution (10 wt % in  $\text{H}_2\text{O}$ ) (20 mL), diluted with  $\text{CH}_2\text{Cl}_2$  (20 mL) and warmed to room temperature. After stirring for 1 h the phases were separated and the aqueous layer was extracted with  $\text{CH}_2\text{Cl}_2$

(2 x 20 mL). The combined organic extracts were dried (MgSO<sub>4</sub>) and the solvents were evaporated under reduced pressure. Purification by column chromatography (SiO<sub>2</sub>; *n*-hexane/EtOAc, 15:1 v/v) yielded pure **25** (190 mg, 0.388 mmol, 95%) as a colorless foam; m.p. 90-95°C; TLC (*n*-hexane/EtOAc, 3:1 v/v): *R*<sub>F</sub> = 0.52; [ $\alpha$ ]<sub>D</sub><sup>22</sup> (deg cm<sup>3</sup> g<sup>-1</sup> dm<sup>-1</sup>) = -32 (*c* = 0.0050 g cm<sup>-3</sup> in CHCl<sub>3</sub>); IR (KBr):  $\nu_{\max}$  2101, 750, 698 cm<sup>-1</sup>; <sup>1</sup>H NMR (300 MHz, CDCl<sub>3</sub>)  $\delta$  7.36-7.23 (m, 5 H), 5.53 (m, 1 H), 5.36 (m, 2 H), 5.01 (s, 1 H), 4.57 (s, 2 H), 3.98 (dd, *J* = 5.7, 2.6 Hz, 1 H), 3.28 (tt, *J* = 11.3, 4.5 Hz, 1 H), 3.15 (d, *J* = 4.0 Hz, 1 H), 2.68 (m, 1 H), 2.57 (m, 1 H), 2.49 (ddd, *J* = 13.2, 4.6, 2.1 Hz, 1 H), 2.26 (m, 1 H), 2.14 (m, 1 H), 1.11 (d, *J* = 7.2 Hz, 3 H), 1.00 (s, 3 H); <sup>13</sup>C NMR (75 MHz, CDCl<sub>3</sub>)  $\delta$  153.7, 142.0, 139.2, 128.5, 127.7, 127.6, 122.1, 110.2, 99.8, 90.0, 78.8, 70.7, 70.1, 53.9, 46.6, 43.8, 42.1, 40.4, 38.7, 38.4, 37.4, 32.5, 31.5, 28.3, 28.3, 24.1, 19.0, 10.2; ESI-HRMS (*m/z*): [M+Na]<sup>+</sup> calcd for C<sub>30</sub>H<sub>39</sub>N<sub>3</sub>O<sub>3</sub>Na: 512.28836, found: 512.28800, [2M+Na]<sup>+</sup> calcd for C<sub>60</sub>H<sub>78</sub>N<sub>6</sub>O<sub>6</sub>Na: 1001.58751, found: 1001.58682.

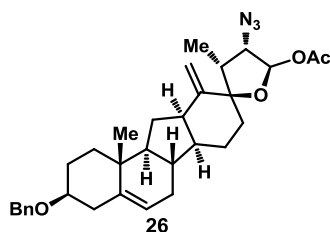

### 3.5 (-)-*O*-Bn-*exo*-C-*nor*-D-*homo*-azidoacetal **26**

To a solution of azidolactol **25** (112.0 mg, 228.9  $\mu$ mol) and DMAP (3 mg, 24  $\mu$ mol) in pyridine (1.5 mL) acetic anhydride (26  $\mu$ L, 287.1  $\mu$ mol) was added dropwise at room temperature and stirred for 20 h. The reaction mixture was diluted with saturated aqueous NH<sub>4</sub>Cl solution (5 mL). The aqueous phase was extracted with EtOAc (3 x 5 mL), the combined organic extracts were washed with brine (10 mL), dried (MgSO<sub>4</sub>) and all volatiles were removed under

reduced pressure. Column chromatography (SiO<sub>2</sub>; *n*-hexane/EtOAc, 8:1 v/v) yielded pure **26** (121.7 mg, 228.9  $\mu$ mol, quant.) as colorless crystals; mp.: 103-105°C; TLC (*n*-hexane/EtOAc, 5:1 v/v): *R*<sub>F</sub> = 0.46; [ $\alpha$ ]<sub>D</sub><sup>22</sup> (deg cm<sup>3</sup> g<sup>-1</sup> dm<sup>-1</sup>) = -14 (*c* = 0.0101 g cm<sup>-3</sup> in CHCl<sub>3</sub>); IR (KBr):  $\nu_{\max}$  2932, 2105, 1734, 1233, 1110, 733, 696 cm<sup>-1</sup>; <sup>1</sup>H NMR (400 MHz, CDCl<sub>3</sub>)  $\delta$  7.36 (m, 2 H, ortho-H Bn), 7.34 (m, 2 H, meta-H Bn), 7.28 (m, 1 H, para-H Bn), 6.19 (d, *J* = 2.1 Hz, 1 H), 5.38 (s, 2H), 5.00 (s, 1 H), 4.60 (s, 2 H), 4.11 (dd, *J* = 5.6, 2.1 Hz, 1 H), 3.31 (tt, *J* = 9.8, 7.9, 3.7 Hz, 1 H), 2.70 (m, 1 H), 2.57 (m, 1 H), 2.52 (m, 1 H), 2.30 (m, 1 H), 2.16 (m, 1 H), 2.13 (s, 3 H), 1.99 (m, 2 H), 1.18 (d, *J* = 7.2 Hz, 4 H), 1.02 (s, 3 H); <sup>13</sup>C NMR (100 MHz, CDCl<sub>3</sub>)  $\delta$  170.2, 153.2, 141.9, 139.1 (ipso-C Bn), 128.5 (meta-C Bn), 127.7 (ortho-C Bn), 127.5 (para-C Bn), 122.1, 109.7, 99.1, 91.4, 78.7, 70.0, 69.7, 53.7, 46.6, 44.1, 41.8, 40.6, 38.7, 38.3, 37.3, 32.4, 31.5, 28.3, 28.2, 24.2, 21.4, 19.0, 10.2; ESI-HRMS (*m/z*): [M+Na]<sup>+</sup> calcd for C<sub>32</sub>H<sub>41</sub>N<sub>3</sub>O<sub>4</sub>Na: 554.29893, found 554.29878.

### 3.6 (-)-*O*-Bn-*exo*-C-*nor*-D-*homo*-azidofuran **7**

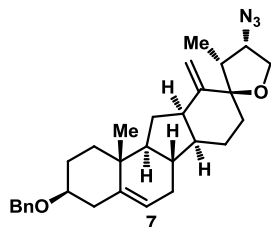

To a solution of azidoacetal **26** (74.2 mg, 139.6  $\mu$ mol) in CH<sub>2</sub>Cl<sub>2</sub> (3.7 mL) were added triethylsilane (61.0  $\mu$ L, 340.7  $\mu$ mol) and boron trifluoride diethyl etherate (25.5  $\mu$ L, 163.5  $\mu$ mol) at -78 °C. The mixture was stirred for 30 min at -78 °C and for 6 h at -20 °C. Saturated aqueous NH<sub>4</sub>Cl solution (5 mL) was added and the mixture was allowed to warm to room temperature and was stirred for 15 min. The aqueous phase was extracted with EtOAc (2 x 5 mL), the combined extracts were

washed with brine (5 mL), dried (MgSO<sub>4</sub>) and all volatiles were removed under reduced pressure. Column chromatography (SiO<sub>2</sub>; *n*-hexane/EtOAc, 20:1 v/v) yielded pure **7** (52.2 mg, 110.3  $\mu$ mol, 79%) as a waxy solid; mp.: 72-74°C; TLC (*n*-hexane/EtOAc, 20:1 v/v): *R*<sub>F</sub> = 0.33, [ $\alpha$ ]<sub>D</sub><sup>22</sup> (deg cm<sup>3</sup> g<sup>-1</sup> dm<sup>-1</sup>) = -32 (*c* = 0.0112 g cm<sup>-3</sup> in CHCl<sub>3</sub>); IR (CCl<sub>4</sub>):  $\nu_{\max}$  2954, 2111, 1387, 1278, 1095, 789, 698 cm<sup>-1</sup>, <sup>1</sup>H NMR (400 MHz, CDCl<sub>3</sub>)  $\delta$  7.37 (m,

2 H, ortho-H Bn), 7.35 (m, 2 H, meta-H Bn), 7.29 (m, 1 H, para-H Bn), 5.38 (m, 1 H), 5.23 (m, 1 H), 4.96 (m, 1 H), 4.59 (s, 2 H), 4.19 (m, 2 H), 3.78 (m, 1 H), 3.31 (tt,  $J = 11.2, 4.5$  Hz, 1 H), 2.71 (m, 1 H), 2.52 (ddd,  $J = 13.2, 4.7, 2.2$  Hz, 1 H), 2.39 (p,  $J = 6.9$  Hz, 1 H), 2.29 (m, 1 H), 2.17 (m, 1 H), 1.99 (m, 1 H), 1.12 (d,  $J = 7.1$  Hz, 3 H), 1.03 (s, 3 H);  $^{13}\text{C}$  NMR (100 MHz,  $\text{CDCl}_3$ )  $\delta$  153.2, 142.1, 139.2 (ipso-C Bn), 128.5 (meta-C Bn), 127.7 (ortho-C Bn), 127.5 (para-C Bn), 122.1, 108.3, 88.0, 78.8, 70.1, 69.1, 64.7, 53.9, 46.5, 44.6, 42.0, 39.9, 38.7, 37.5, 31.4, 30.6, 28.3, 27.7, 24.2, 19.0, 10.0; ESI-HRMS ( $m/z$ ):  $[\text{M}+\text{Na}]^+$  calcd for  $\text{C}_{30}\text{H}_{39}\text{N}_3\text{O}_2\text{Na}$ : 496.29345, found 496.29377;  $[2\text{M}+\text{Na}]^+$  calcd for  $\text{C}_{60}\text{H}_{78}\text{N}_6\text{O}_4\text{Na}$ : 969.59768, found: 969.59837.

### 3.7 (–)-*exo*-C-nor-D-homo-azidofuran **27**

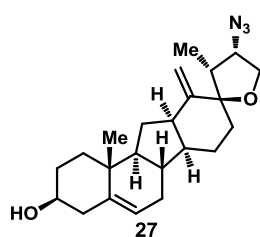

To a mixture of azidofuran **7** (34.5 mg, 72.8  $\mu\text{mol}$ ) in 1,2-dichloroethane (6 mL) and phosphate buffer (pH 7, 740  $\mu\text{L}$ ) was added 2,3-dichloro-5,6-dicyano-1,4-benzoquinone (137.0 mg, 603.5  $\mu\text{mol}$ ) in one portion at 45 °C. After stirring for 90 min at 45 °C the reaction mixture was quenched with saturated aqueous  $\text{NaHCO}_3$  solution and cooled down to room temperature. The aqueous phase was extracted with  $\text{CH}_2\text{Cl}_2$  (3 x 5 mL), the combined organic layers were dried ( $\text{MgSO}_4$ ) and all volatiles

have been removed under reduced pressure. Column chromatography ( $\text{SiO}_2$ ;  $n$ -hexane/EtOAc, 5:1  $\rightarrow$  3:1) yielded pure **27** (21.8 mg, 56.8  $\mu\text{mol}$ , 78%) as a colorless solid; mp 86–89 °C; TLC ( $n$ -hexane/EtOAc, 3:1  $v/v$ ):  $R_F = 0.17$ ;  $[\alpha]_D^{24}$  ( $\text{deg cm}^3 \text{g}^{-1} \text{dm}^{-1}$ ) =  $-54$  ( $c = 0.0102 \text{ g cm}^{-3}$  in  $\text{CHCl}_3$ ); IR ( $\text{CCl}_4$ ):  $\nu_{\text{max}}$  3408, 2927, 2105, 1637, 1463, 1383, 1053, 788  $\text{cm}^{-1}$ ;  $^1\text{H}$  NMR (300 MHz,  $\text{CDCl}_3$ )  $\delta$  5.35 (m, 1 H, H-6), 5.20 (s, 1 H, H-18), 4.93 (s, 1 H, H-18), 4.19 (m, 1 H, H-22), 4.15 (m, 1 H, H-23), 3.74 (m, 1 H, H-23), 3.52 (m, 1 H, H-3), 2.68 (m, 1 H, H-12), 2.37 (m, 1 H, H-4), 2.36 (m, 1 H, H-20), 2.21 (m, 1 H, H-4), 2.13 (m, 1 H, H-7), 1.83 (m, 1 H, H-2), 1.79 (m, 1 H, H-11), 1.74 (m, 1 H, H-1), 1.69 (m, 2 H, H-16), 1.68 (m, 1 H, H-11), 1.67 (m, 1 H, H-15), 1.63 (m, 1 H, H-14), 1.62 (m, 1 H, H-7), 1.54 (m, 1 H, H-2), 1.36 (m, 1 H, H-15), 1.35 (m, 1 H, H-8), 1.33 (m, 1 H, H-8), 1.16 (dt,  $J = 13.6, 3.6$  Hz, 1 H, H-1), 1.10 (d,  $J = 7.2$  Hz, 3 H, H-21), 0.99 (s, 3 H, H-19);  $^{13}\text{C}$  NMR (75 MHz,  $\text{CDCl}_3$ )  $\delta$  153.2 (C-13), 141.9 (C-5), 122.3 (C-6), 108.3 (C-18), 88.0 (C-17), 72.0 (C-3), 69.1 (C-23), 64.7 (C-22), 53.8 (C-9), 46.5 (C-14), 44.6 (C-20), 42.0 (C-12), 41.9 (C-4), 39.9 (C-8), 38.4 (C-1), 37.1 (C-10), 31.6 (C-2), 31.4 (C-7), 30.6 (C-16), 27.8 (C-11), 24.2 (C-15), 19.1 (C-19), 10.0 (C-21); ESI-HRMS ( $m/z$ ):  $[\text{M}+\text{Na}]^+$  calcd for  $\text{C}_{23}\text{H}_{34}\text{N}_3\text{O}_2\text{Na}$ : 406.24650, found 406.24614;  $[2\text{M}+\text{Na}]^+$  calcd for  $\text{C}_{46}\text{H}_{68}\text{N}_3\text{O}_4\text{Na}$ : 789.50378, found: 789.50336.

### 3.8 (–)-*exo*-C-nor-D-homo-aminofuran **8**

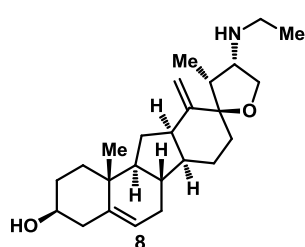

To a solution of azidofuran **7** (34.5 mg, 75.1  $\mu\text{mol}$ ) in EtOH was added freshly prepared Raney-nickel (W2) and stirred for 4 h. The reaction mixture was filtered through Celite and washed with EtOH (4 x 5 mL). The crude was dissolved in  $\text{CH}_2\text{Cl}_2$  and filtered (paper) and washed with  $\text{CH}_2\text{Cl}_2$  (4 x 5 mL). All volatiles were removed under reduced pressure. Column chromatography ( $\text{SiO}_2$ ;  $\text{CHCl}_3/\text{EtOH}/\text{NH}_3$  (25% aq.), 95:5:0.5  $v/v/v$ ) yielded pure **8** (10.7 mg, 27.8  $\mu\text{mol}$ , 37%) as colorless crystals; m.p.: 125–130 °C; TLC ( $\text{CHCl}_3/\text{EtOH}/\text{NH}_3$  (25% aq.), 95:5:0.5  $v/v/v$ ):  $R_F = 0.15$ ;

$[\alpha]_D^{24}$  ( $\text{deg cm}^3 \text{g}^{-1} \text{dm}^{-1}$ ) =  $-10$  ( $c = 0.0047 \text{ g cm}^{-3}$  in  $\text{CH}_2\text{Cl}_2$ ); IR (KBr):  $\nu_{\text{max}}$  3408, 1730, 1384, 1095, 712  $\text{cm}^{-1}$ ;  $^1\text{H}$  NMR (300 MHz,  $\text{CDCl}_3$ )  $\delta$  5.35 (m, 1 H, H-6), 5.17 (s, 1 H, H-18), 4.89 (s, 1 H, H-18), 4.11 (t,  $J = 6.9$  Hz, 1 H, H-23), 3.52 (m, 2 H, H-22, H-3), 3.45 (m, 1 H, H-23), 2.71 (m, 1 H, H-12), 2.66 (m, 1 H, H-24), 2.55 (m, 1 H, H-24), 2.36 (m, 1 H, H-4), 2.25 (m, 1 H, H-20), 2.21 (m, 1 H, H-4), 2.08 (m, 1 H, H-7), 1.80 (m, 1 H,

H-2), 1.78 (m, 1 H, H-10), 1.77 (m, 1 H, H-16), 1.74 (m, 1 H, H-16), 1.73 (m, 1 H, H-1), 1.67 (m, 1 H, H-15), 1.59 (m, 1 H, H-14), 1.55 (m, 1 H, H-11), 1.53 (m, 1 H, H-15), 1.51 (m, 1 H, H-2), 1.38 (m, 1 H, H-8), 1.31 (m, 1 H, H-9), 1.14 (m, 1 H, H-1), 1.10 (t,  $J = 7.2$  Hz, 3 H, H-25), 0.99 (s, 3 H, H-19), 0.93 (d,  $J = 6.9$  Hz, 3 H, H-21);  $^{13}\text{C}$  NMR (75 MHz,  $\text{CDCl}_3$ ) 153.2 (C-13), 142.1 (C-5), 122.2 (C-6), 107.5 (C-18), 89.4 (C-17), 72.0 (C-3), 69.8 (C-23), 59.7 (C-22), 53.8 (C-9), 46.4 (C-14), 42.9 (C-24), 42.1 (C-12), 41.9 (C-4), 38.4 (C-1), 38.0 (C-20), 37.6 (C-8), 37.3 (C-10), 31.6 (C-2), 31.4 (C-11), 31.0 (C-7), 26.0 (C-16), 23.3 (C-15), 19.2 (C-19), 15.7 (C-25), 8.0 (C-21); ESI-HRMS ( $m/z$ ):  $[\text{M}+\text{H}]^+$  calcd for  $\text{C}_{25}\text{H}_{40}\text{NO}_2$ : 386.30536, found 386.30560.

### 3.9 (-)-*exo*-C-nor-D-homo-aminoalcohol **9**

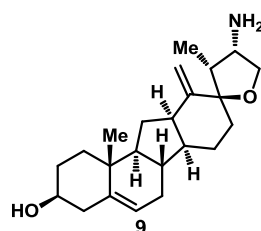

To a solution of alcohol **27** (4.4 mg, 11.6  $\mu\text{mol}$ ) in EtOH (1 mL) sodiumborohydride (2.4 mg, 63.8  $\mu\text{mol}$ ) was added in one portion. The reaction mixture was stirred for 5 d at 65 °C and was allowed to cool to room temperature. Saturated aqueous  $\text{NH}_4\text{Cl}$  solution (2 mL) was added, the aqueous phase was extracted with  $\text{CH}_2\text{Cl}_2$  (5 x 2 mL), the combined organic layers were dried ( $\text{Na}_2\text{SO}_4$ ) and all volatiles were removed under reduced pressure. Column chromatography ( $\text{SiO}_2$ ;  $\text{CHCl}_3/\text{EtOH}/\text{NH}_3$  (25% aq.), 95:5:0.5 v/v/v) yielded pure aminoalcohol **9** (2.6 mg, 7.2  $\mu\text{mol}$ , 62%) as a colorless solid; mp: 166-168 °C; TLC ( $\text{CHCl}_3/\text{EtOH}/\text{NH}_3$  (25% aq.), 90:10:0.5 v/v/v):  $R_F = 0.21$ ;  $[\alpha]_D^{24}$  ( $\text{deg cm}^3 \text{ g}^{-1} \text{ dm}^{-1}$ ) = -6 ( $c = 0.0012 \text{ g cm}^{-3}$  in  $\text{CH}_2\text{Cl}_2$ ); IR (KBr)  $\nu_{\text{max}}$ : 3445, 2927, 1634, 1384, 1050, 697  $\text{cm}^{-1}$ ;  $^1\text{H}$  NMR (300 MHz,  $\text{CD}_3\text{OD}$ )  $\delta$  5.35 (s, 1 H), 5.18 (s, 1 H), 4.98 (s, 1 H), 4.15 (q,  $J = 9$  Hz, 1 H), 3.85 (m, 1 H), 3.72 (m, 1 H), 3.37 (m, 2 H), 3.24 (m, 1 H), 2.79 (m, 1 H), 2.54 (m, 1 H), 2.31 (m, 1 H), 2.19 (m, 1 H), 2.11 (m, 1 H), 1.86 (m, 1 H), 1.81 (m, 1 H), 1.78 (m, 1 H), 1.75 (m, 1 H), 1.71 (m, 1 H), 1.66 (m, 1 H), 1.63 (m, 1 H), 1.58 (m, 1 H), 1.55 (m, 1 H), 1.50 (m, 1 H), 1.46 (m, 1 H), 1.40 (m, 1 H), 1.38 (m, 1 H), 1.36 (m, 1 H), 1.21 (m, 1 H), 1.18 (m, 1 H), 1.13 (m, 1 H), 1.08 (d,  $J = 7.2$  Hz, 3 H), 1.00 (s, 3 H); ESI-HRMS ( $m/z$ ):  $[\text{M}+\text{H}]^+$  calcd for  $\text{C}_{23}\text{H}_{36}\text{NO}_2$ : 358.27406, found 358.27391.

### 3.10 (-)-Alkene **11** and *epi*-**11**

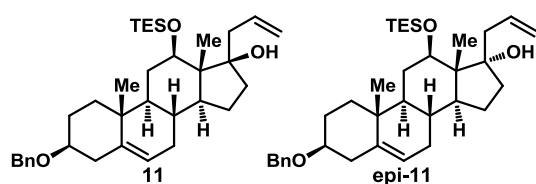

Ceriumchloride heptahydrate (35.2 g, 94.5 mmol) was heated under vacuum (0.5 mbar) at 150 °C for 3 h then at 0.05 mbar and 300 °C overnight. After cooling to room temperature THF (144 mL) was added and the suspension was stirred for 2 h at room temperature and then cooled to 0 °C. A solution of allylmagnesium bromide (1 M in THF; 94.5 mL, 94.5 mmol) was added dropwise and the reaction mixture was stirred at this temperature for 1.5 h. Then, 3-benzyl-12 $\beta$ -(triethylsilyloxy)-dehydroandrosterone [**1**] (4.79 g, 9.41 mmol) in THF (17 mL) was added at once and stirring was continued for another 30 min. The reaction was quenched with saturated aqueous  $\text{NH}_4\text{Cl}$  (200 mL), extracted with EtOAc (2 x 70 mL) and the combined organic extracts were washed with brine (130 mL) and dried ( $\text{MgSO}_4$ ). The solvents were removed under reduced pressure and the crude product was purified by column chromatography ( $\text{SiO}_2$ ; *n*-hexane/EtOAc, 22:1 v/v) to yield a mixture of the epimeric alcohols **11** and *epi*-**11** in a ratio of 15:1 (4.84 g, 8.78 mmol, 93%) as a colorless oil and recovered **10** (335 mg, 0.66 mmol); TLC (*n*-hexane/EtOAc, 10:1 v/v): 0.38;  $[\alpha]_D^{22}$  ( $\text{deg cm}^3 \text{ g}^{-1} \text{ dm}^{-1}$ ) = -50 ( $c = 0.0100 \text{ g cm}^{-3}$  in  $\text{CHCl}_3$ ); IR ( $\text{CCl}_4$ ):  $\nu_{\text{max}}$  3574, 732, 697  $\text{cm}^{-1}$ ; NMR data of the main isomer:  $^1\text{H}$  NMR (400 MHz,  $\text{CDCl}_3$ )  $\delta$  7.30 (m, 5 H), 6.05 (dddd,  $J = 17.1, 10.1, 8.4, 5.5$  Hz, 1

H), 5.36 (m, 1 H), 5.15 (d,  $J = 9.6$  Hz, 1 H), 5.10 (d,  $J = 17.2$  Hz, 1 H), 4.57 (d,  $J = 2.6$  Hz, 2 H), 3.85 (dd,  $J = 11.0, 4.7$  Hz, 1 H), 3.28 (tt,  $J = 11.2, 4.5$  Hz, 1 H), 2.46 (m, 2 H), 2.26 (m, 2 H), 1.05 (s, 3 H), 0.99 (t,  $J = 7.9$  Hz, 9 H), 0.95 (s, 3 H), 0.62 (m, 6 H);  $^{13}\text{C}$  NMR (100 MHz,  $\text{CDCl}_3$ )  $\delta$  140.8, 139.1, 135.6, 128.5, 127.6, 127.5, 121.5, 117.5, 83.2, 78.5, 74.9, 70.1, 50.7, 49.8, 49.6, 41.9, 39.1, 37.5, 37.1, 32.4, 32.0, 31.5, 30.4, 28.6, 23.7, 19.5, 9.6, 7.2, 5.9; ESI-HRMS ( $m/z$ ):  $[\text{M}+\text{Na}]^+$  calcd for  $\text{C}_{35}\text{H}_{54}\text{O}_3\text{SiNa}$ : 537.37344, found: 537.37288,  $[\text{2M}+\text{Na}]^+$  calcd for  $\text{C}_{70}\text{H}_{108}\text{O}_6\text{Si}_2\text{Na}$ : 1123.75767, found: 1123.75776.

### 3.11 (–)-Diol **28** and **epi-28**

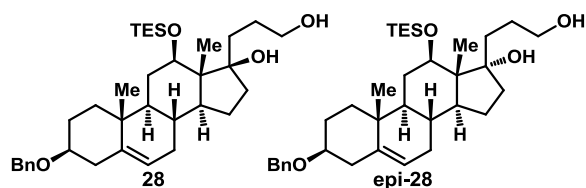

To a stirred solution of **11** and **epi-11** (5.07 g, 9.20 mmol) in THF (40 mL) was added a solution of 9-borabicyclo[3.3.1]nonane (0.5 M in THF; 73.6 mL, 36.8 mmol) dropwise at room temperature. After stirring for 6 h at 70 °C the reaction mixture was cooled to 0 °C and  $\text{H}_2\text{O}$  (45 mL) was added carefully. Then sodium perborate (21.23 g, 138.0 mmol) was added sequentially and stirring was continued at 50 °C for 12 h. The reaction was diluted with  $\text{H}_2\text{O}$  (43 mL), extracted with EtOAc (3 x 90 mL) and the combined organic extracts were washed with brine (60 mL) and dried ( $\text{MgSO}_4$ ). All volatiles were removed under reduced pressure and the crude product was purified by column chromatography ( $\text{SiO}_2$ ;  $n$ -hexane/EtOAc, 4:1 v/v) to yield a mixture of the epimeric alcohols **28** and **epi-28** in a ratio of 15:1 as a colorless oil (4.78 g, 8.41 mmol, 91%); TLC ( $n$ -hexane/EtOAc, 3:2 v/v):  $R_F = 0.42$ ;  $[\alpha]_D^{22}$  (deg  $\text{cm}^3 \text{g}^{-1} \text{dm}^{-1}$ ) =  $-56$  ( $c = 0.0101 \text{ g cm}^{-3}$  in  $\text{CHCl}_3$ ); IR ( $\text{CCl}_4$ ):  $\nu_{\text{max}}$  3573, 3424, 744, 697  $\text{cm}^{-1}$ ; NMR data of the main isomer:  $^1\text{H}$  NMR (300 MHz,  $\text{CDCl}_3$ )  $\delta$  7.30 (m, 5 H), 5.34 (m, 1 H), 4.56 (d,  $J = 1.5$  Hz, 2 H), 3.87 (dd,  $J = 10.9, 4.8$  Hz, 1 H), 3.67 (t,  $J = 5.8$  Hz, 2 H), 3.27 (m, 1 H), 2.44 (m, 1 H), 2.25 (m, 1 H), 1.04 (s, 3 H), 0.97 (m, 9 H), 0.93 (s, 3 H), 0.61 (m, 6 H);  $^{13}\text{C}$  NMR (75 MHz,  $\text{CDCl}_3$ )  $\delta$  140.8, 139.1, 128.5, 127.7, 127.6, 121.5, 83.6, 78.5, 74.8, 70.1, 63.9, 50.9, 49.6, 49.6, 39.1, 37.5, 37.2, 33.6, 32.1, 32.1, 31.6, 30.3, 28.6, 27.4, 23.8, 19.5, 9.6, 7.2, 5.9; ESI-HRMS ( $m/z$ ):  $[\text{M}+\text{Na}]^+$  calcd for  $\text{C}_{35}\text{H}_{56}\text{O}_4\text{SiNa}$ : 591.38401, found: 591.38366.

### 3.12 (–)-Spirolactone **12** and (–)-20-epi-spirolactone **epi-12**

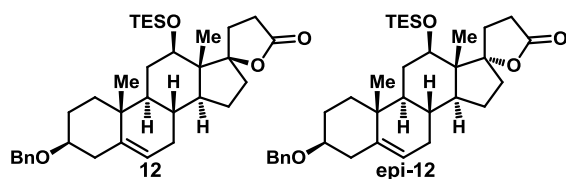

To a solution of the alcohols **28** and **epi-28** (4.60 g, 8.07 mmol) in  $\text{CH}_2\text{Cl}_2$  (60 mL) was added with iodobenzene diacetate (12.8 g, 39.7 mmol) and 2,2,6,6-tetramethylpiperidine-1-oxyl (252 mg, 1.61 mmol) at room temperature and the mixture was stirred for 3 h. The reaction mixture was diluted with  $\text{CH}_2\text{Cl}_2$  (30 mL) and treated with saturated aqueous  $\text{Na}_2\text{S}_2\text{O}_3$  solution (30 mL). The phases were separated and the organic phase was washed with saturated aqueous  $\text{NaHCO}_3$  solution (20 mL), brine (20 mL), and then dried ( $\text{MgSO}_4$ ). All volatiles were removed under reduced pressure and the crude product was purified by column chromatography ( $\text{SiO}_2$ ;  $n$ -hexane/EtOAc, 9:1 v/v) to yield pure **12** (3.36 g, 5.94 mmol, 73%) and **epi-12** (250 mg, 0.442 mmol, 5%) both as a colorless foam; **12**: TLC ( $n$ -hexane/EtOAc, 4:1 v/v):  $R_F = 0.18$ ;  $[\alpha]_D^{22}$  (deg  $\text{cm}^3 \text{g}^{-1} \text{dm}^{-1}$ ) =  $-52$  ( $c = 0.0102 \text{ g cm}^{-3}$  in  $\text{CHCl}_3$ ); IR ( $\text{CCl}_4$ ):  $\nu_{\text{max}}$  1773, 735, 697  $\text{cm}^{-1}$ ;  $^1\text{H}$  NMR (300 MHz,  $\text{CDCl}_3$ )  $\delta$  7.34 (m, 4 H, ortho-, meta-H Bn), 7.27 (m, 1 H, para-H Bn), 5.35 (m, 1 H, H-6), 4.56 (s, 2 H, benzyl. H), 3.84 (dd,  $J = 10.9, 4.7$  Hz, 1 H, H-12), 3.28 (tt,  $J = 11.2, 4.5$  Hz, 1 H, H-3), 2.58 (m, 1 H, H-20), 2.49 (m, 1 H, H-20), 2.45 (m, 2 H, H-4, H-21), 2.28 (m, 1 H, H-4), 2.23 (m, 1 H, H-16),

2.03 (m, 1 H, H-7), 1.99 (m, 1 H, H-2), 1.87 (m, 1 H, H-21), 1.81 (m, 1 H, H-1), 1.80 (m, 1 H, H-16), 1.75 (m, 1 H, H-11), 1.66 (m, 1 H, H-15), 1.55 (m, 2 H, H-2, H-11), 1.49 (m, 1 H, H-8), 1.47 (m, 1 H, H-7), 1.45 (m, 1 H, H-15), 1.05 (m, 1 H, H-1), 1.04 (s, 3 H, H-19), 1.02 (m, 1 H, H-9), 1.01 (m, 1 H, H-14), 1.00 (s, 3 H, H-18), 0.97 (t,  $J = 7.9$  Hz, 9 H, CH<sub>3</sub> TES), 0.58 (q,  $J = 7.9$  Hz, 6H, CH<sub>2</sub> TES); <sup>13</sup>C NMR (75 MHz, CDCl<sub>3</sub>)  $\delta$  176.3 (C-22), 140.5 (C-5), 138.7 (ipso-C Bn), 128.1 (meta-C Bn), 127.3 (ortho-C Bn), 127.2 (para-C Bn), 120.8 (C-6), 95.5 (C-17), 78.1 (C-3), 74.2 (C-12), 69.7 (benzyl. C), 49.6 (C-14), 49.1 (C-13), 48.9 (C-9), 38.8 (C-4), 37.1 (C-1), 36.6 (C-10), 36.2 (C-16), 31.2 (C-8), 30.9 (C-7), 30.6 (C-11), 30.3 (C-21), 29.2 (C-20), 28.1 (C-2), 22.3 (C-15), 19.2 (C-19), 9.3 (C-18), 6.8 (CH<sub>3</sub> TES), 5.7 (CH<sub>2</sub> TES); ESI-HRMS ( $m/z$ ): [M+Na]<sup>+</sup> calcd for C<sub>35</sub>H<sub>52</sub>O<sub>4</sub>SiNa: 587.35271, found: 587.35270, [2M+Na]<sup>+</sup> calcd for C<sub>70</sub>H<sub>104</sub>O<sub>8</sub>Si<sub>2</sub>Na: 1151.71619, found: 1151.71706; **epi-12**: TLC (*n*-hexane/EtOAc, 4:1  $v/v$ ):  $R_F = 0.29$ ;  $[\alpha]_D^{22}$  (deg cm<sup>3</sup> g<sup>-1</sup> dm<sup>-1</sup>) = -68 ( $c = 0.0100$  g cm<sup>-3</sup> in CHCl<sub>3</sub>); IR (CCl<sub>4</sub>):  $\nu_{\max}$  1773, 735, 697 cm<sup>-1</sup>; <sup>1</sup>H NMR (400 MHz, CDCl<sub>3</sub>)  $\delta$  7.30 (m, 5 H), 5.35 (m, 1 H), 4.56 (s, 2 H), 4.05 (dd,  $J = 11.1, 4.8$  Hz, 1 H), 3.29 (tt,  $J = 11.1, 4.5$  Hz, 1 H), 2.77 (m, 1 H), 2.54 (m, 2 H), 2.45 (ddd,  $J = 13.2, 4.6, 2.2$  Hz, 1 H), 2.27 (m, 1 H), 1.03 (s, 3 H), 0.95 (t,  $J = 7.9$  Hz, 9 H), 0.81 (s, 3 H), 0.55 (m, 6 H); <sup>13</sup>C NMR (100 MHz, CDCl<sub>3</sub>)  $\delta$  177.2, 140.8, 139.1, 128.5, 127.7, 127.5, 121.5, 97.8, 78.5, 72.8, 70.1, 50.5, 50.3, 49.2, 39.2, 37.9, 37.4, 36.9, 31.5, 30.9, 29.6, 29.0, 28.5, 23.9, 19.5, 9.2, 7.1, 5.7; ESI-HRMS ( $m/z$ ): [M+Na]<sup>+</sup> calcd for C<sub>35</sub>H<sub>52</sub>O<sub>4</sub>SiNa: 587.35271, found: 587.35208, [2M+Na]<sup>+</sup> calcd for C<sub>70</sub>H<sub>104</sub>O<sub>8</sub>Si<sub>2</sub>Na: 1151.71619, found: 1151.71518.

### 3.13 (-)-Hydroxylactone **29**

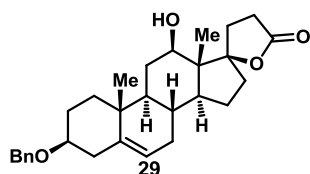

To a solution of the lactone **12** (2.80 g, 4.96 mmol) in MeCN (100 mL) was added a solution of hydrofluoric acid (50 wt % in H<sub>2</sub>O; 15 mL) in MeCN (100 mL) under stirring at room temperature. After stirring for 20 min the reaction was diluted with EtOAc (100 mL) and saturated aqueous NaHCO<sub>3</sub> solution (200 mL) was introduced carefully under vigorous stirring. The phases were separated, the aqueous phase was extracted with EtOAc (4 x 150 mL) and the combined organic extracts were washed with brine (150 mL) and dried (MgSO<sub>4</sub>). All volatiles were removed under reduced pressure and the crude product was purified by column chromatography (SiO<sub>2</sub>; *n*-hexane/EtOAc, 2:1  $v/v$ ) to yield pure **29** (1.95 g, 4.34 mmol, 87%) as a colorless solid; m.p. 215-219°C; TLC (*n*-hexane/EtOAc, 2:1  $v/v$ ):  $R_F = 0.50$ ;  $[\alpha]_D^{22}$  (deg cm<sup>3</sup> g<sup>-1</sup> dm<sup>-1</sup>) = -54 ( $c = 0.0101$  g cm<sup>-3</sup> in CHCl<sub>3</sub>); IR (KBr):  $\nu_{\max}$  3489, 1759, 735, 698 cm<sup>-1</sup>; <sup>1</sup>H NMR (400 MHz, CDCl<sub>3</sub>)  $\delta$  7.31 (m, 5 H), 5.34 (m, 1 H), 4.56 (s, 2 H), 3.69 (td,  $J = 10.7, 5.2$  Hz, 1 H), 3.27 (tt,  $J = 11.2, 4.4$  Hz, 1 H), 2.77 (m, 1 H), 2.52 (m, 2 H), 2.44 (ddd,  $J = 6.7, 5.0, 2.6$  Hz, 1 H), 2.28 (m, 2 H), 1.04 (s, 3 H), 0.97 (s, 3 H); <sup>13</sup>C NMR (100 MHz, CDCl<sub>3</sub>)  $\delta$  177.3, 141.0, 139.1, 128.5, 127.6, 127.5, 121.0, 95.9, 78.4, 73.2, 70.1, 49.5, 49.5, 49.3, 39.1, 37.3, 37.1, 36.5, 31.5, 31.4, 31.2, 31.0, 29.7, 28.4, 22.6, 19.5, 9.0; ESI-HRMS ( $m/z$ ): [M+Na]<sup>+</sup> calcd for C<sub>29</sub>H<sub>38</sub>O<sub>4</sub>Na: 473.26623, found: 473.26637, [2M+Na]<sup>+</sup> calcd for C<sub>58</sub>H<sub>76</sub>O<sub>8</sub>Na: 923.54324, found: 923.54277.

### 3.14 (-)-*exo*-C-nor-D-homo-lactone **13** and (-)-*endo*-C-nor-D-homo-lactone **30**

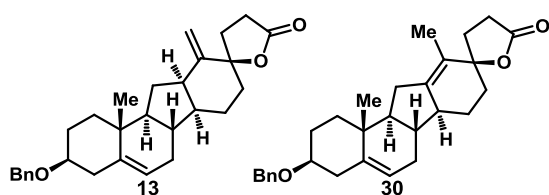

To a stirred solution of the alcohol **29** (1.95 g, 4.34 mmol) in pyridine (60 mL) was added triflic anhydride (1.44 mL, 8.68 mmol) at 0 °C. After stirring at this temperature for 10 min the reaction was warmed to 50 °C and kept there for 90 min. The reaction was cooled again to 0 °C,

additional triflic anhydride (1.44 mL, 8.68 mmol) was added and stirring was continued at this temperature for 10 min and thereafter at 50 °C for 2 h. After allowing the dark brown mixture to cool to room temperature, it was diluted with CH<sub>2</sub>Cl<sub>2</sub> (200 mL) and washed with hydrochloric acid (0.5 M, 3 x 50 mL) and finally with saturated aqueous NaHCO<sub>3</sub> solution (60 mL) and brine (60 mL). The organic phase was dried (MgSO<sub>4</sub>), all volatiles were removed under reduced pressure and the crude product was purified by column chromatography (SiO<sub>2</sub>; *n*-hexane/EtOAc, 8.5:1.5 v/v) to yield pure *exo*-C-*nor*-D-*homo*-lactone **13** (0.86 g, 2.0 mmol, 46%) and pure *endo*-C-*nor*-D-*homo*-lactone **30** (0.28 g, 0.65 mmol, 15%) both as colorless needles; **13**: m.p. 94-102°C; TLC (*n*-hexane/EtOAc, 2:1 v/v): *R*<sub>F</sub> = 0.46; [ $\alpha$ ]<sub>D</sub><sup>22</sup> (deg cm<sup>3</sup> g<sup>-1</sup> dm<sup>-1</sup>) = -32 (*c* = 0.0100 g cm<sup>-3</sup> in CHCl<sub>3</sub>); IR (KBr):  $\nu_{\max}$  1767, 736, 697 cm<sup>-1</sup>; <sup>1</sup>H NMR (300 MHz, CDCl<sub>3</sub>)  $\delta$  7.30 (m, 5 H), 5.35 (m, 1 H), 5.18 (d, *J* = 2.1 Hz, 1 H), 4.93 (d, *J* = 1.8 Hz, 1 H), 4.56 (s, 2 H), 3.28 (tt, *J* = 11.4, 4.4 Hz, 1 H), 2.74 (m, 1 H), 2.50 (m, 3 H), 2.27 (m, 2 H), 2.09 (m, 4 H), 1.00 (s, 3 H); <sup>13</sup>C NMR (75 MHz, CDCl<sub>3</sub>)  $\delta$  177.0, 149.3, 142.2, 139.1, 128.5, 127.6, 127.5, 121.8, 108.2, 88.3, 78.7, 70.0, 53.7, 45.8, 41.2, 38.7, 38.6, 38.3, 37.5, 35.8, 33.1, 31.1, 28.3, 28.3, 26.8, 23.1, 19.0; ESI-HRMS (*m/z*): [*M*+Na]<sup>+</sup> calcd for C<sub>29</sub>H<sub>36</sub>O<sub>3</sub>Na: 455.25567, found: 455.25541, [*2M*+Na]<sup>+</sup> calcd for C<sub>58</sub>H<sub>72</sub>O<sub>6</sub>Na: 887.52211, found: 887.52285; **30**: m.p. 181-185°C; TLC (*n*-hexane/EtOAc, 2:1 v/v): *R*<sub>F</sub> = 0.46; [ $\alpha$ ]<sub>D</sub><sup>22</sup> (deg cm<sup>3</sup> g<sup>-1</sup> dm<sup>-1</sup>) = -110 (*c* = 0.0098 g cm<sup>-3</sup> in CHCl<sub>3</sub>); IR (KBr):  $\nu_{\max}$  1759, 737, 696 cm<sup>-1</sup>; <sup>1</sup>H NMR (300 MHz, CDCl<sub>3</sub>)  $\delta$  7.30 (m, 5H), 5.36 (m, 1H), 4.57 (s, 2H), 3.29 (tt, *J* = 11.1, 4.3 Hz, 1H), 2.67 (m, 2H), 2.51 (ddd, *J* = 13.3, 4.5, 2.0 Hz, 1H), 2.39 (td, *J* = 13.2, 9.2 Hz, 1H), 2.20 (m, 5H), 1.60 (s, 3H), 0.98 (s, 3H); <sup>13</sup>C NMR (75 MHz, CDCl<sub>3</sub>)  $\delta$  177.0, 146.3, 141.9, 139.1, 128.5, 127.7, 127.5, 123.5, 121.7, 86.9, 78.6, 70.1, 52.2, 49.2, 41.9, 38.8, 38.5, 38.3, 37.0, 31.8, 31.1, 30.0, 28.9, 28.2, 24.1, 18.7, 13.2; ESI-HRMS (*m/z*): [*M*+Na]<sup>+</sup> calcd for C<sub>29</sub>H<sub>36</sub>O<sub>3</sub>Na: 455.25567, found: 455.25609, [*2M*+Na]<sup>+</sup> calcd for C<sub>58</sub>H<sub>72</sub>O<sub>6</sub>Na: 887.52211, found: 887.52275.

### 3.15 (-)-*exo*-C-*nor*-D-*homo*-azidolactone **14** and (+)-21-*epi*-*exo*-C-*nor*-D-*homo*-azidolactone **epi-14**

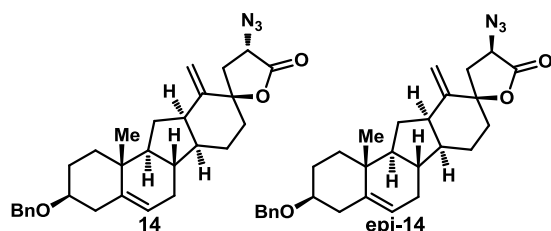

To a stirred solution of diisopropylamine (938  $\mu$ L, 6.65 mmol) in THF (6.6 mL) was added *n*-butyllithium (1.6 M solution in hexanes; 4.04 mL, 6.46 mmol) at -78 °C. After stirring for 40 min at this temperature a solution of the lactone **13** (1.60 g, 3.69 mmol) in THF (9 mL) was added dropwise and the temperature was

raised to -30 °C over the course of 1 h, kept at this temperature for 10 min and then lowered again to -78 °C. Freshly prepared trisylazide (2.5 g, 8.08 mmol) in THF (13.2 mL) was added in one portion and stirring was continued for 1.5 h. The reaction mixture was quenched with glacial acetic acid (0.66 mL), warmed to room temperature and stirred there for another 30 min. After dilution with EtOAc (75 mL) and saturated aqueous NH<sub>4</sub>Cl solution (40 mL), the phases were separated and the aqueous layer was extracted with EtOAc (2 x 75 mL). The combined organic extracts were washed with brine (40 mL), dried (MgSO<sub>4</sub>) and all volatiles were removed under reduced pressure. Purification by column chromatography (SiO<sub>2</sub>; *n*-hexane/EtOAc, 12:1 v/v) yielded pure **14** (754 mg, 1.59 mmol, 43%) as colorless needles and the epimeric azide **epi-14** (178 mg, 376  $\mu$ mol, 10%) as a colorless solid; **14**: m.p. 144-146°C; TLC (*n*-hexane/EtOAc, 5:1 v/v): *R*<sub>F</sub> = 0.46; [ $\alpha$ ]<sub>D</sub><sup>22</sup> (deg cm<sup>3</sup> g<sup>-1</sup> dm<sup>-1</sup>) = -109 (*c* = 0.0100 g cm<sup>-3</sup> in CHCl<sub>3</sub>); IR (KBr):  $\nu_{\max}$  2127, 1774, 737, 695 cm<sup>-1</sup>; <sup>1</sup>H NMR (400 MHz, CDCl<sub>3</sub>)  $\delta$  7.31 (m, 5 H), 5.35 (m, 1 H), 5.14 (d, *J* = 2.4 Hz, 1 H), 4.98 (d, *J* = 2.2 Hz, 1 H), 4.57 (s, 2 H), 4.29 (dd, *J* = 10.9, 8.4 Hz, 1 H), 3.28 (tt, *J* = 11.3, 4.4 Hz, 1 H), 2.77 (m, 1 H), 2.71 (dd, *J* = 12.6, 8.4 Hz, 1



H), 2.50 (ddd,  $J = 13.3, 4.6, 2.1$  Hz, 1 H), 2.26 (m, 1 H), 2.10 (m, 2 H), 0.99 (s, 3 H);  $^{13}\text{C}$  NMR (100 MHz,  $\text{CDCl}_3$ )  $\delta$  173.1, 148.7, 142.1, 139.1, 128.5, 127.6, 127.5, 121.8, 108.8, 86.3, 78.6, 70.1, 57.2, 53.6, 45.9, 41.3, 38.8, 38.7, 38.5, 38.3, 37.5, 36.3, 31.0, 28.2, 26.7, 22.7, 19.0; ESI-HRMS ( $m/z$ ):  $[\text{M}+\text{Na}]^+$  calcd for  $\text{C}_{29}\text{H}_{35}\text{N}_3\text{O}_3\text{Na}$ : 496.25767, found: 496.25726,  $[2\text{M}+\text{Na}]^+$  calcd for  $\text{C}_{58}\text{H}_{70}\text{N}_6\text{O}_6\text{Na}$ : 969.52401, found: 969.52406; **epi-14**: m.p. 144–146 °C; TLC (*n*-hexane/EtOAc, 5:1  $v/v$ ):  $R_F = 0.36$ ;  $[\alpha]_D^{22}$  (deg  $\text{cm}^3 \text{g}^{-1} \text{dm}^{-1}$ ) = +50 ( $c = 0.0102 \text{ g cm}^{-3}$  in  $\text{CHCl}_3$ ); IR ( $\text{CCl}_4$ ):  $\nu_{\text{max}}$  2113, 1780, 736, 687  $\text{cm}^{-1}$ ;  $^1\text{H}$  NMR (300 MHz,  $\text{CDCl}_3$ )  $\delta$  7.31 (m, 5 H), 5.35 (m, 1 H), 5.31 (d,  $J = 2.3$  Hz, 1 H), 4.98 (d,  $J = 2.2$  Hz, 1 H), 4.57 (s, 2 H), 4.39 (t,  $J = 8.9$  Hz, 1 H), 3.28 (tt,  $J = 11.2, 4.4$  Hz, 1 H), 2.72 (m, 1 H), 2.62 (dd,  $J = 13.1, 8.8$  Hz, 1 H), 2.50 (ddd,  $J = 13.2, 4.6, 2.2$  Hz, 1 H), 2.27 (m, 2 H), 2.10 (m, 3 H), 1.00 (s, 3 H);  $^{13}\text{C}$  NMR (100 MHz,  $\text{CDCl}_3$ )  $\delta$  172.4, 149.1, 142.3, 139.1, 128.5, 127.7, 127.6, 121.8, 108.7, 86.4, 78.7, 70.1, 57.6, 53.7, 45.2, 41.3, 40.0, 39.2, 38.7, 38.3, 37.5, 35.4, 31.2, 28.3, 27.1, 23.6, 19.1; ESI-HRMS ( $m/z$ ):  $[\text{M}+\text{Na}]^+$  calcd for  $\text{C}_{29}\text{H}_{35}\text{N}_3\text{O}_3\text{Na}$ : 496.25732, found: 496.25726,  $[2\text{M}+\text{Na}]^+$  calcd for  $\text{C}_{58}\text{H}_{70}\text{N}_6\text{O}_6\text{Na}$ : 969.52449, found: 969.52454.

### 3.16 (–)-*exo*-C-*nor*-D-*homo*-azidolactol **31**

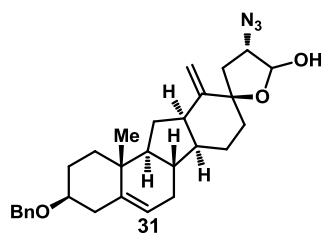

To a stirred solution of azidolactone **14** (377 mg, 0.791 mmol) in THF (6.3 mL) at  $-78$  °C was added diisobutylaluminumhydride (1.2 M in toluene; 3.32 mL, 3.98 mmol) dropwise and stirring was continued at this temperature for 1 h and then at  $-65$  °C for 1 h. The reaction mixture was quenched with MeOH (1.6 mL), diluted with  $\text{CH}_2\text{Cl}_2$  (40 mL) and Rochelle-salt solution (10 wt % in  $\text{H}_2\text{O}$ ) (40 mL) and warmed to room temperature. After stirring for 1 h the

phases were separated and the aqueous layer was extracted with  $\text{CH}_2\text{Cl}_2$  (2 x 40 mL). The combined organic extracts were dried ( $\text{MgSO}_4$ ) and the solvents removed under reduced pressure. Purification by column chromatography ( $\text{SiO}_2$ ; *n*-hexane/EtOAc, 5:1  $v/v$ ) yielded a mixture of the two epimers of **31** in a 1:1.3 (A:B) ratio (333 mg, 700  $\mu\text{mol}$ , 88%) as a colorless oil: TLC (*n*-hexane/EtOAc, 3:1  $v/v$ ):  $R_F = 0.46$ ;  $[\alpha]_D^{22}$  (deg  $\text{cm}^3 \text{g}^{-1} \text{dm}^{-1}$ ) =  $-64$  ( $c = 0.0100 \text{ g cm}^{-3}$  in  $\text{CHCl}_3$ ); IR ( $\text{CCl}_4$ ):  $\nu_{\text{max}}$  2105, 734, 697  $\text{cm}^{-1}$ ;  $^1\text{H}$  NMR: (400 MHz,  $\text{CDCl}_3$ )  $\delta$  (ppm) 7.34 (m, 4H, ortho-, meta-H Bn), 7.28 (m, 1H, para-H Bn), 5.46 (m, 1H), 5.36 (m, 1H), 5.34 (m, 1H,  $\text{H}_A$ ), 5.17 (m, 1H,  $\text{H}_B$ ), 4.87 (m, 1H), 4.57 (s, 2H, benzyl. H Bn), 3.99 (ddd,  $J = 6.5, 4.9, 2.5$  Hz, 1H,  $\text{H}_A$ ), 3.76 (m, 1H), 3.67 (ddd,  $J = 11.2, 7.1, 4.2$  Hz, 1H,  $\text{H}_B$ ), 3.56 (m, 1H), 3.29 (m, 1H), 2.72 (m, 1H), 2.50 (m, 1H), 2.28 (m, 2H), 2.11 (m, 2H), 1.00 (s, 3H,  $\text{H}_A$ -19), 0.98 (s, 3H,  $\text{H}_B$ -19);  $^{13}\text{C}$  NMR: (100 MHz,  $\text{CDCl}_3$ )  $\delta$  (ppm) 153.2, 151.9, 142.2(A), 142.1(B), 139.0, 128.5, 127.7(A), 127.5(B), 122.0(A), 121.9(B), 107.7(A), 107.4(B), 100.8, 96.2, 88.0, 86.2, 78.72(A), 78.69(B), 70.0, 68.1, 66.3, 61.0, 53.7(A), 53.6(B), 45.7(A), 45.6(B), 42.2(A), 41.6(B), 39.4, 38.7(A), 38.6(B), 38.31(A), 38.27(B), 38.1, 37.6, 37.5, 36.9, 31.2, 30.9, 28.2, 26.8(A), 26.6(B), 25.7, 24.1, 23.4, 19.08(A), 19.06(B); ESI-HRMS ( $m/z$ ):  $[\text{M}+\text{Na}]^+$  calcd for  $\text{C}_{29}\text{H}_{37}\text{N}_3\text{O}_3\text{Na}$ : 498.27271, found: 498.27272,  $[2\text{M}+\text{Na}]^+$  calcd for  $\text{C}_{58}\text{H}_{74}\text{N}_6\text{O}_6\text{Na}$ : 973.55621, found: 973.55694.

### 3.17 (–)-Furan **15**

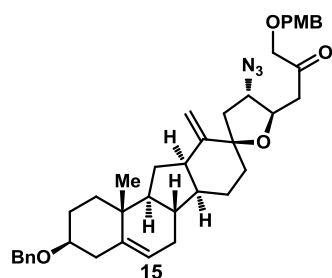

Finely ground bariumhydroxide octahydrate (3.83 g, 12.1 mmol) was activated in a constant stream of dry argon at  $140$  °C while stirring for 2 h. After cooling to room temperature, a solution of dimethyl (3-((4-methoxybenzyl)oxy)-2-oxopropyl)phosphonate [1] (8.24 g, 27.2 mmol) in THF (78 mL) was added and the suspension was warmed to  $65$  °C under vigorous stirring until a yellow

solution was formed (2 h). The reaction mixture was allowed to cool to room temperature and the lactol **31** (1.44 g, 3.03 mmol) in THF/H<sub>2</sub>O (78 mL, 40:1) was introduced in one portion. The reaction mixture was heated to reflux and THF was evaporated slowly overnight (by inserting a fine cannula through a septum, oil bath temperature 80 °C). The remaining viscous oil was dissolved in EtOAc (100 mL), washed with saturated aqueous NH<sub>4</sub>Cl (40 mL) and the phases were separated. The aqueous phase was extracted with EtOAc (50 mL) and the combined organic phases were washed with brine (50 mL), dried (MgSO<sub>4</sub>) and the solvent was removed under reduced pressure. Purification by column chromatography (SiO<sub>2</sub>; *n*-hexane/EtOAc, 7:1 *v/v*) yielded pure **15** (995 mg, 1.53 mmol, 50%) as a yellow oil; TLC (*n*-hexane/EtOAc, 5:1 *v/v*): *R*<sub>F</sub> = 0.17; [ $\alpha$ ]<sub>D</sub><sup>23</sup> (deg cm<sup>3</sup> g<sup>-1</sup> dm<sup>-1</sup>) = -6 (*c* = 0.0100 g cm<sup>-3</sup> in CHCl<sub>3</sub>); IR (CCl<sub>4</sub>):  $\nu_{\text{max}}$  = 2932, 2857, 2103, 1727, 1513, 1250, 1095, 788 cm<sup>-1</sup>; <sup>1</sup>H NMR (300 MHz, CDCl<sub>3</sub>)  $\delta$  7.35 (m, 4 H), 7.27 (m, 3 H), 6.88 (m, 2 H), 5.35 (m, 1 H), 5.25 (s, 1 H), 4.84 (s, 1 H), 4.57 (s, 2 H), 4.53 (s, 2 H), 4.18 (m, 1 H), 4.10 (s, 2 H), 3.80 (s, 3 H), 3.70 (m, 1 H), 3.28 (tt, *J* = 11.2, 4.4 Hz, 1 H), 2.85 (m, 1 H), 2.70 (m, 2 H), 2.49 (ddd, *J* = 13.4, 4.9, 2.4 Hz, 1 H), 2.28 (m, 2 H), 2.12 (m, 1 H), 0.98 (s, 3 H); <sup>13</sup>C NMR (100 MHz, CDCl<sub>3</sub>)  $\delta$  206.4, 159.6 (para-C PMB), 152.9, 142.1, 139.1 (ipso-C Bn), 129.8 (ortho-C PMB), 129.3 (ipso-C PMB), 128.5 (meta-C Bn), 127.7 (ortho-C Bn), 127.5 (para-C Bn), 122.0, 114.0 (meta-C PMB), 107.4, 85.6, 78.8, 75.3, 73.2, 70.1, 64.2, 55.4, 53.7, 46.1, 43.0, 42.0, 41.9, 38.7, 38.4, 38.3, 37.5, 36.7, 31.1, 28.3, 26.8, 23.7, 19.1; ESI-HRMS (*m/z*): [M+H]<sup>+</sup> calcd for C<sub>40</sub>H<sub>50</sub>N<sub>3</sub>O<sub>5</sub>: 652.37505, found: 652.37476, [M+Na]<sup>+</sup> calcd for C<sub>40</sub>H<sub>49</sub>N<sub>3</sub>O<sub>5</sub>Na: 674.35644, found: 674.35639, [2M+Na]<sup>+</sup> calcd for C<sub>80</sub>H<sub>98</sub>N<sub>6</sub>O<sub>10</sub>Na: 1325.72366, found: 1325.72395.

### 3.18 (-)-Alkene **16**

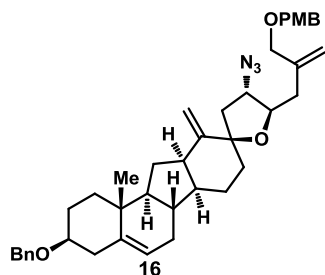

Ceriumchloride heptahydrate (2.28 g, 6.00 mmol) was heated under vacuum (0.5 mbar) at 150 °C for 1 h, and then at 0.05 mbar and 300 °C for 12 h. After cooling to room temperature THF (30 mL) was added and the suspension was stirred for 2 h. The thick suspension was cooled to -78 °C and (trimethylsilyl)methyl lithium (1 M in *n*-pentane; 6.00 mL, 6.00 mmol) was added dropwise. The resulting brown suspension was stirred for another 30 min.

To this suspension azide **15** (50.0 mg, 76.7  $\mu$ mol) in THF (1.00 mL) was added dropwise, and after stirring for 50 min TMEDA (0.91 mL, 6.00 mmol) was added. After another 15 min saturated aqueous NaHCO<sub>3</sub> (50 mL) was introduced and the mixture was allowed to warm to room temperature and diluted with EtOAc (50 mL). The phases were separated and the aqueous layer was extracted with EtOAc (50 mL). The combined organic extracts were washed with brine (30 mL), dried (MgSO<sub>4</sub>) and the solvents were removed under reduced pressure. Purification by column chromatography (SiO<sub>2</sub>; *n*-hexane/EtOAc, 7:1 *v/v*) yielded a mixture of epimeric alcohols (50.0 mg, 67.6  $\mu$ mol) as colourless oil. These alcohols were dissolved in MeCN (2.0 mL) and under stirring a solution of hydrofluoric acid (50% in water, 1 drop) in MeCN (1.0 mL) was added in one portion. After stirring for 7 min, the reaction was quenched with saturated aqueous NaHCO<sub>3</sub> solution (10 mL) and diluted with EtOAc (20 mL). The phases were separated and the aqueous layer was extracted with EtOAc (20 mL). The combined organic extracts were washed with brine (10 mL), dried (MgSO<sub>4</sub>) and the solvents were removed under reduced pressure. Purification by column chromatography (SiO<sub>2</sub>; *n*-hexane/EtOAc, 10:1 *v/v*) yielded alkene **16** (32.0 mg, 49.2  $\mu$ mol, 64%) as a yellow oil; TLC (*n*-hexane/EtOAc, 5:1 *v/v*): *R*<sub>F</sub> = 0.41; [ $\alpha$ ]<sub>D</sub><sup>23</sup> (deg cm<sup>3</sup> g<sup>-1</sup> dm<sup>-1</sup>) = -7 (*c* = 0.0100 g cm<sup>-3</sup> in CHCl<sub>3</sub>); IR (CCl<sub>4</sub>):  $\nu_{\text{max}}$  = 2930, 2854, 2101, 1613, 1513 cm<sup>-1</sup>; <sup>1</sup>H NMR (400 MHz, CDCl<sub>3</sub>)  $\delta$  7.34 (m, 4 H, ortho-H Bn, meta-H Bn), 7.26 (m, 3 H,

ortho-H PMB, para-H Bn), 6.87 (m, 2 H, meta-H PMB), 5.33 (m, 2 H), 5.18 (s, 1 H), 5.09 (s, 1 H), 4.84 (s, 1 H), 4.57 (s, 2 H, benzyl. H Bn), 4.44 (s, 2 H, benzyl. H PMB), 4.01 (s, 2 H), 3.95 (m, 1 H), 3.80 (s, 3 H), 3.64 (m, 1 H), 3.28 (m, 1 H), 2.70 (m, 1 H), 2.49 (m, 1 H), 2.44 (m, 2 H), 2.30 (m, 1 H), 2.24 (m, 1 H), 2.11 (m, 1 H), 0.99 (s, 3H);  $^{13}\text{C}$  NMR (100 MHz,  $\text{CDCl}_3$ )  $\delta$  159.3 (para-C PMB), 153.2, 142.6, 142.2, 139.2 (ipso-C Bn), 130.5 (ipso-C PMB), 129.5 (ortho-C PMB), 128.5 (meta-C Bn), 127.7 (ortho-C Bn), 127.5 (para-C Bn), 122.0, 114.6, 113.9 (meta-C PMB), 107.3, 85.2, 80.1, 78.8, 73.0, 71.8 (benzyl. C PMB), 70.1 (benzyl. C Bn), 64.8, 55.4, 53.8, 46.1, 42.2, 42.0, 38.7, 38.5, 38.4, 37.9, 37.6, 36.8, 31.2, 28.3, 26.9, 23.8, 19.1; ESI-HRMS ( $m/z$ ):  $[\text{M}+\text{Na}]^+$  calcd for  $\text{C}_{41}\text{H}_{51}\text{N}_3\text{O}_4\text{Na}$ : 672.37718, found: 672.37747.

### 3.19 (-)-Sulfonamide **17**

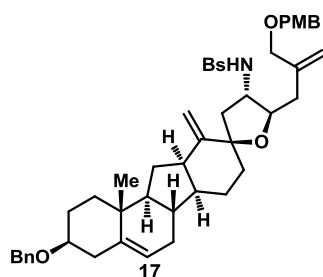

To a suspension of lithium aluminumhydride (7.50 mg, 198  $\mu\text{mol}$ ) in THF (2.0 mL) a solution of alkene **16** (40.0 mg, 61.6  $\mu\text{mol}$ ) in THF (1.0 mL) was added dropwise at 0  $^\circ\text{C}$ . The reaction mixture was stirred overnight at room temperature. The reaction was diluted with  $\text{Et}_2\text{O}$  (5 mL) and pH 7 phosphate buffer (5 mL). The phases were separated and the aqueous layer was extracted with  $\text{Et}_2\text{O}$  (2 x 10 mL). The combined organic extracts were dried ( $\text{MgSO}_4$ ) and the solvent was removed under reduced pressure. Purification by column

chromatography ( $\text{SiO}_2$ ;  $\text{CH}_2\text{Cl}_2/\text{MeOH}$ , 3:0.1 v/v) yielded the corresponding amine (37.0 mg, 59.3  $\mu\text{mol}$ , 97%) as a colorless oil; TLC ( $\text{CH}_2\text{Cl}_2/\text{MeOH}$ , 3:0.2 v/v):  $R_F$  = 0.42; ESI-HRMS ( $m/z$ ):  $[\text{M}+\text{H}]^+$  calcd for  $\text{C}_{41}\text{H}_{54}\text{NO}_4\text{S}$ : 624.40474, found: 624.40494. The amine was dissolved in DMF (6.0 mL) and cooled to 0  $^\circ\text{C}$ . Triethylamine (132  $\mu\text{L}$ , 948  $\mu\text{mol}$ ) and benzenesulfonyl chloride (90.0  $\mu\text{L}$ , 711  $\mu\text{mol}$ ) were added sequentially. The yellow solution was stirred at 0  $^\circ\text{C}$  for 25 min. The reaction mixture was quenched with saturated aqueous  $\text{NH}_4\text{Cl}$  (60 mL) and diluted with  $\text{CH}_2\text{Cl}_2$  (10 mL). The phases were separated and the aqueous layer was extracted with  $\text{CH}_2\text{Cl}_2$  (4 x 10 mL). The combined organic extracts were washed with brine (10 mL), dried ( $\text{MgSO}_4$ ) and the solvent was removed under reduced pressure. Purification by column chromatography ( $\text{SiO}_2$ ;  $n$ -hexane/ $\text{EtOAc}$ , 10:1  $\rightarrow$  2:1 v/v) yielded sulfonamide **17** (31.0 mg, 40.5  $\mu\text{mol}$ , 69%) as a yellow oil; TLC ( $n$ -hexane/ $\text{EtOAc}$ , 2:1 v/v)  $R_F$  = 0.42;  $[\alpha]_D^{25}$  ( $\text{deg cm}^3 \text{ g}^{-1} \text{ dm}^{-1}$ ) = -3 ( $c$  = 0.0100  $\text{g cm}^{-3}$  in  $\text{MeOH}$ ); IR ( $\text{CCl}_4$ ):  $\nu_{\text{max}}$  = 3387, 3279, 2931, 2858, 1723, 1650, 1585, 1513, 1448 1163, 1092, 904, 755, 593  $\text{cm}^{-1}$ ;  $^1\text{H}$  NMR (400 MHz,  $\text{CDCl}_3$ )  $\delta$  7.78 (m, 2 H), 7.55 (m, 1 H), 7.47 (m, 2 H), 7.34 (m, 4 H, ortho-H Bn, meta-H Bn), 7.27 (m, 3 H, ortho-H PMB, para-H Bn), 6.91 (m, 2 H, meta-H PMB), 5.34 (m, 2 H), 5.22 (s, 1 H), 4.83 (s, 1 H), 4.79 (s, 1 H), 4.71 (s, 1 H), 4.56 (s, 2 H, benzyl. H Bn), 4.45 (m, 2 H, benzyl. H PMB), 3.84 (m, 2 H), 3.82 (s, 3 H), 3.31-3.25 (m, 2 H), 2.63 (m, 1 H), 2.47 (m, 1 H), 2.27 (m, 4 H), 2.07 (m, 1 H), 0.96 (s, 3 H), 0.86 (m, 4 H);  $^{13}\text{C}$  NMR (75 MHz,  $\text{CDCl}_3$ )  $\delta$  159.5 (para-C PMB), 153.2, 142.2, 141.5, 140.4, 139.2 (ipso-C Bn), 132.8, 132.7, 129.9, 129.1, 128.5, 127.7, 127.5, 127.3, 122.0, 114.0, 113.9, 107.1, 85.2, 79.1, 78.8, 73.2, 72.4, 70.1, 57.4, 55.4, 53.7, 45.9, 44.6, 41.9, 38.8, 38.5, 38.4, 38.1, 37.6, 37.2, 31.2, 28.3, 26.9, 23.7, 19.1; ESI-HRMS ( $m/z$ ):  $[\text{M}+\text{Na}]^+$  calcd for  $\text{C}_{47}\text{H}_{57}\text{NO}_6\text{SNa}$ : 786.37988, found: 786.37998.

### 3.20 (+)-Allylic alcohol **32**

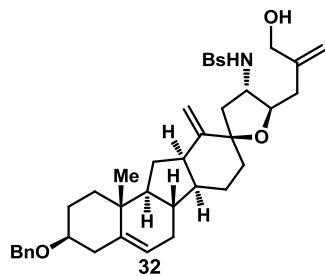

To a solution of the sulfonamide **17** (56.0 mg, 73.3  $\mu\text{mol}$ ) in  $\text{CH}_2\text{Cl}_2$  (2.6 mL) was added pH 7 phosphate buffer (0.26 mL) and 2,3-dichloro-5,6-dicyano-1,4-benzoquinone (16.0 mg, 73.3  $\mu\text{mol}$ ), after stirring at room temperature for 1 h, another portion of 2,3-dichloro-5,6-dicyano-1,4-benzoquinone (16.0 mg, 73.3  $\mu\text{mol}$ ) was added and stirring was continued for 1 h. The reaction mixture was then diluted with  $\text{CH}_2\text{Cl}_2$  (10 mL), washed with saturated aqueous  $\text{NaHCO}_3$  (10 mL) and the aqueous phase was extracted with  $\text{CH}_2\text{Cl}_2$  (2 x 10 mL). After

drying ( $\text{MgSO}_4$ ) all volatiles were removed under reduced pressure and the crude product was purified by column chromatography ( $\text{SiO}_2$ ;  $n$ -hexane/EtOAc, 1:1 v/v) to yield **32** (28.0 mg, 43.5  $\mu\text{mol}$ , 59%) as a colorless oil; TLC ( $n$ -hexane/EtOAc, 1:1 v/v)  $R_F$  = 0.44;  $[\alpha]_D^{23}$  ( $\text{deg cm}^3 \text{ g}^{-1} \text{ dm}^{-1}$ ) = +3 ( $c$  = 0.0100  $\text{g cm}^{-3}$  in  $\text{CHCl}_3$ ); IR ( $\text{CCl}_4$ ):  $\nu_{\text{max}}$  = 3445, 3276, 2928, 2358, 1652, 1447, 1330, 1162, 1093, 903, 755, 593  $\text{cm}^{-1}$ ;  $^1\text{H}$  NMR (400 MHz,  $\text{CDCl}_3$ )  $\delta$  7.88 (m, 1 H, ortho-H Bs), 7.85 (m, 1 H, ortho-H Bs), 7.61 (m, 1 H, para-H Bs), 7.53 (m, 2 H, meta-H Bs), 7.34 (m, 4 H, ortho-H Bn, meta-H Bn), 7.28 (m, 1 H, para-H Bn), 5.32 (m, 1 H), 5.22 (s, 1 H), 5.02 (m, 1 H), 4.97 (s, 1 H), 4.83 (s, 1 H), 4.78 (s, 1 H), 4.56 (s, 2 H), 4.04 (s, 2 H), 3.77 (td,  $J$  = 8.3, 4.2 Hz, 1 H), 3.41 (m, 1 H), 3.26 (tt,  $J$  = 11.2, 4.5 Hz, 1 H), 2.68 (br, 1 H), 2.56 (m, 2 H), 2.48 (ddd,  $J$  = 13.3, 4.8, 2.2 Hz, 1 H), 2.26 (m, 4 H), 2.08 (m, 1 H), 0.97 (s, 3 H);  $^{13}\text{C}$  NMR (75 MHz,  $\text{CDCl}_3$ )  $\delta$  152.8, 145.3, 142.2, 140.5, 139.2 (ipso-C Bn), 133.0, 129.3, 128.5 (meta-C Bn), 127.7 (ortho-C Bn), 127.5, 127.2, 121.9, 114.9, 107.7, 85.4, 80.6, 78.8, 70.1, 66.6, 57.3, 53.7, 46.1, 44.2, 41.7, 38.7, 38.5, 38.4, 37.9, 37.5, 37.3, 31.1, 28.3, 26.9, 23.6, 19.1; ESI-HRMS ( $m/z$ ):  $[\text{M}+\text{Na}]^+$  calcd for  $\text{C}_{39}\text{H}_{49}\text{NO}_5\text{SNa}$ : 666.32237, found: 666.32295.

### 3.21 (–)-*N*-Bs-*O*-Bn-20-demethyl-bis-*exo*-cyclopamine **18**

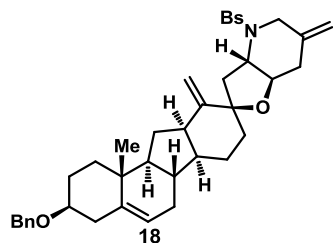

To a solution of the allylic alcohol **32** (28.0 mg, 43.5  $\mu\text{mol}$ ) in toluene (3.0 mL) was added tributylphosphine (28.0  $\mu\text{L}$ , 113  $\mu\text{mol}$ ) and 1,1'-(azodicarbonyl)-dipiperidine (28.0 mg, 104  $\mu\text{mol}$ ) at 0  $^\circ\text{C}$ . After warming to room temperature, stirring was continued for another 12 h. The reaction mixture was evaporated to dryness and the crude product was purified by column chromatography ( $\text{SiO}_2$ ;  $n$ -hexane/EtOAc, 7:1 v/v) to yield pure **18** (25.0 mg, 39.9  $\mu\text{mol}$ , 93%) as a

colorless oil; TLC ( $n$ -hexane/EtOAc, 3:1 v/v)  $R_F$  = 0.55;  $[\alpha]_D^{24}$  ( $\text{deg cm}^3 \text{ g}^{-1} \text{ dm}^{-1}$ ) = –3 ( $c$  = 0.0094  $\text{g cm}^{-3}$  in  $\text{CHCl}_3$ ); IR (KBr):  $\nu_{\text{max}}$  = 3442, 2927, 2857, 2666, 2359, 1637, 1449, 1354  $\text{cm}^{-1}$ ;  $^1\text{H}$  NMR (300 MHz,  $\text{CDCl}_3$ )  $\delta$  7.76 (m, 2 H), 7.58 (m, 3 H), 7.35 (m, 5 H), 5.35 (m, 1 H, H-6), 5.17 (s, 1 H), 5.09 (s, 1 H), 5.02 (s, 1 H), 4.86 (s, 1 H), 4.57 (s, 2 H), 4.16 (d,  $J$  = 12.3 Hz, 1 H), 3.53 (m, 1 H), 3.29 (m, 1 H, H-3), 2.78 (m, 2 H), 2.58 (m, 1 H), 2.50 (m, 1 H), 2.26 (m, 3 H), 0.90 (s, 3 H);  $^{13}\text{C}$  NMR (100 MHz,  $\text{CDCl}_3$ )  $\delta$  153.6 (C-13), 142.1 (C-5), 139.2 (ipso-C Bn), 137.6, 135.2 (ipso-C Bs), 133.3 (para-C Bs), 129.3 (meta-C Bs), 128.5 (meta-C Bn), 128.1 (ortho-C Bs), 127.7 (ortho-C Bn), 127.6 (para-C Bn), 122.1 (C-6), 116.1 (C-27), 108.3 (C-18), 85.7 (C-17), 78.8 (C-3), 78.6 (C-23), 70.1 (benzyl. C Bn), 61.0 (C-22), 55.9, 53.6, 46.7 (C-14), 42.6, 41.1 (C-12), 38.8 (C-4), 38.4 (C-1), 38.2 (C-8), 37.5, 37.4, 31.0 (C-7), 29.9, 28.4 (C-2), 27.0 (C-11), 23.1 (C-15), 19.1 (C-19); HRMS ( $m/z$ ):  $[\text{M}+\text{Na}]^+$  calcd for  $\text{C}_{39}\text{H}_{47}\text{NO}_4\text{SNa}$ : 648.31180, found: 648.31193.

### 3.22 (–)-*N*-Bs-20-demethyl-bis-*exo*-cyclopamine **33**

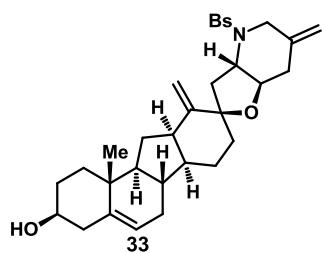

To a solution of *N*-Bs-*O*-Bn-20-demethyl-bis-*exo*-cyclopamine **18** (18.0 mg, 28.8  $\mu\text{mol}$ ) in 1,2-dichloroethane (2.3 mL) and pH 7 phosphate buffer (0.24 mL) 2,3-dichloro-5,6-dicyano-1,4-benzoquinone (52.0 mg, 229  $\mu\text{mol}$ ) was added in one portion at 44 °C. After stirring at this temperature for 50 min the reaction mixture was quenched with saturated aqueous  $\text{NaHCO}_3$  solution (5 mL) and the aqueous phase was extracted with  $\text{CH}_2\text{Cl}_2$  (2 x 5 mL). After drying ( $\text{MgSO}_4$ ) all

volatiles were removed under reduced pressure and the crude product was purified by column chromatography ( $\text{SiO}_2$ ; *n*-hexane/EtOAc, 7:1  $\rightarrow$  1:1 v/v) yielding pure **33** (6.1 mg, 9.9  $\mu\text{mol}$ , 34%) as a yellow oil and starting material **18** (8.5 mg, 12.1  $\mu\text{mol}$ ). The reisolated starting material was subjected twice to the above procedure for an overall yield of **33** of 10.8 mg, 20.2  $\mu\text{mol}$ , 70%; TLC (*n*-hexane/EtOAc, 1:1 v/v)  $R_F$  = 0.32;  $[\alpha]_D^{26}$  ( $\text{deg cm}^3 \text{ g}^{-1} \text{ dm}^{-1}$ ) =  $-13$  ( $c$  = 0.0104  $\text{g cm}^{-3}$  in  $\text{CHCl}_3$ ); IR ( $\text{CCl}_4$ ):  $\nu_{\text{max}}$  = 3388, 2925, 2855, 2360, 2341, 1732, 1635, 1445, 1385, 1171, 908, 787, 600  $\text{cm}^{-1}$ ;  $^1\text{H}$  NMR (400 MHz,  $\text{CDCl}_3$ )  $\delta$  7.76 (m, 2 H), 7.58 (m, 3 H), 5.36 (m, 1 H), 5.17 (s, 1 H), 5.09 (s, 1 H), 5.02 (s, 1 H), 4.86 (s, 1 H), 4.16 (d,  $J$  = 12.2 Hz, 1 H), 3.55 (m, 2 H), 2.78 (m, 3 H), 2.57 (m, 1 H), 2.36 (m, 1 H), 2.24 (m, 3 H), 2.07 (m, 2 H), 0.96 (s, 3 H, H-19);  $^{13}\text{C}$  NMR (100 MHz,  $\text{CDCl}_3$ )  $\delta$  153.7 (C-13), 142.0 (C-5), 137.7, 133.4 (para-C Bs), 129.4 (meta-C Bs), 128.1 (ortho-C Bs), 127.3, 122.3 (C-6), 116.2 (C-27), 108.3 (C-18), 85.7 (C-17), 78.7 (C-23), 72.1 (C-3), 61.1 (C-22), 54.7, 53.7, 46.8 (C-14), 42.6, 42.0, 41.2 (C-12), 38.4 (C-1), 38.3 (C-8), 37.5, 37.2, 31.6, 31.0 (C-7), 29.9, 27.1 (C-11), 23.1 (C-15), 19.1 (C-19); ESI-HRMS ( $m/z$ ):  $[\text{M}+\text{H}]^+$  calcd for  $\text{C}_{32}\text{H}_{42}\text{NO}_4\text{S}$ : 536.28291, found: 536.28294,  $[\text{M}+\text{Na}]^+$  calcd for  $\text{C}_{32}\text{H}_{41}\text{NO}_4\text{SNa}$ : 558.26485, found: 558.26470,  $[\text{2M}+\text{Na}]^+$  calcd for  $\text{C}_{64}\text{H}_{82}\text{N}_2\text{O}_8\text{S}_2\text{Na}$ : 1093.54048 found: 1093.54091.

### 3.23 (–)-20-Demethyl-bis-*exo*-cyclopamine **19**

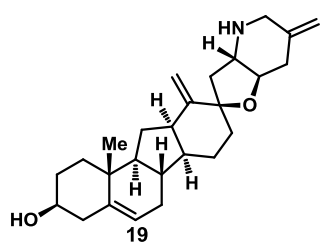

*O*-Bn-20-demethyl-bis-*exo*-cyclopamine **33** (10.0 mg, 18.7  $\mu\text{mol}$ ) was dissolved in 1,2-dimethoxyethane (2.0 mL) and the solution was cooled to  $-78$  °C. Under stirring sodium naphthalenide (0.5 M in 1,2-dimethoxyethane) (125  $\mu\text{L}$ , 62.5  $\mu\text{mol}$ ) (freshly prepared by adding sodium (5.70 mg, 0.25 mmol) to a solution of naphthalene (38.5 mg, 0.30 mmol) in 1,2-dimethoxyethane (0.50 mL) and stirring for 1 h until a deep green solution had formed) was added

in one portion. After stirring for 30 min saturated aqueous  $\text{NaHCO}_3$  solution (5 mL) was added and after warming to room temperature the mixture was extracted with  $\text{CH}_2\text{Cl}_2$  (5 x 5 mL) and dried ( $\text{Na}_2\text{SO}_4$ ). The solvents were removed under reduced pressure and the resulting crude was purified by column chromatography ( $\text{CHCl}_3/\text{EtOH}/\text{NH}_3$  (25% aq.), 99:1:0.5, v/v/v) to yield **19** (7.00 mg, 9.59  $\mu\text{mol}$ , 95%); TLC ( $\text{CHCl}_3/\text{EtOH}/\text{NH}_3$  (25% aq.), 99:1:0.5, v/v/v),  $R_F$  = 0.26;  $[\alpha]_D^{23}$  ( $\text{deg cm}^3 \text{ g}^{-1} \text{ dm}^{-1}$ ) =  $-17$  ( $c$  = 0.0079  $\text{g cm}^{-3}$  in  $\text{CHCl}_3$ ); IR ( $\text{CCl}_4$ ):  $\nu_{\text{max}}$  = 3433, 2923, 2852, 1742, 1646, 1384  $\text{cm}^{-1}$ ;  $^1\text{H}$  NMR (400 MHz,  $\text{CDCl}_3$ )  $\delta$  5.35 (m, 2 H, H-18, H-6), 5.02 (m, 2 H, H-27, H-27), 4.93 (s, 1 H, H-18), 3.62 (d,  $J$  = 13.8 Hz, 1 H, H-26), 3.52 (tt,  $J$  = 10.8, 4.4 Hz, 1H), 3.44 (ddd,  $J$  = 11.5, 9.4, 4.2 Hz, 1H, H-23), 3.38 (d,  $J$  = 13.8 Hz, 1 H, H-26), 2.89 (dd,  $J$  = 12.2, 4.3 Hz, 1 H, H-24), 2.80 (m, 1 H, H-22), 2.74 (m, 1 H, H-12), 2.37 (m, 2 H, H-24, H-4), 2.30 (dd,  $J$  = 11.4, 6.5 Hz, 1H, H-20), 2.20 (m, 1 H, H-4), 2.11 (m, 1 H, H-7), 1.85 (m, 3 H, H-2, H-11, H-16), 1.73 (m, 5 H, H-20, H-16, H-11, H-15, H-1), 1.61 (m, 2 H, H-14, H-7), 1.51 (m, 2 H, H-15, H-2), 1.39 (m, 1 H, H-8), 1.33 (m, 1 H, H-9), 1.16 (m, 1 H, H-1), 0.97 (s, 3H, H-19);  $^{13}\text{C}$  NMR (100 MHz,  $\text{CDCl}_3$ )  $\delta$  153.4 (C-13), 142.1 (C-5), 140.2 (C-25), 122.1 (C-6), 115.4

(C-27), 108.6 (C-18), 85.9 (C-17), 78.9 (C-23), 72.0 (C-3), 60.6 (C-22), 53.7 (C-9), 52.5 (C-26), 46.7 (C-14), 42.0 (C-4), 41.3 (C-12), 40.9 (C-20), 39.4 (C-24), 38.4 (C-1), 38.2 (C-8), 37.4 (C-10), 37.2 (C-16), 31.6 (C-2), 31.0 (C-7), 26.9 (C-11), 23.1 (C-15), 19.1 (C-19); ESI-HRMS ( $m/z$ ):  $[M+H]^+$  calcd for  $C_{26}H_{38}NO_2$ : 396.28971, found: 396.28950.

### 3.24 (–)-Furan **20**

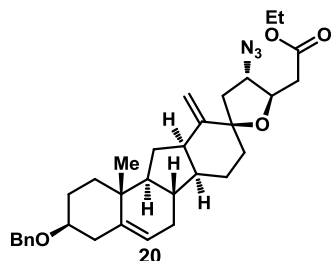

Finely ground bariumhydroxide octahydrate (336 mg, 1.06 mmol) was activated in a constant stream of dry argon at 140 °C. The powder was allowed to cool to room temperature and after adding a solution of triethyl phosphonoacetate (537 mg, 2.40 mmol) in THF (7.0 mL), the suspension was warmed to 60 °C under vigorous stirring for 45 min and thereafter sonicated for 10 min at room temperature. A solution of lactol **31** (126 mg, 0.266 mmol) in THF/H<sub>2</sub>O (7.0 mL, 40:1) was introduced in one portion and after sonicating for 10 min, the reaction mixture was brought to reflux and THF was evaporated slowly over the course of 12 h (by inserting a fine cannula through a septum, oil bath temperature 80 °C). The remaining viscous orange oil was dissolved in EtOAc (30 mL), washed with saturated aqueous NH<sub>4</sub>Cl solution (15 mL) and the phases were separated. The aqueous phase was extracted with EtOAc (15 mL) and the combined organic phases were washed with brine (15 mL), dried (MgSO<sub>4</sub>) and all volatiles were removed under reduced pressure. Column chromatography (SiO<sub>2</sub>; *n*-hexane/EtOAc, 7:1 *v/v*) yielded pure **20** (80.3 mg, 0.147 mmol, 55%) as a colorless oil; TLC (*n*-hexane/EtOAc, 6:1 *v/v*):  $R_F$  = 0.43;  $[\alpha]_D^{22}$  (deg cm<sup>3</sup> g<sup>–1</sup> dm<sup>–1</sup>) = –15 ( $c$  = 0.0100 g cm<sup>–3</sup> in CHCl<sub>3</sub>); IR (CCl<sub>4</sub>):  $\nu_{\max}$  2103, 1736, 735, 697 cm<sup>–1</sup>; <sup>1</sup>H NMR (400 MHz, CDCl<sub>3</sub>)  $\delta$  7.35 (m, 2 H, ortho-H Bn), 7.33 (m, 2 H, meta-H Bn), 7.28 (m, 1 H, para-H Bn), 5.35 (m, 1 H, H-6), 5.28 (m, 1 H, H-18), 4.85 (m, 1 H, H-18), 4.56 (s, 2 H, benzyl. H), 4.18 (m, 1 H, H-22), 4.17 (q,  $J$  = 7.1 Hz, 2 H, CH<sub>2</sub> Et), 3.82 (q,  $J$  = 7.2 Hz, 1 H, H-21), 3.28 (tt,  $J$  = 11.1, 4.5 Hz, 1 H, H-3), 2.68 (m, 1 H, H-12), 2.65 (m, 2 H, H-23), 2.49 (ddd,  $J$  = 13.1, 4.6, 2.0 Hz, 1 H, H-4), 2.31 (m, 1 H, H-20), 2.25 (m, 1 H, H-4), 2.11 (m, 1 H, H-7), 1.99 (m, 1 H, H-20), 1.95 (m, 1 H, H-2), 1.81 (m, 1 H, H-11), 1.77 (m, 1 H, H-16), 1.76 (m, 1 H, H-1), 1.74 (m, 1 H, H-16), 1.72 (m, 1 H, H-11), 1.65 (m, 1 H, H-15), 1.60 (m, 2 H, H-7, H-14), 1.56 (m, 1 H, H-2), 1.51 (m, 1 H, H-15), 1.36 (m, 1 H, H-8), 1.33 (m, 1 H, H-9), 1.28 (t,  $J$  = 7.1 Hz, 3 H, CH<sub>3</sub> Et), 1.12 (dt,  $J$  = 13.6, 3.6 Hz, 1 H, H-1), 0.98 (s, 3 H, H-19); <sup>13</sup>C NMR (175 MHz, CDCl<sub>3</sub>)  $\delta$  170.5 (C-24), 152.9 (C-13), 142.2 (C-5), 139.2 (ipso-C Bn), 128.5 (meta-C Bn), 127.7 (ortho-C Bn), 127.5 (para-C Bn), 122.0 (C-6), 107.4 (C-18), 85.6 (C-17), 78.8 (C-3), 78.0 (C-22), 70.1 (benzyl. C Bn), 64.1 (C-21), 60.9 (CH<sub>2</sub> Et), 53.7 (C-9), 46.1 (C-14), 42.1 (C-20), 41.9 (C-12), 38.8 (C-23), 38.7 (C-4), 38.4 (C-8), 38.3 (C-1), 37.5 (C-10), 36.7 (C-16), 31.1 (C-7), 28.3 (C-2), 26.8 (C-11), 23.7 (C-15), 19.1 (C-19), 14.3 (CH<sub>3</sub> Et); HRMS ( $m/z$ ):  $[M+Na]^+$  calcd for C<sub>33</sub>H<sub>43</sub>N<sub>3</sub>O<sub>4</sub>Na: 568.31567, found: 568.31524,  $[2M+Na]^+$  calcd for C<sub>66</sub>H<sub>86</sub>N<sub>6</sub>O<sub>8</sub>Na: 1113.63698, found: 1113.63753.

### 3.25 (+)-Sulfonamide **21**

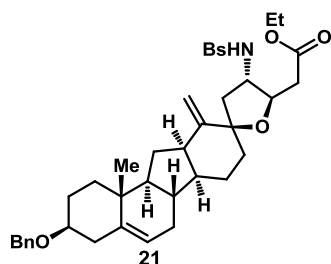

A solution of the furan **20** (103.0 mg, 155.0  $\mu\text{mol}$ ) in THF (7 mL) was treated sequentially with  $\text{H}_2\text{O}$  (34  $\mu\text{L}$ , 0.189 mmol) and triphenylphosphine (28.8 mg, 110.0  $\mu\text{mol}$ ) under stirring at room temperature. The solution was warmed to 50  $^\circ\text{C}$  and kept there for 24 h. After allowing it to cool to room temperature, all volatiles were evaporated and the crude amine was azeotroped with THF (10 mL) two times. After drying at 0.01 mbar pressure for 10 h, the crude amine was dissolved in  $\text{CH}_2\text{Cl}_2$  (6 mL) and cooled to 0  $^\circ\text{C}$ . Triethylamine (126  $\mu\text{L}$ , 786  $\mu\text{mol}$ ) and benzenesulfonyl chloride (97  $\mu\text{L}$ , 755  $\mu\text{mol}$ ) were added sequentially and the mixture was heated to reflux for 5 h. The solution was cooled to room temperature, diluted with  $\text{CH}_2\text{Cl}_2$  (20 mL) and washed with saturated aqueous  $\text{NH}_4\text{Cl}$  solution (10 mL). The phases were separated and the aqueous layer was extracted with  $\text{CH}_2\text{Cl}_2$  (10 mL). The combined organic extracts were washed with brine (10 mL), dried ( $\text{MgSO}_4$ ) and the volatiles were removed under reduced pressure. Column chromatography ( $\text{SiO}_2$ ; *n*-hexane/EtOAc, 3:1 v/v) yielded pure **21** (86 mg, 111  $\mu\text{mol}$ , 97%) as a colorless oil; TLC (*n*-hexane/EtOAc, 3:1 v/v):  $R_F$  = 0.25;  $[\alpha]_D^{26}$  ( $\text{deg cm}^3 \text{g}^{-1} \text{dm}^{-1}$ ) = +2 ( $c$  = 0.0134  $\text{g cm}^{-3}$  in  $\text{CHCl}_3$ ); IR ( $\text{CCl}_4$ ):  $\nu_{\text{max}}$  2924, 2359, 2340, 1632, 1453, 1384, 1164, 1093, 689  $\text{cm}^{-1}$ ;  $^1\text{H}$  NMR (300 MHz,  $\text{CDCl}_3$ )  $\delta$  7.86 (d,  $J$  = 6.9 Hz, 2 H), 7.61 (t,  $J$  = 7.2 Hz, 1 H), 7.51 (t,  $J$  = 7.2 Hz, 2 H),  $\delta$  7.35 (m, 2 H), 7.33 (m, 2 H), 7.28 (m, 1 H), 5.39 (d,  $J$  = 5.4 Hz, 1 H), 5.34 (m, 1 H), 5.16 (s, 1 H), 4.81 (s, 1 H), 4.56 (s, 2 H), 4.14 (m, 1 H), 4.08 (q,  $J$  = 7.1 Hz, 2 H), 3.40 (q,  $J$  = 7.2 Hz, 1 H), 3.28 (tt,  $J$  = 11.1, 4.5 Hz, 1 H), 2.60 (m, 1 H), 2.65 (m, 2 H), 2.49 (ddd,  $J$  = 13.1, 4.6, 2.0 Hz, 1 H), 2.31 (m, 1 H), 2.25 (m, 1 H), 2.11 (m, 1 H), 1.12 (dt,  $J$  = 13.6, 3.6 Hz, 1 H), 0.96 (s, 3 H);  $^{13}\text{C}$  NMR (75 MHz,  $\text{CDCl}_3$ )  $\delta$  171.7, 152.9, 139.2, 135.2, 133.2, 129.3, 128.5, 128.1, 127.7, 127.6, 122.0, 107.5, 85.4, 78.8, 78.0, 70.1, 61.1, 57.8, 53.7, 46.0, 44.2, 41.8, 38.7, 38.4, 38.3, 37.6, 37.1, 31.1, 28.3, 26.9, 23.6, 19.1, 14.3. ESI-HRMS ( $m/z$ ):  $[\text{M}+\text{Na}]^+$  calcd for  $\text{C}_{39}\text{H}_{49}\text{NO}_6\text{SNa}$ : 682.31783, found: 682.31728;  $[\text{2M}+\text{Na}]^+$  calcd for  $\text{C}_{78}\text{H}_{98}\text{NO}_{12}\text{S}_2$ : 1341.64589, found: 1341.64534.

### 3.26 (+)-Alcohol **34**

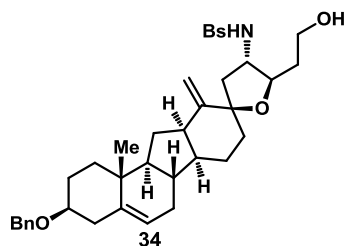

To a stirred solution of the sulfonamide **21** (50 mg, 76  $\mu\text{mol}$ ) in THF (7 mL) was added diisobutylaluminumhydride (1.2 M in toluene, 330  $\mu\text{L}$ , 312.8  $\mu\text{mol}$ ) dropwise at  $-78$   $^\circ\text{C}$  and stirring was continued at this temperature for 1 h and then at  $-40$   $^\circ\text{C}$  for 2 h. The reaction mixture was quenched with MeOH (31  $\mu\text{L}$ ), diluted with  $\text{CH}_2\text{Cl}_2$  (20 mL) and Rochelle-salt solution (10 wt % in  $\text{H}_2\text{O}$ , 20 mL) and warmed to room temperature. After stirring for 1 h the phases were separated and the aqueous layer was extracted with  $\text{CH}_2\text{Cl}_2$  (2 x 20 mL). The combined organic extracts were dried ( $\text{MgSO}_4$ ) and the volatiles were removed under reduced pressure. Column chromatography ( $\text{SiO}_2$ ; *n*-hexane/EtOAc, 2:1 v/v) yielded pure **34** (45.5 mg, 74  $\mu\text{mol}$ , 97%) as a colorless film; TLC (*n*-hexane/EtOAc, 1:1 v/v):  $R_F$  = 0.27;  $[\alpha]_D^{22}$  ( $\text{deg cm}^3 \text{g}^{-1} \text{dm}^{-1}$ ) = +4 ( $c$  = 0.0099  $\text{g cm}^{-3}$  in  $\text{CHCl}_3$ ); IR ( $\text{CCl}_4$ ):  $\nu_{\text{max}}$  3440, 2929, 2102, 1631, 1447, 1343, 1162, 1093, 788, 756  $\text{cm}^{-1}$ ;  $^1\text{H}$  NMR (300 MHz,  $\text{CDCl}_3$ ):  $\delta$  7.86 (d,  $J$  = 6.9 Hz, 2 H), 7.59 (t,  $J$  = 7.2 Hz, 1 H), 7.51 (t,  $J$  = 7.2 Hz, 2 H), 7.34 (m, 2 H), 7.33 (m, 2 H), 7.27 (m, 1 H), 5.50 (d,  $J$  = 7.4 Hz, 1 H), 5.32 (dd,  $J$  = 5.3, 2.6 Hz, 1 H), 5.19 (d,  $J$  = 2.3 Hz, 1 H), 4.81 (s, 1 H), 4.56 (s, 2 H), 3.79 (m, 1 H), 3.72 (t,  $J$  = 5.4 Hz, 2 H), 3.35 (m, 1 H), 3.27 (ddd,  $J$  = 11.0, 6.7, 4.4 Hz, 1 H), 2.57 (m, 1 H), 2.48 (ddd,  $J$  = 13.4, 4.8, 2.2 Hz, 1 H), 2.24 (m, 1 H), 2.20 (dd,  $J$  = 12.7, 7.4 Hz, 1 H), 1.96 (dt,  $J$  = 12.9, 3.4 Hz, 1 H), 1.11 (td,  $J$  = 13.5, 3.7 Hz, 1 H), 0.96 (s, 3 H);  $^{13}\text{C}$  NMR (100 MHz,  $\text{CDCl}_3$ )  $\delta$  152.9, 142.2, 140.3, 135.2, 133.2, 129.4,

128.5, 128.0, 127.7, 127.6, 122.0, 107.8, 85.5, 81.0, 78.8, 70.1, 67.8, 61.1, 57.6, 53.7, 46.1, 43.8, 41.7, 38.7, 38.4, 37.5, 37.4, 35.0, 31.1, 28.3, 26.9, 23.5, 19.1; ESI-HRMS ( $m/z$ ):  $[M+Na]^+$  calcd for  $C_{37}H_{47}NO_5Na$ : 640.30726, found: 640.30703.

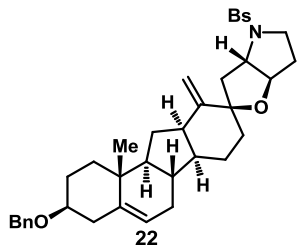

### 3.27 (+)-*N*-Bs-*O*-Bn-*F*-nor-20,25-bis-demethyl-*exo*-cyclopamine **22**

To a solution of alcohol **34** (20 mg, 32  $\mu$ mol) in toluene (1.6 mL) were added sequentially tributylphosphine (34.0  $\mu$ L, 134  $\mu$ mol) and diethyl azodicarboxylate (31.4 mg, 123  $\mu$ mol) at 0 °C. After warming to room temperature, stirring was continued for 24 h. Afterwards all volatiles were removed under reduced pressure. Column chromatography ( $SiO_2$ ; *n*-hexane/EtOAc, 6:1 v/v) yielded pure **22** (15.4 mg, 25.9  $\mu$ mol, 81%) as colorless plates; mp.: 133-135°C; TLC (*n*-hexane/EtOAc, 3:1 v/v):  $R_F$  = 0.36;  $[\alpha]_D^{24}$  (deg  $cm^3 g^{-1} dm^{-1}$ ) = +50 ( $c$  = 0.0099 g  $cm^{-3}$  in  $CHCl_3$ ); IR (KBr):  $\nu_{max}$  2925, 2884, 1718, 1446, 1347, 1175, 1092, 905, 798, 694, 598  $cm^{-1}$ ;  $^1H$  NMR (400 MHz,  $CDCl_3$ ):  $\delta$  7.78 (d,  $J$  = 6.9 Hz, 2 H, ortho-H Bs), 7.64 (t,  $J$  = 7.2 Hz, 1 H, para-H Bs), 7.56 (t,  $J$  = 7.2 Hz, 2 H, meta-H Bs), 7.35 (m, 2 H, ortho-H Bn), 7.32 (m, 2 H, meta-H Bn), 7.28 (m, 1 H, para-H Bn), 5.34 (m, 1 H, H-6), 5.20 (s, 1 H, H-18), 4.89 (s, 1 H, H-18), 4.57 (s, 2 H, benzyl. H), 4.09 (m, 1 H, H-22), 3.85 (q,  $J$  = 9 Hz, 1 H, H-23), 3.55 (t,  $J$  = 9 Hz, 1 H, H-23), 3.28 (tt,  $J$  = 11.1, 4.5 Hz, 1 H, H-3), 2.92 (m, 1H, H-21), 2.76 (m, 1 H, H-12), 2.49 (ddd,  $J$  = 13.1, 4.6, 2.0 Hz, 1 H, H-4), 2.34 (m, 1 H, H-19), 2.25 (m, 1 H, H-4), 2.08 (m, 1 H, H-7), 2.06 (m, 1 H, H-23), 1.95 (m, 1 H, H-2), 1.93 (m, 1 H, H-19), 1.81 (m, 1 H, H-11), 1.77 (m, 1 H, H-16), 1.76 (m, 1 H, H-1), 1.74 (m, 1 H, H-16), 1.72 (m, 1 H, H-11), 1.68 (m, 1 H, H-22), 1.65 (m, 1 H, H-15), 1.60 (m, 2 H, H-7, H-14), 1.58 (m, 1 H, H-2), 1.51 (m, 1 H, H-15), 1.36 (m, 1 H, H-8), 1.33 (m, 1 H, H-9), 1.12 (dt,  $J$  = 13.6, 3.6 Hz, 1 H, H-1), 0.96 (s, 3 H, H-19);  $^{13}C$  NMR (100 MHz,  $CDCl_3$ ):  $\delta$  154.9 (C-13), 142.2 (C-5), 139.2 (ipso-C Bn), 135.2 (ipso-C Bs), 133.2 (para-C Bs), 129.3 (meta-C Bs), 128.1 (ortho-C Bs), 128.5 (meta-C Bn), 127.7 (ortho-C Bn), 127.6 (para-C Bn), 122.0 (C-6), 108.5 (C-18), 96.6 (C-17), 82.9 (C-22), 78.8 (C-3), 70.1 (benzyl. C), 66.3 (C-21), 53.6 (C-9), 53.6 (C-23), 46.5 (C-14), 41.0 (C-12), 40.2 (C-20), 38.8 (C-4), 38.3 (C-19), 38.2 (C-8), 37.7 (C-1), 37.5 (C-10), 31.0 (C-16), 31.0 (C-7), 28.3 (C-2), 26.8 (C-13), 26.4 (C-11), 22.7 (C-15), 19.2 (C-19); HRMS ( $m/z$ ):  $[M+Na]^+$  calcd for  $C_{37}H_{45}NO_4SNa$ : 662.29670, found: 622.29614;  $[2M+Na]^+$  calcd for  $C_{74}H_{90}N_2O_8S_2Na$ : 1221.60163, found: 1221.60240.

### 3.28 (+)-*N*-Bs-*F*-nor-20,25-bis-demethyl-*exo*-cyclopamine **35**

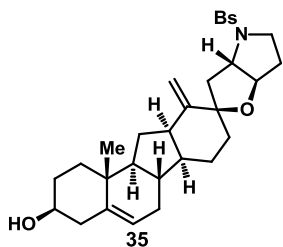

To a solution of *N*-Bs-*O*-Bn-*F*-nor-20,25-bis-demethyl-*exo*-cyclopamine **22** (14.4 mg, 24.0  $\mu$ mol) in 1.9 mL 1,2-dichloroethane and phosphate-buffer (0.2 mL, pH 7) was added 2,3-dichloro-5,6-dicyano-1,4-benzoquinone (43.7 mg, 192.5  $\mu$ mol) at 40 °C and the reaction was stirred for 30 min and then quenched with saturated aqueous  $NaHCO_3$  solution. The aqueous phase was extracted with  $CH_2Cl_2$  (3 x 5 mL), the combined organic layers were dried ( $MgSO_4$ ) and all volatiles were removed under reduced pressure. Column chromatography ( $SiO_2$ ; *n*-hexane/EtOAc, 6:1  $\rightarrow$  3:1 v/v) gave pure **35** (5.4 mg, 9.2  $\mu$ mol, 38%) as colorless crystals and starting material **22** (7.1 mg, 10.4  $\mu$ mol). The reisolated starting material was resubjected two more times to this reaction to give an overall yield of **35** of 8.9 mg, 14.9  $\mu$ mol, 62%; mp.: 186-189°C; TLC (*n*-hexane/EtOAc, 2:1 v/v):  $R_F$  = 0.18;  $[\alpha]_D^{22}$  (deg  $cm^3 g^{-1} dm^{-1}$ ) = +164 ( $c$  = 0.0082 g  $cm^{-3}$  in  $CHCl_3$ ); IR (KBr):  $\nu_{max}$  3444, 1635, 1350, 1170, 720, 601  $cm^{-1}$ ;  $^1H$  NMR (400



MHz, CDCl<sub>3</sub>)  $\delta$  7.78 (d,  $J$  = 6.9 Hz, 2 H, ortho-H Bs), 7.63 (t,  $J$  = 7.2 Hz, 1 H, para-H Bs), 7.56 (t,  $J$  = 7.2 Hz, 2 H, meta-H Bs), 5.36 (m, 1 H), 5.20 (s, 1 H), 4.89 (s, 1 H), 4.09 (m, 1 H), 3.84 (m, 1 H), 3.55 (m, 1 H), 3.52 (m, 1 H), 2.92 (m, 1H), 2.77 (m, 1 H), 2.37 (ddd,  $J$  = 13.1, 4.6, 2.0 Hz, 1 H), 2.32 (dd,  $J$  = 5.6, 11.2 Hz, 1 H), 2.20 (m, 1 H), 2.11 (m, 1 H), 2.04 (m, 1 H), 1.12 (dt,  $J$  = 13.6, 3.6 Hz, 1 H), 0.97 (s, 3 H); <sup>13</sup>C NMR (100 MHz, CDCl<sub>3</sub>):  $\delta$  152.9, 141.9, 135.3 (ipso-C Bs), 133.2 (para-C Bs), 129.3 (meta-C Bs), 128.1 (ortho-C Bs), 122.2, 108.6, 96.6, 82.9, 72.0, 66.3, 53.6, 53.6, 46.6, 41.9, 41.0, 40.2, 38.3, 38.2, 37.7, 37.1, 31.5, 31.0, 26.8, 26.4, 22.7, 19.2; ESI-HRMS (m/z): [M+Na]<sup>+</sup> calcd for C<sub>30</sub>H<sub>39</sub>NO<sub>4</sub>SNa: 532.24920, found: 532.24930.

### 3.29 (–)-F-nor-20,25-bis-demethyl-*exo*-cyclopamine **23**

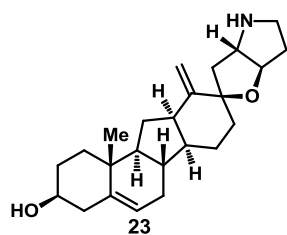

To a solution of *N*-Bs-F-nor-20,25-bis-demethyl-*exo*-cyclopamine **35** (5.9 mg, 16.1  $\mu$ mol) in 1,2-dimethoxyethane (1 mL) a freshly prepared sodium naphthalenide solution (0.5 M in 1,2-dimethoxyethane, 250  $\mu$ L, 125  $\mu$ mol) was added dropwise at  $-78^\circ\text{C}$ . After stirring for 40 min the reaction was quenched with saturated aqueous NaHCO<sub>3</sub> solution and the mixture was allowed to warm to room temperature. The aqueous phase was extracted with CH<sub>2</sub>Cl<sub>2</sub> (5 x 5 mL). The combined organic extracts were dried (Na<sub>2</sub>SO<sub>4</sub>), and all volatiles were removed under reduced pressure. Column chromatography (SiO<sub>2</sub>; CHCl<sub>3</sub>/EtOH/NH<sub>3</sub> (25% aq.), 95:2.5:0.5 v/v/v) yielded pure **23** (3.6 mg, 8.2  $\mu$ mol, 74%) as a colorless solid; m.p.: 205–215 $^\circ\text{C}$ ; TLC (CHCl<sub>3</sub>/MeOH/NH<sub>3</sub>(25% aq.), 95:5:0.5, v/v/v):  $R_F$  = 0.14; [ $\alpha$ ]<sub>D</sub><sup>22</sup> =  $-12$  ( $c$  = 0.0023 g cm<sup>-3</sup> in CHCl<sub>3</sub>); IR (KBr)  $\nu_{\text{max}}$ : 3433, 3255, 2925, 1631, 1454, 1399, 1261, 1094, 804, 544 cm<sup>-1</sup>; <sup>1</sup>H NMR (400 MHz, CDCl<sub>3</sub>)  $\delta$  5.39 (s, 1 H, H-18), 5.34 (m, 1 H, H-6), 4.93 (s, 1 H, H-18), 3.94 (ddd,  $J$  = 11.3, 9.5, 6.4 Hz, 1 H, H-22), 3.65 (m, 1 H, H-24), 3.55 (m, 1 H, H-24), 3.52 (m, 1 H, H-3), 3.16 (m, 1 H, H-21), 2.72 (m, 1 H, H-12), 2.36 (ddd,  $J$  = 12.9, 4.9, 2.3 Hz, 1 H, H-4), 2.21 (m, 1 H, H-4), 2.13 (m, 1 H, H-7), 2.10 (m, 1 H, H-20), 1.97 (m, 1 H, H-16), 1.93 (m, 1 H, H-23), 1.88 (m, 1 H, H-11), 1.86 (m, 2 H, H-16, H-2), 1.84 (m, 1 H, H-23), 1.75 (m, 1 H, H-11), 1.74 (m, 1 H, H-1), 1.72 (m, 1 H, H-15), 1.65 (m, 1 H, H-7), 1.63 (m, 1 H, H-20), 1.62 (m, 1 H, H-14), 1.55 (m, 1 H, H-2), 1.47 (m, 1 H, H-15), 1.37 (m, 1 H, H-8), 1.33 (m, 1 H, H-9), 1.17 (dt,  $J$  = 13.6, 3.7 Hz, 1 H, H-1), 0.98 (s, 3 H, H-19); <sup>13</sup>C NMR (100 MHz, CDCl<sub>3</sub>)  $\delta$  153.3 (C-13), 142.0 (C-5), 122.2 (C-6), 108.6 (C-18), 96.7 (C-17), 85.9 (C-22), 72.0 (C-3), 66.4 (C-21), 53.6 (C-9), 51.6 (C-24), 46.8 (C-14), 41.9 (C-4), 41.0 (C-12), 38.3 (C-1), 38.1 (C-8), 37.9 (C-23), 37.1 (C-10), 31.6 (C-2), 31.0 (C-7), 26.7 (C-11), 26.2 (C-16), 22.8 (C-15), 19.0 (C-19); ESI-HRMS (m/z): [M+H]<sup>+</sup> calcd for C<sub>24</sub>H<sub>36</sub>NO<sub>2</sub>: 370.27406, found: 370.27396.

#### 4. Biochemistry

The interference of the *exo*-cyclopamine derivatives with the hedgehog signaling pathway was tested in an established reporter gene assay [2] based on the inhibition of the target gene Gli1. Shh-LIGHTII cells (ATCC CRL-2795, LGC, Wesel, Germany) represent a clonal mouse fibroblast cell line (NIH 3T3), which stably incorporates a Gli-dependent firefly luciferase reporter and a constitutive Renilla luciferase reporter. They were grown in 75 cm<sup>3</sup> cell culture flasks at 37 °C in a humid atmosphere with 5% CO<sub>2</sub>. Cell growth medium DIMETHOXYETHANEM (Dulbecco's Modified Eagle's Medium, high glucose, sodium pyruvate, w/o glutamine), Zeocin<sup>TM</sup> Selection Reagent and Geneticin<sup>®</sup> Selection Antibiotic (G418 sulfate) were obtained from Invitrogen. Additive L-glutamin and trypsin were obtained from PAA. Versene<sup>TM</sup> chelating agent was obtained from Gibco, bovine fetal serum (FBS) from Sigma. The cell freeze medium contained 5% DMSO in complete growth medium. The cell number was counted using a Neubauer-Zählkammer (Hemocytometer). DIMETHOXYETHANEM (high glucose, sodium pyruvate, w/o glutamine) supplemented with 0.5% FBS, 4 mM L-glutamin and 50 mM HEPES buffer (4-(2-hydroxyethyl)-1-piperazine ethanesulfonic acid) (pH 7.4) was used as incubation medium. The measurement of reporter gene and constitutive Renilla luminescence was performed with the Dual Luciferase<sup>®</sup> reporter system according to the manufacturer's instructions (Promega, Mannheim, Germany) using a GENios reader (TECAN, Crailsheim, Germany).

#### **Luciferase reporter assay.**

##### **Incubation of cells.**

For performing the assay, Shh-LIGHTII cells were grown to reach 80% confluence, washed twice with Versene, detached with 2 mL trypsin for not longer than 2 min and resuspended in 8 mL of growth medium. After centrifugation for 3 min, the supernatant was removed and the cell pellet dissolved in approximately 10 mL of growth medium. Finally, 20,000 to 100,000 cells per well were cultured in a 24-well plate for 48 h. For exposure to the derivatives the growth medium was removed and the cells were exposed to the compound in 500 µL/well incubation medium for 48 h. Stock solutions were prepared in EtOH and introduced in different concentrations into the incubation medium to reach a final solvent concentration of 0.05%. Due to the assay principle, Shh-LIGHTII cells had to be co-exposed to 100 nM of SAG (Smoothed agonist) for determining the inhibitory activity of the compounds. A SAG stock solution was prepared in EtOH and introduced into the medium. The final EtOH concentration – introduced by SAG and the test compound – was 0.1%. As a positive control a 100 nM SAG solution in incubation medium (0.1% EtOH) was used, negative controls were treated with EtOH only.

##### **Performing the luciferase measurement.**

After 48 h of incubation cells were washed with 500 µL PBS (phosphate buffered saline, w Mg/Ca, Invitrogen) and afterwards incubated for 15 min with 100 µL 1 x passive lysis buffer on a shaker. The lysed cells together with lysis solution were transferred into 1.5 mL reaction tubes, centrifuged for 1 min at 4 °C and kept on ice until further use. At first, the blank of luminescence of a 96-well plate (flat bottom, white, Greiner bio-one) was recorded. Then, 100 µL luciferase assay reagent and 10 µL cell supernatant were mixed per well and the luminescence of firefly luciferase was recorded. Addition of 100 µL Stop&Glo<sup>®</sup> reagent permitted the recording of Renilla luminescence. The measurement was performed per row of a well, i.e. assay reagent was added to

8 wells and luminescence recorded, before the next row was proceeded. Analysis of constitutive Renilla luminescence was used to normalize for any potential unspecific Gli1-reporter gene luminescence.

#### **Evaluation of IC<sub>50</sub>.**

For determination of IC<sub>50</sub> values, the relative luminescence units per second RLU/s (relative luminescence units per second, quotient of firefly and Renilla luminescence) were plotted against the inhibitor concentrations on a log<sub>10</sub> scale. Each test was performed three times with three replicates per concentration.

#### **5. References**

[1] Giannis, A.; Heretsch, P.; Sarli, V.; Stöbel, A.; *Angew. Chem. Int. Ed.* **2009**, *48* (42), 7911–7914.

doi: 10.1002/anie.200902520

[2] Taipale, J.; Chen, J. K.; Cooper, M. K.; Wang, B.; Mann, R. K.; Milenkovic, L.; Scott M. P.; Beachy, P. A. *Nature*, **2000**, *406* (6799), 1005–1009.

doi:10.1038/35023008

## 6. NMR Spectra

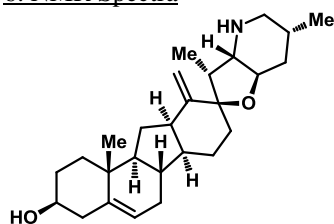

5

$^1\text{H}$  NMR (300 MHz,  $\text{CDCl}_3$ )

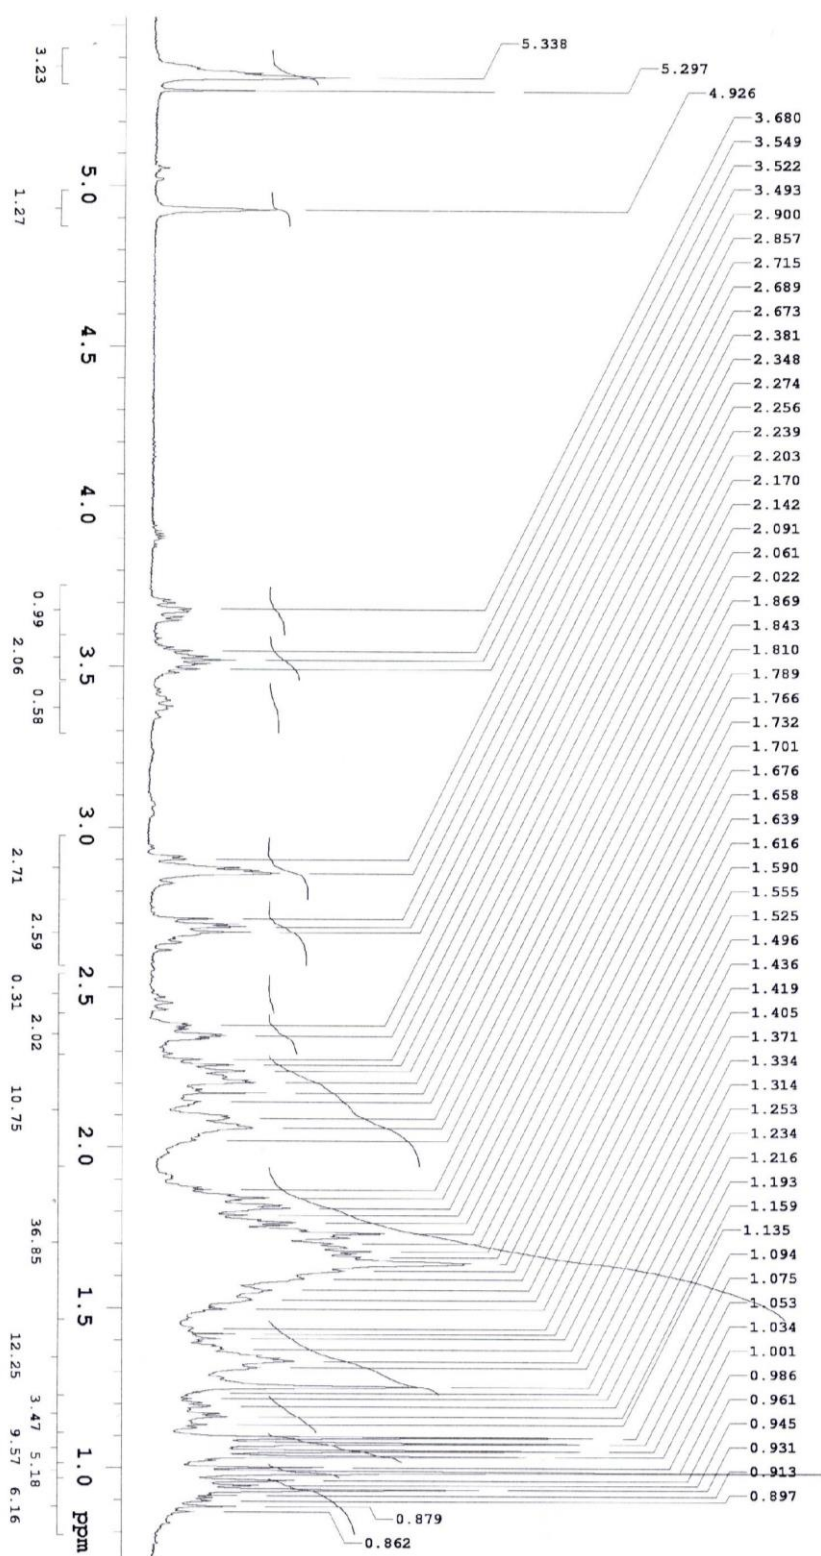

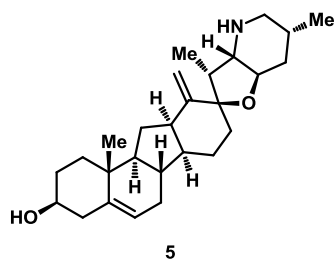

$^{13}\text{C}$  NMR (100 MHz,  $\text{CDCl}_3$ )

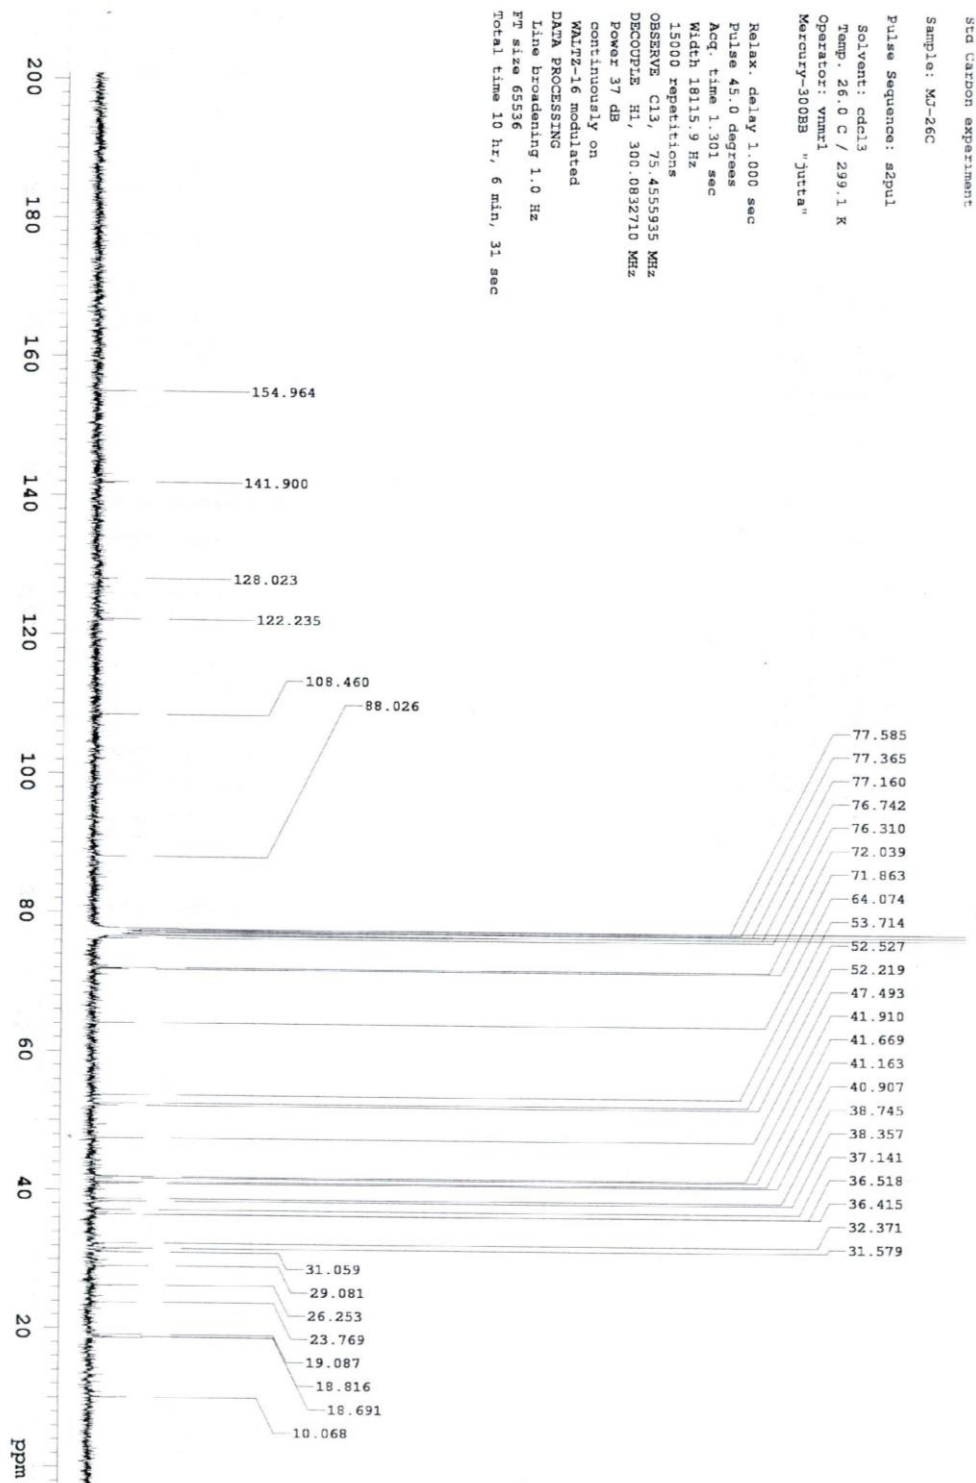

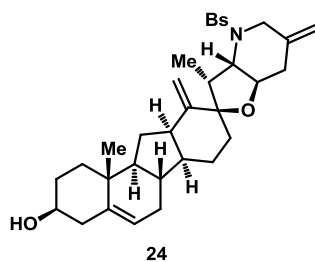

$^1\text{H}$  NMR (300 MHz,  $\text{CDCl}_3$ )

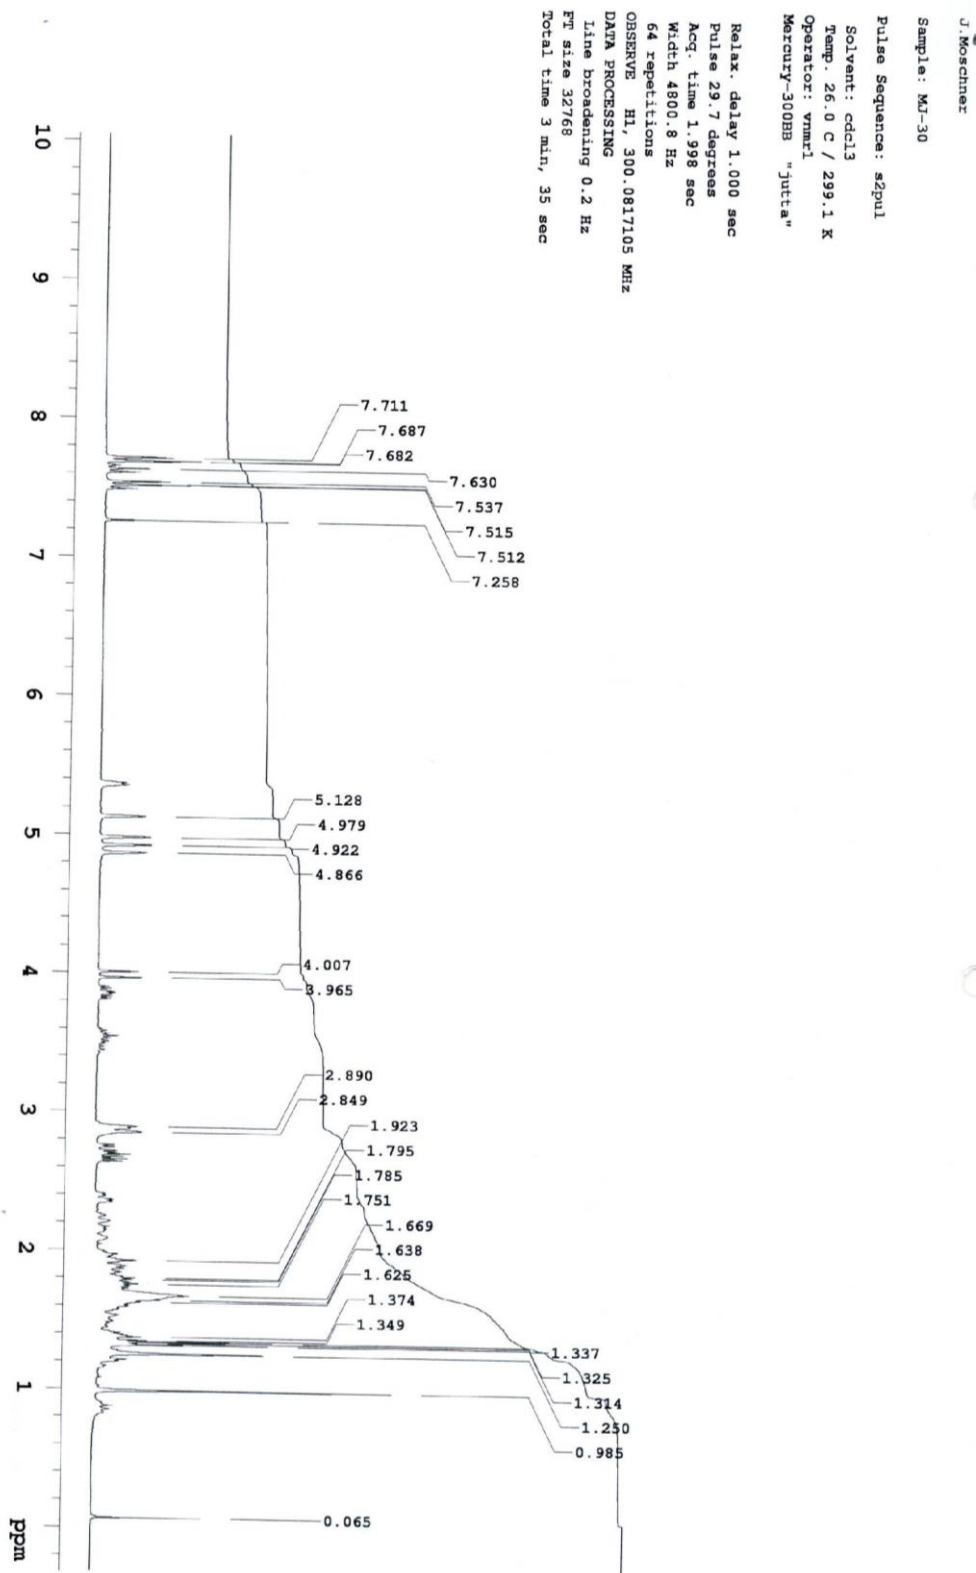

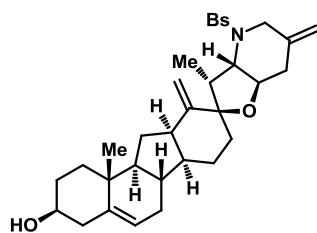

24

$^{13}\text{C}$  NMR (100 MHz,  $\text{CDCl}_3$ )

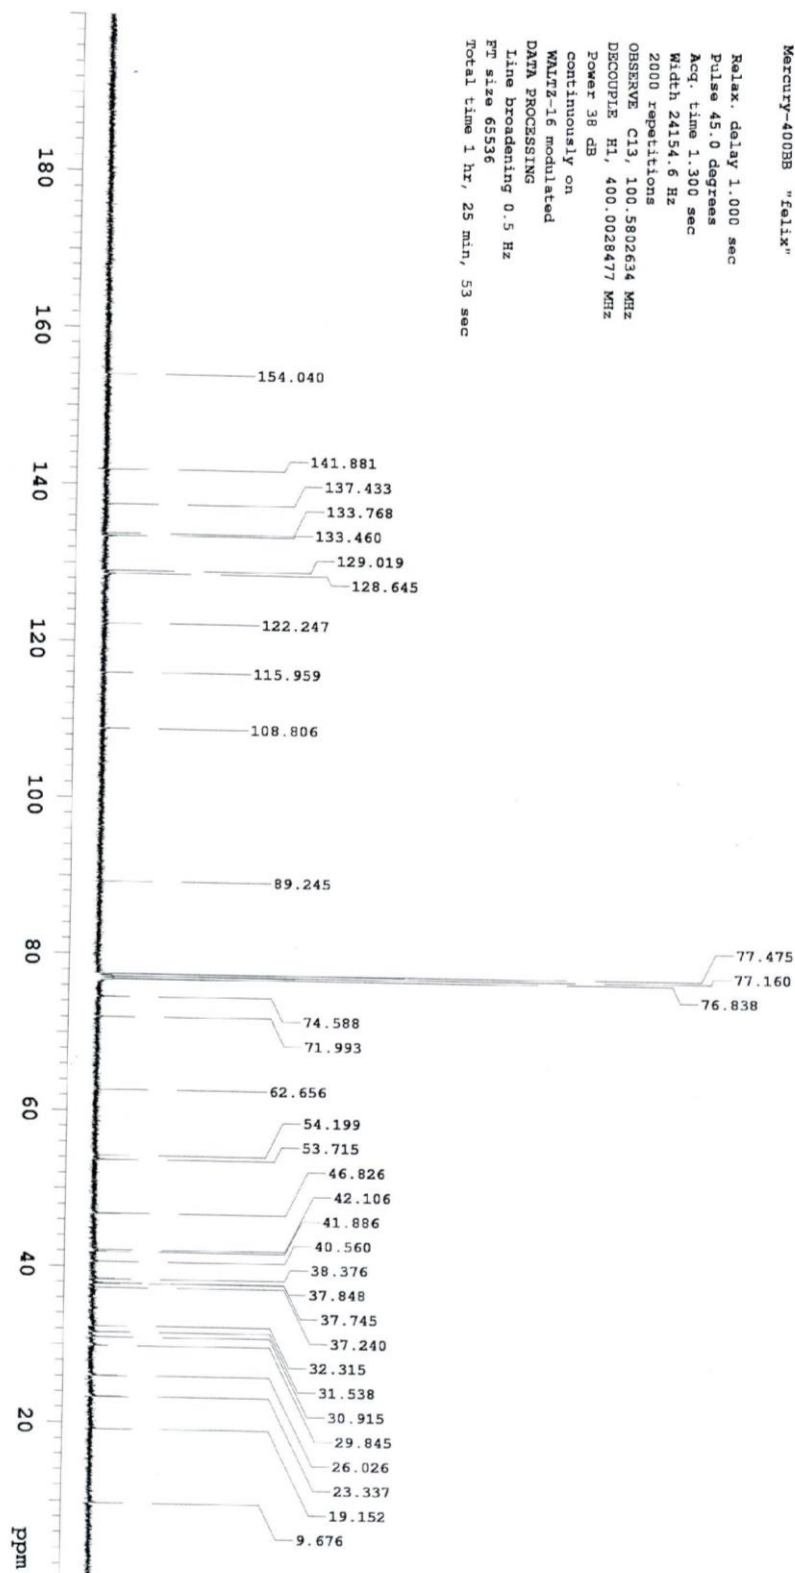

Sample: M7-30  
Pulse Sequence: zgpg30  
Date: Jun 22 2011  
Solvent: cdcl3  
Temp: 26.0 C / 299.1 K  
Operator: walkup  
Mercury-400BB "felix"  
Relax. delay 1.000 sec  
Pulse 45.0 degrees  
Acq. time 1.300 sec  
Width 24154.6 Hz  
2000 repetitions  
OBSERVE C13, 100.5802634 MHz  
DECOUPLE H1, 400.0028477 MHz  
Power 38 dB  
continuously on  
WALTZ-16 modulated  
DATA PROCESSING  
Line broadening 0.5 Hz  
FT size 65536  
Total time 1 hr, 25 min, 53 sec

J. Moschner

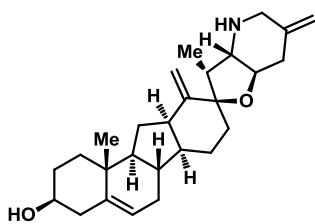

6

$^1\text{H}$  NMR (300 MHz,  $\text{CDCl}_3$ )

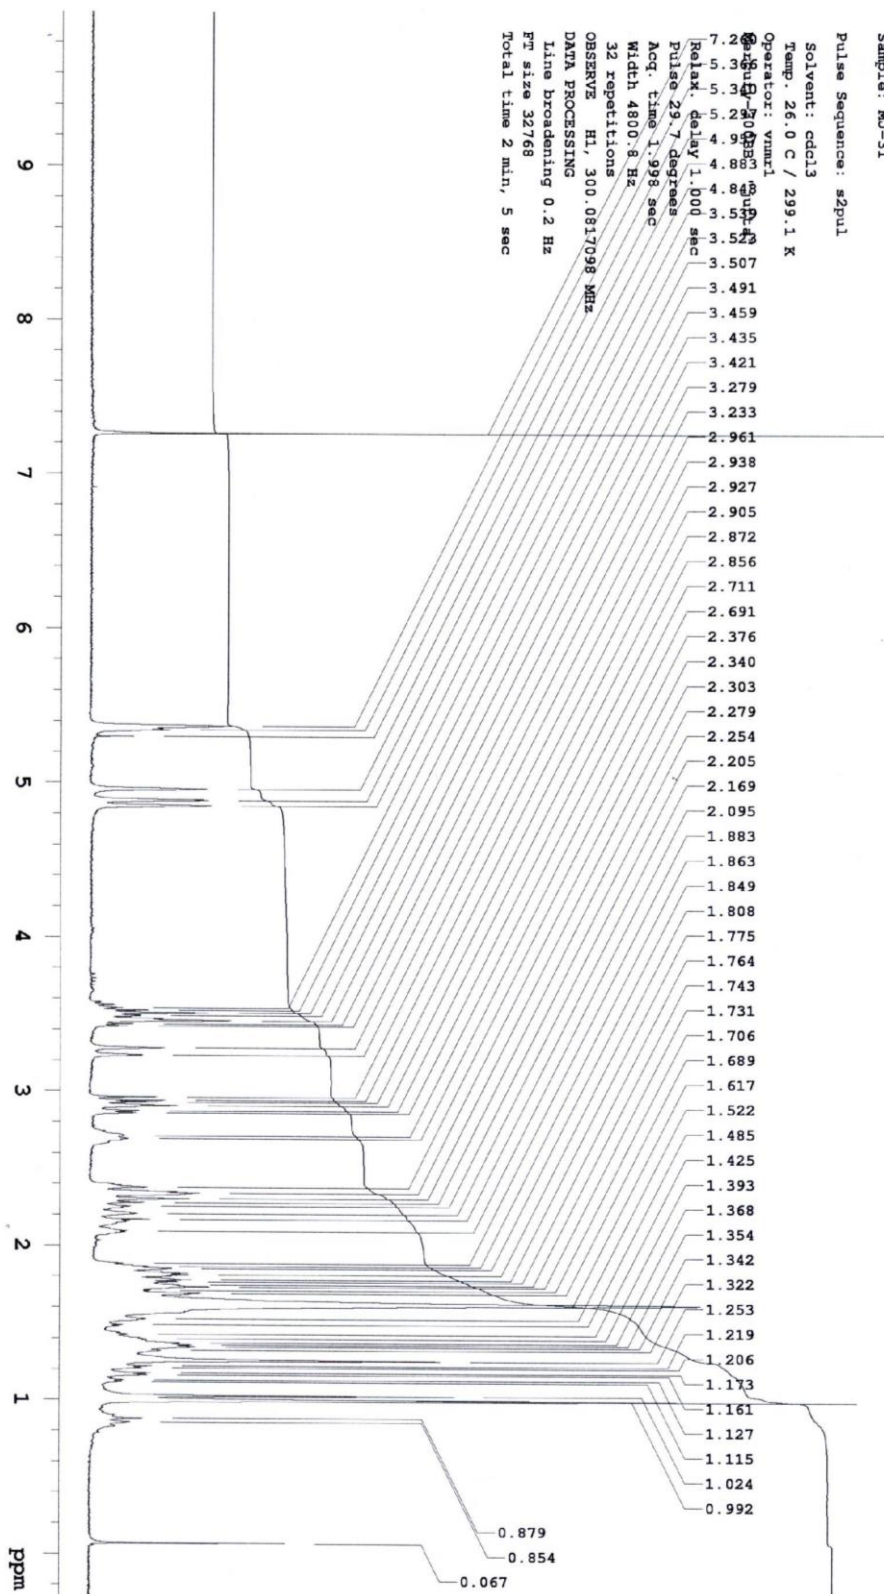

Std Proton parameters  
J. Moschner

Sample: MJ-31

Pulse Sequence: szpul

Solvent:  $\text{cdcl}_3$

Temp. 26.0 C / 299.1 K

Operator: vnmr1

Acq. time 1.998 sec

Width 4800.8 Hz

32 repetitions

Relax. delay 1.000 sec

Pulse 29.7 degrees

Acq. time 1.998 sec

Width 4800.8 Hz

32 repetitions

Relax. delay 1.000 sec

Pulse 29.7 degrees

Acq. time 1.998 sec

Width 4800.8 Hz

32 repetitions

Relax. delay 1.000 sec

Pulse 29.7 degrees

Acq. time 1.998 sec

Width 4800.8 Hz

32 repetitions

Relax. delay 1.000 sec

Pulse 29.7 degrees

Acq. time 1.998 sec

Width 4800.8 Hz

32 repetitions

Relax. delay 1.000 sec

Pulse 29.7 degrees

Acq. time 1.998 sec

Width 4800.8 Hz

32 repetitions

Relax. delay 1.000 sec

Pulse 29.7 degrees

Acq. time 1.998 sec

Width 4800.8 Hz

32 repetitions

Relax. delay 1.000 sec

Pulse 29.7 degrees

Acq. time 1.998 sec

Width 4800.8 Hz

32 repetitions

Relax. delay 1.000 sec

Pulse 29.7 degrees

Acq. time 1.998 sec

Width 4800.8 Hz

32 repetitions

Relax. delay 1.000 sec

Pulse 29.7 degrees

Acq. time 1.998 sec

Width 4800.8 Hz

32 repetitions



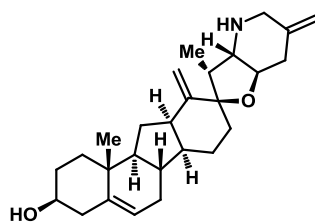

6

APT (100 MHz, CDCl<sub>3</sub>)

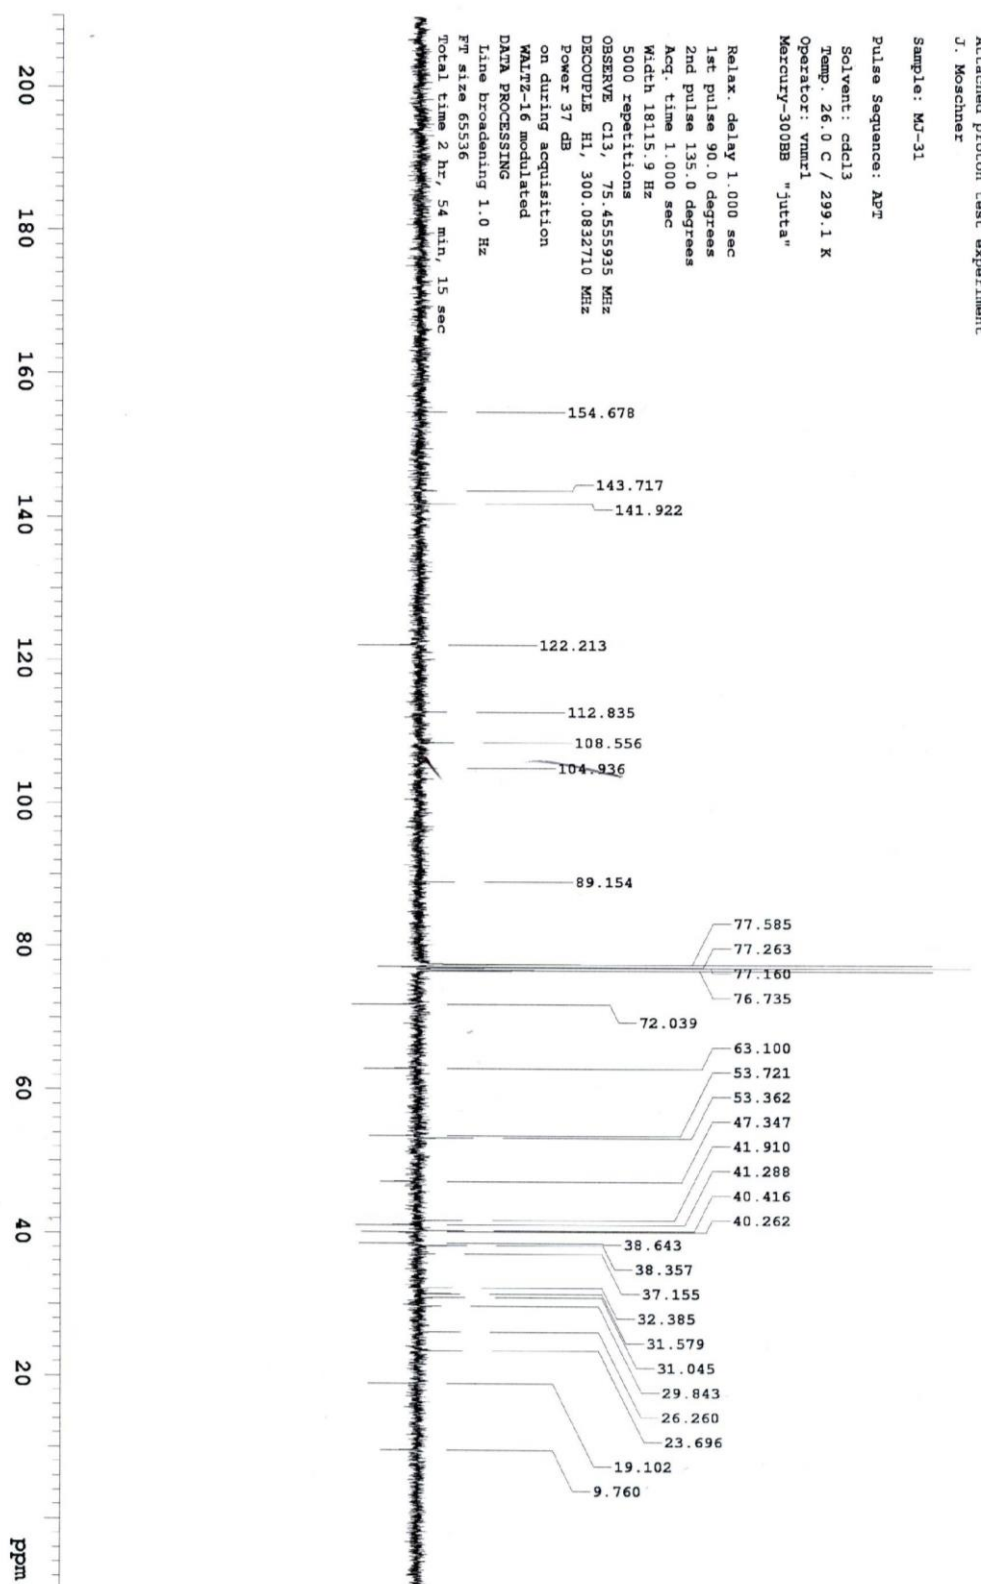

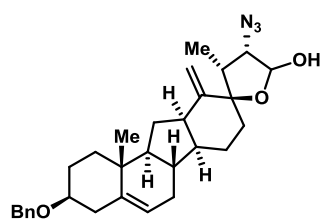

25

$^1\text{H}$  NMR (300 MHz,  $\text{CDCl}_3$ )

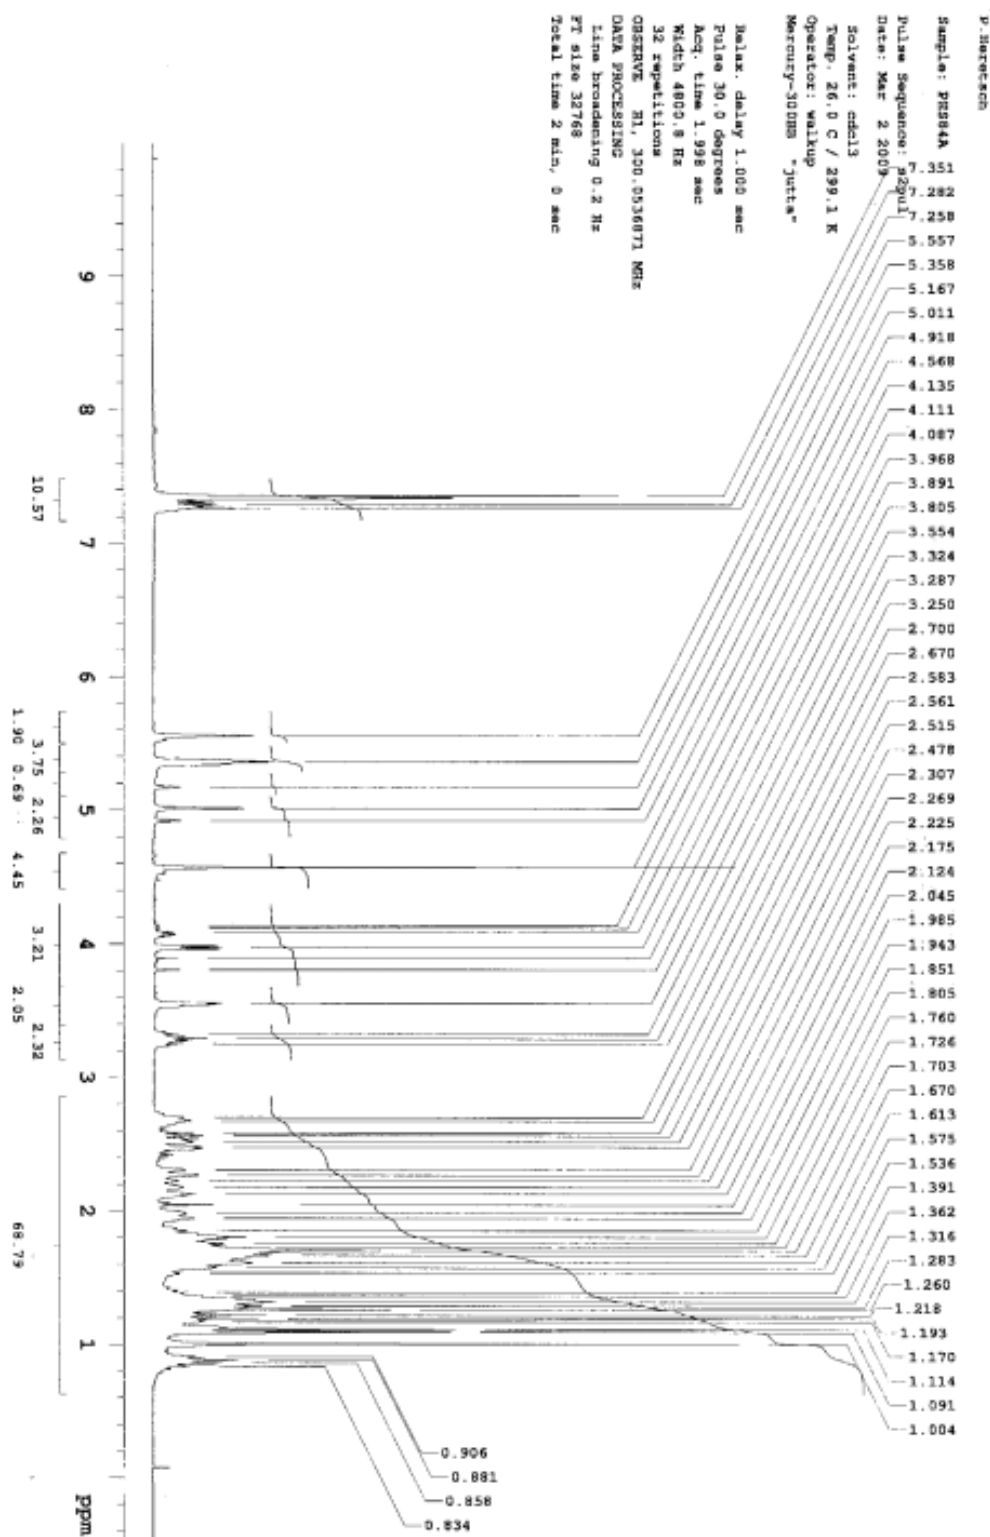

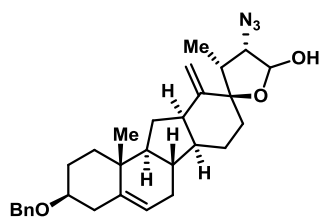

25

$^{13}\text{C}$  NMR (75 MHz,  $\text{CDCl}_3$ )

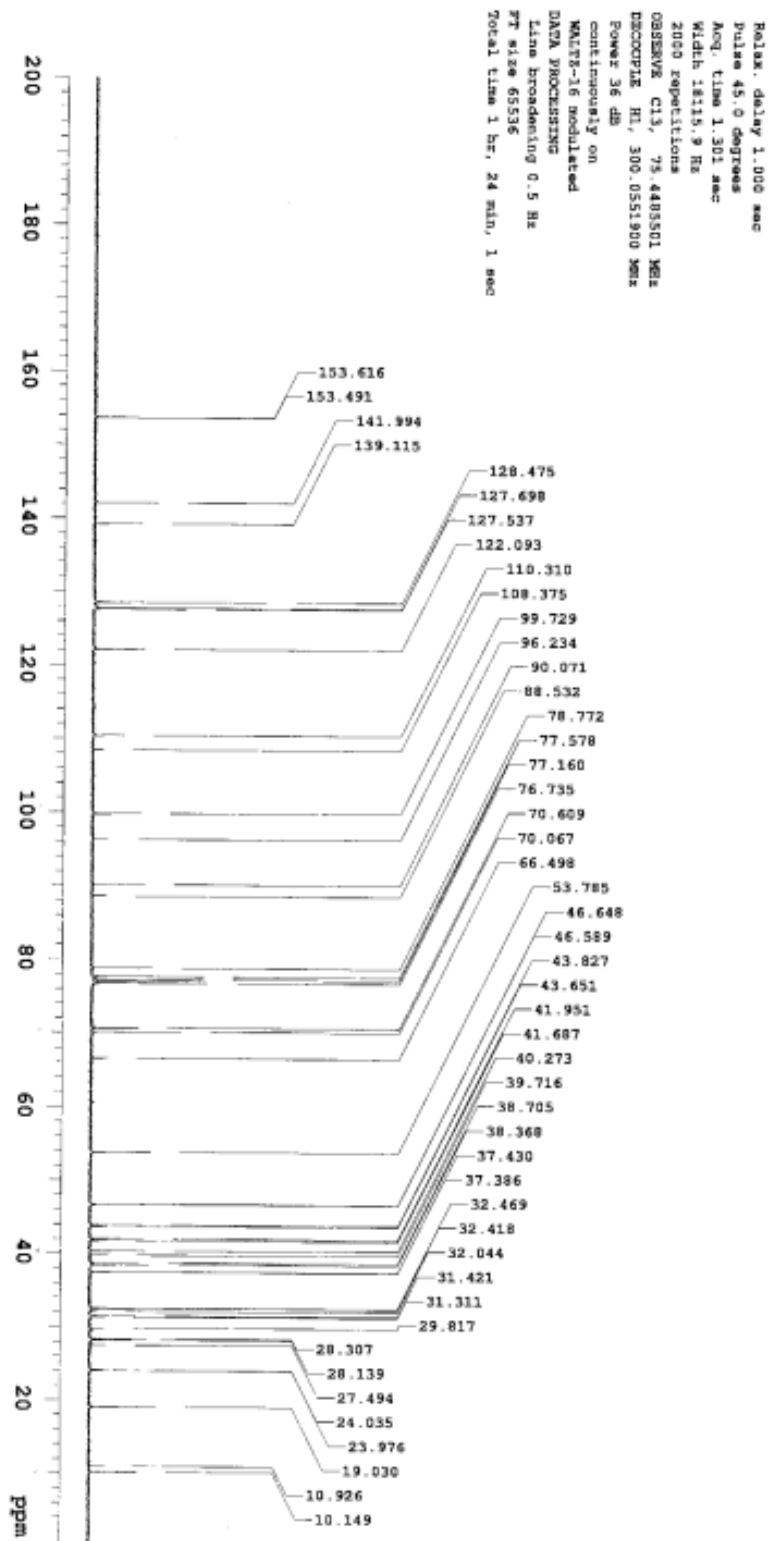

J. Baran  
Sample: 25254  
Pulse Sequence: zgpg30  
Date: Mar 2 2009  
Solvent: cdcl3  
Temp. 26.0 C / 299.1 K  
Operator: walkup  
Mercury-300DM "Jetta"

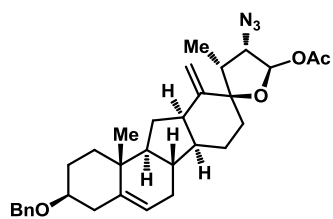

26

<sup>1</sup>H NMR (400 MHz, CDCl<sub>3</sub>)

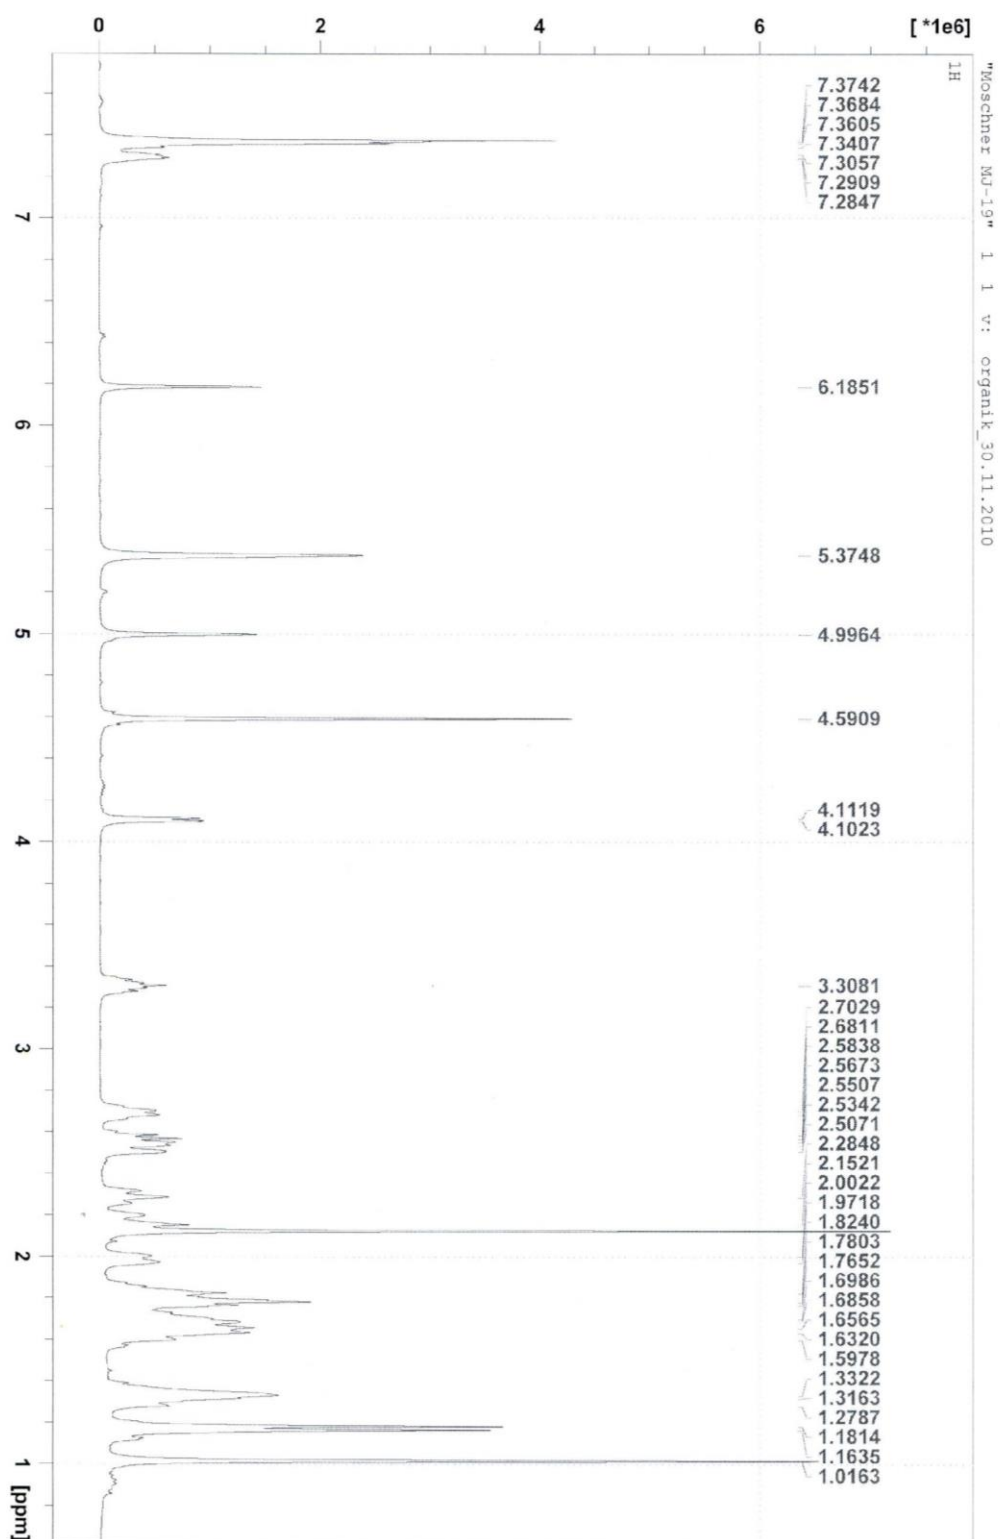

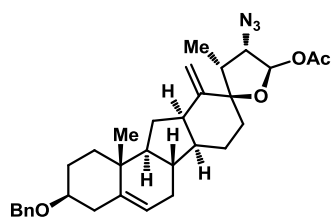

26

<sup>13</sup>C NMR (100 MHz, CDCl<sub>3</sub>)

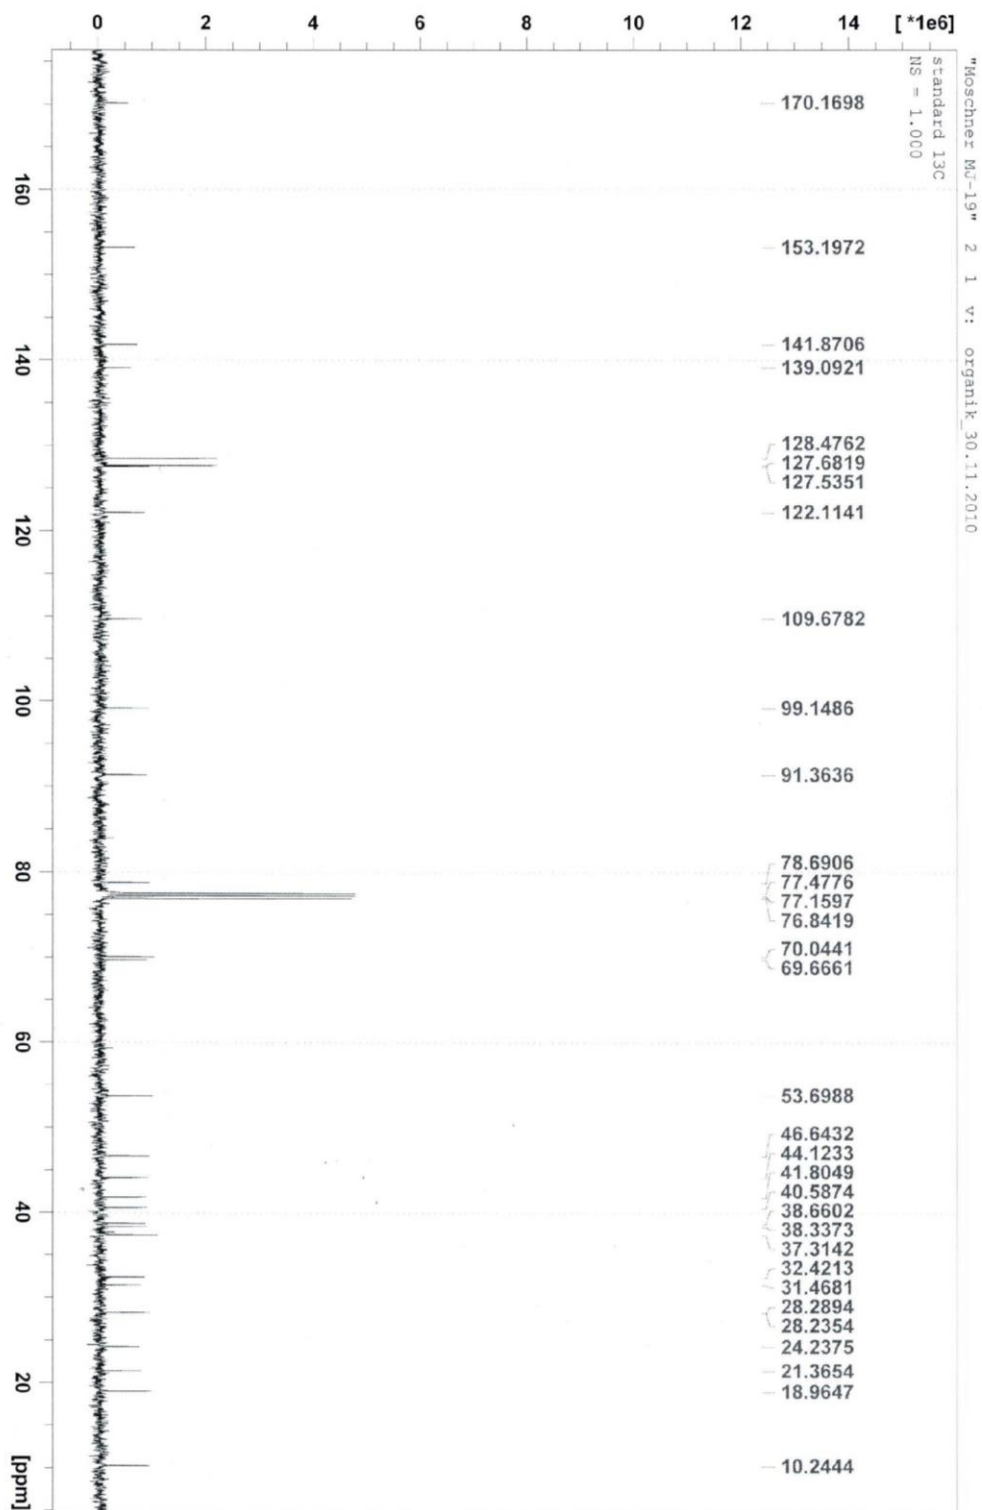

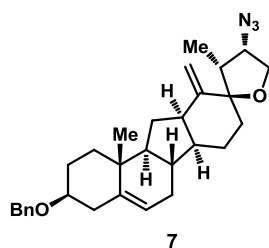

$^1\text{H}$  NMR (400 MHz,  $\text{CDCl}_3$ )

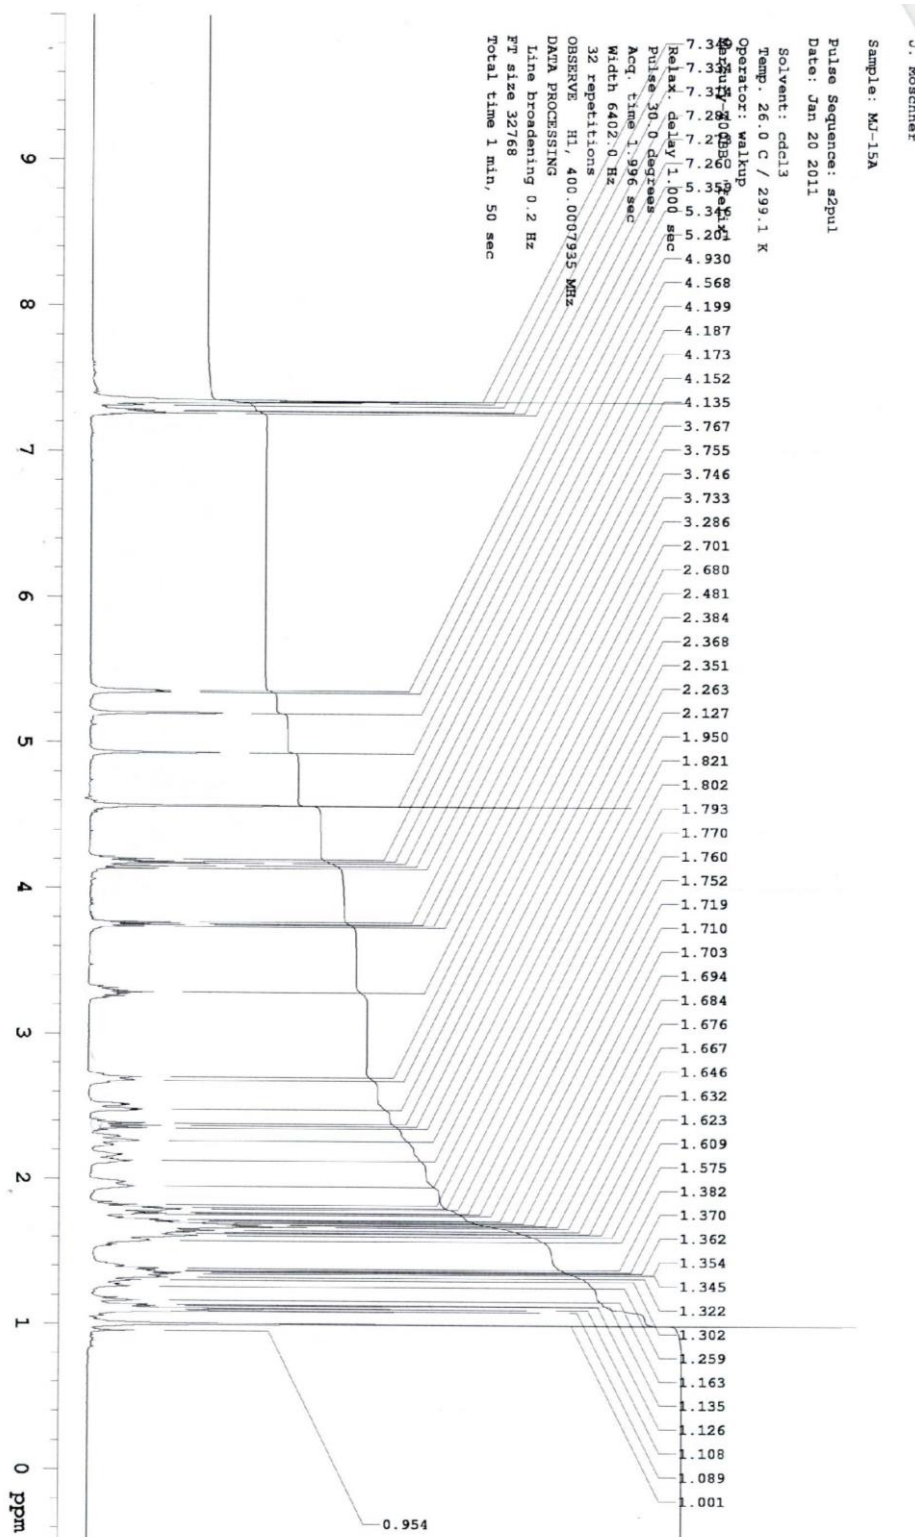

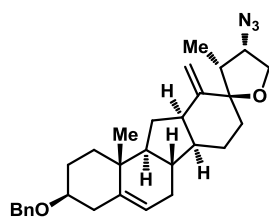

7

<sup>13</sup>C NMR (100 MHz, CDCl<sub>3</sub>)

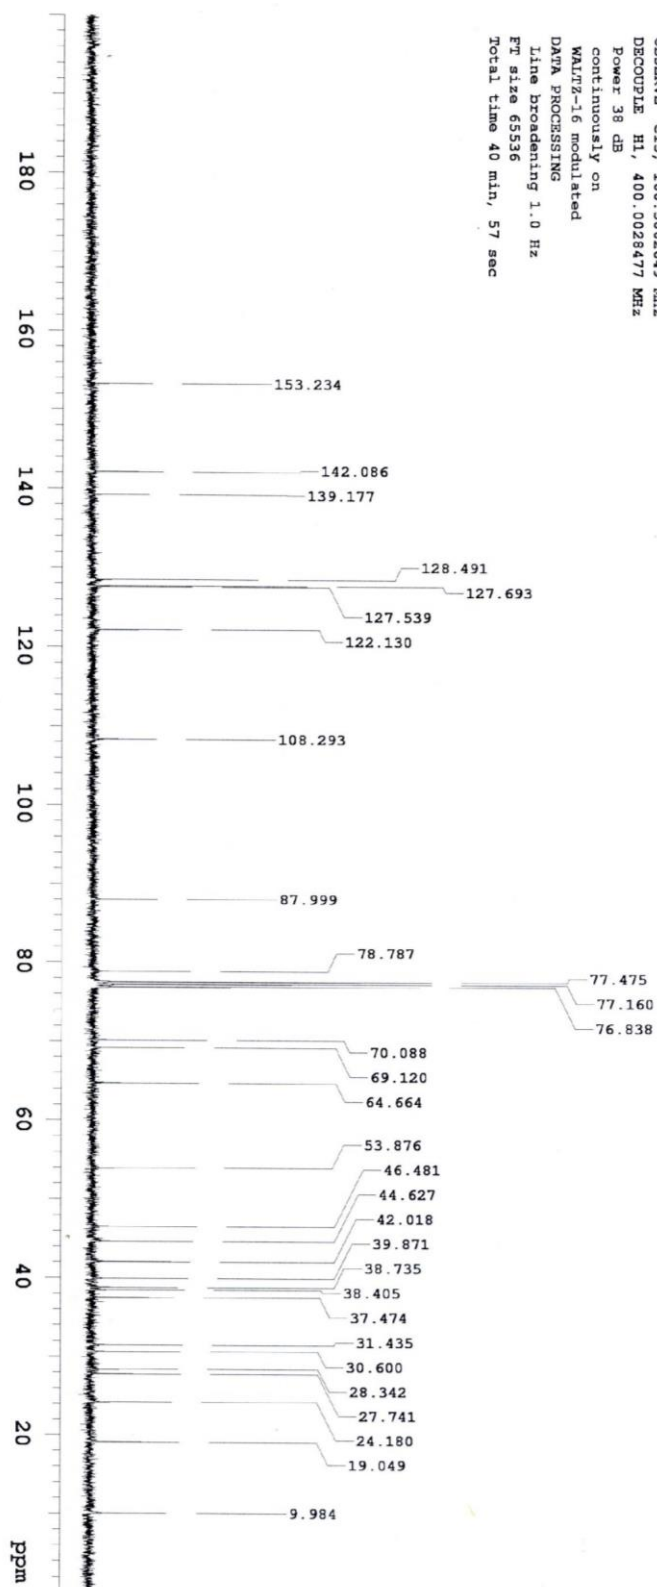

U. Moschner  
 Sample: M7-15A  
 Pulse Sequence: s2pul  
 Date: Jan 20 2011  
 Solvent: cdcl3  
 Temp: 26.0 C / 299.1 K  
 Operator: walkup  
 Mercury-400BB "Felix"  
 Relax. delay 1.000 sec  
 Pulse 45.0 degrees  
 Acq. time 1.300 sec  
 Width 24154.6 Hz  
 1000 repetitions  
 OBSERVE C13, 100.5802649 MHz  
 DECOUPLE H1, 400.0028477 MHz  
 Power 38 dB  
 continuously on  
 WALTZ-16 modulated  
 DATA PROCESSING  
 Line broadening 1.0 Hz  
 FT size 65536  
 Total time 40 min, 57 sec

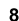

Relax. delay 1.000 sec  
Pulse 29.7 degrees  
Acq. time 1.998 sec  
Width 4800.8 Hz  
32K repetitions  
OBSERVE HI, 300.0817090 MHz  
PMT PROCESSING  
Line broadening 0.2 Hz  
FT size 32768  
Total time 2 min, 5 sec

9.967  
9.920  
9.880  
9.840  
9.800  
9.760  
9.720  
9.680  
9.640  
9.600  
9.560  
9.520  
9.480  
9.440  
9.400  
9.360  
9.320  
9.280  
9.240  
9.200  
9.160  
9.120  
9.080  
9.040  
9.000  
8.960  
8.920  
8.880  
8.840  
8.800  
8.760  
8.720  
8.680  
8.640  
8.600  
8.560  
8.520  
8.480  
8.440  
8.400  
8.360  
8.320  
8.280  
8.240  
8.200  
8.160  
8.120  
8.080  
8.040  
8.000  
7.960  
7.920  
7.880  
7.840  
7.800  
7.760  
7.720  
7.680  
7.640  
7.600  
7.560  
7.520  
7.480  
7.440  
7.400  
7.360  
7.320  
7.280  
7.240  
7.200  
7.160  
7.120  
7.080  
7.040  
7.000  
6.960  
6.920  
6.880  
6.840  
6.800  
6.760  
6.720  
6.680  
6.640  
6.600  
6.560  
6.520  
6.480  
6.440  
6.400  
6.360  
6.320  
6.280  
6.240  
6.200  
6.160  
6.120  
6.080  
6.040  
6.000  
5.960  
5.920  
5.880  
5.840  
5.800  
5.760  
5.720  
5.680  
5.640  
5.600  
5.560  
5.520  
5.480  
5.440  
5.400  
5.360  
5.320  
5.280  
5.240  
5.200  
5.160  
5.120  
5.080  
5.040  
5.000  
4.960  
4.920  
4.880  
4.840  
4.800  
4.760  
4.720  
4.680  
4.640  
4.600  
4.560  
4.520  
4.480  
4.440  
4.400  
4.360  
4.320  
4.280  
4.240  
4.200  
4.160  
4.120  
4.080  
4.040  
4.000  
3.960  
3.920  
3.880  
3.840  
3.800  
3.760  
3.720  
3.680  
3.640  
3.600  
3.560  
3.520  
3.480  
3.440  
3.400  
3.360  
3.320  
3.280  
3.240  
3.200  
3.160  
3.120  
3.080  
3.040  
3.000  
2.960  
2.920  
2.880  
2.840  
2.800  
2.760  
2.720  
2.680  
2.640  
2.600  
2.560  
2.520  
2.480  
2.440  
2.400  
2.360  
2.320  
2.280  
2.240  
2.200  
2.160  
2.120  
2.080  
2.040  
2.000  
1.960  
1.920  
1.880  
1.840  
1.800  
1.760  
1.720  
1.680  
1.640  
1.600  
1.560  
1.520  
1.480  
1.440  
1.400  
1.360  
1.320  
1.280  
1.240  
1.200  
1.160  
1.120  
1.080  
1.040  
1.000  
0.960  
0.920



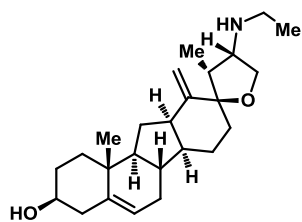

8

APT (75 MHz, CDCl<sub>3</sub>)

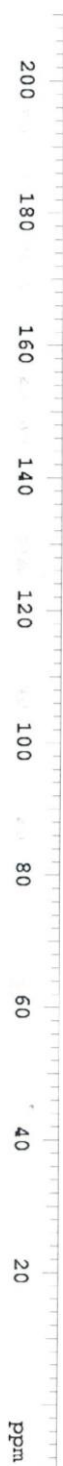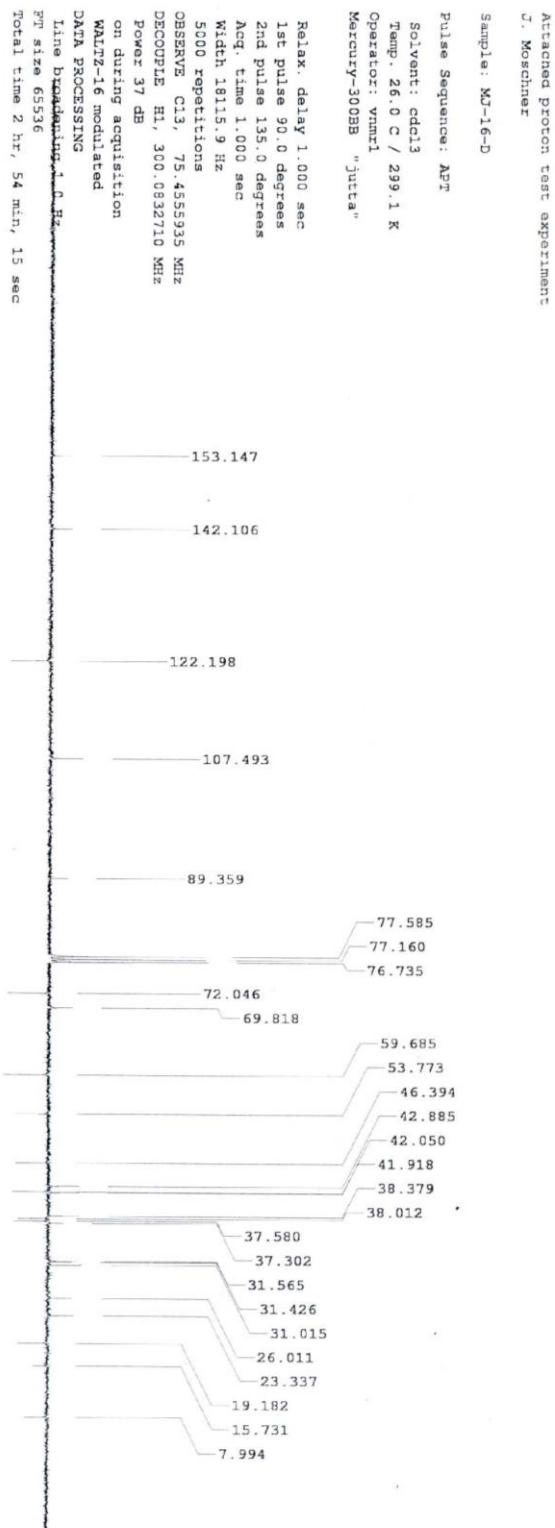

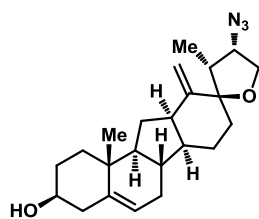

27

<sup>1</sup>H NMR (400 MHz, CDCl<sub>3</sub>)

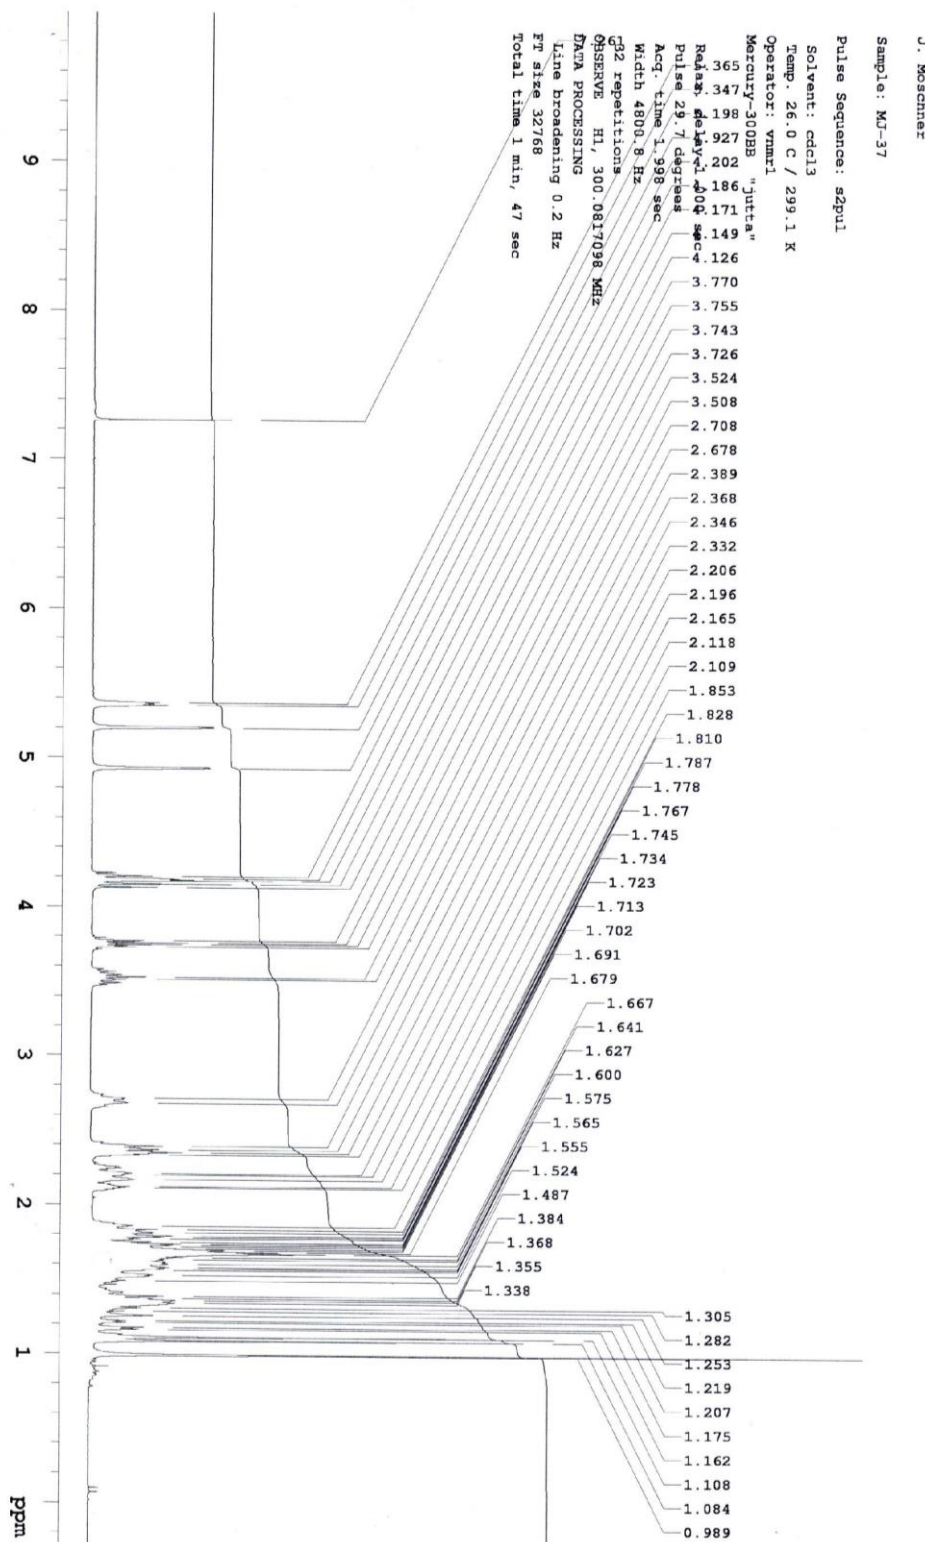

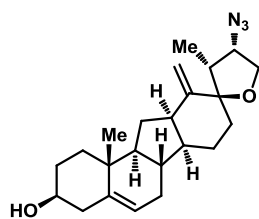

27

$^{13}\text{C}$  NMR (75 MHz,  $\text{CDCl}_3$ )

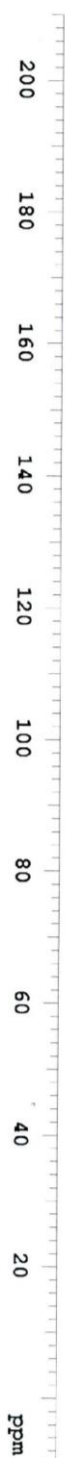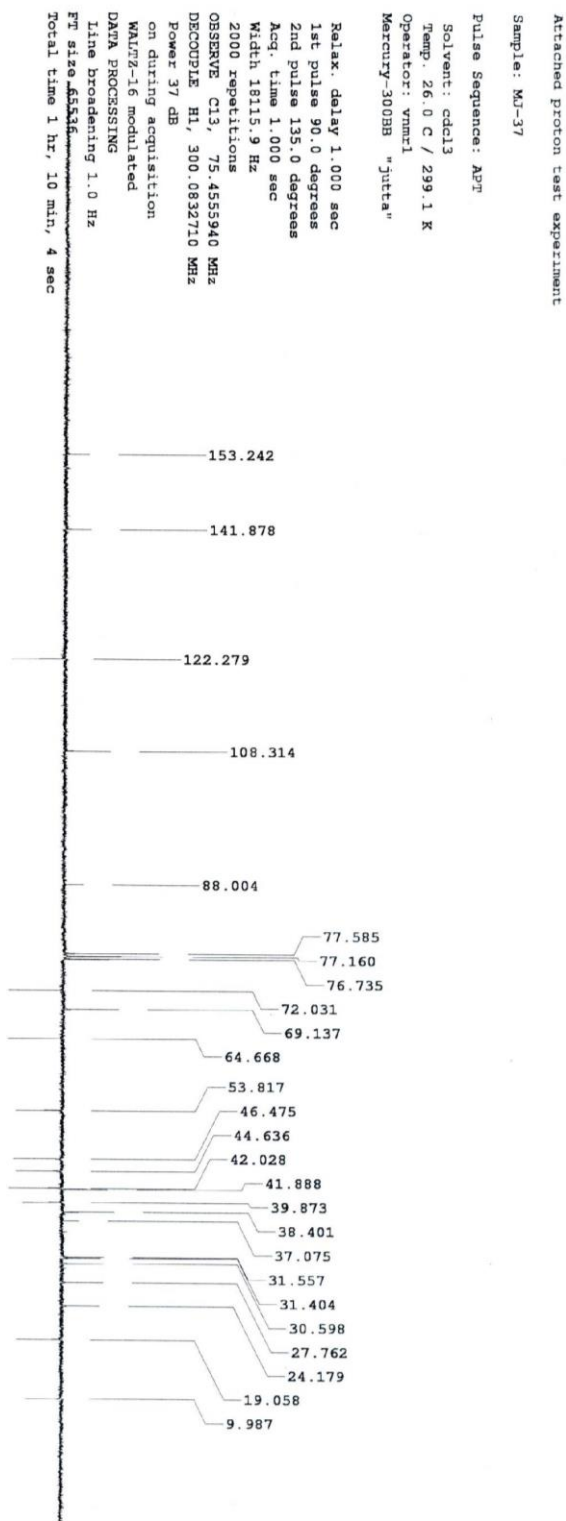

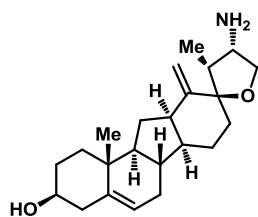

9

<sup>1</sup>H NMR (300 MHz, CD<sub>3</sub>OD)

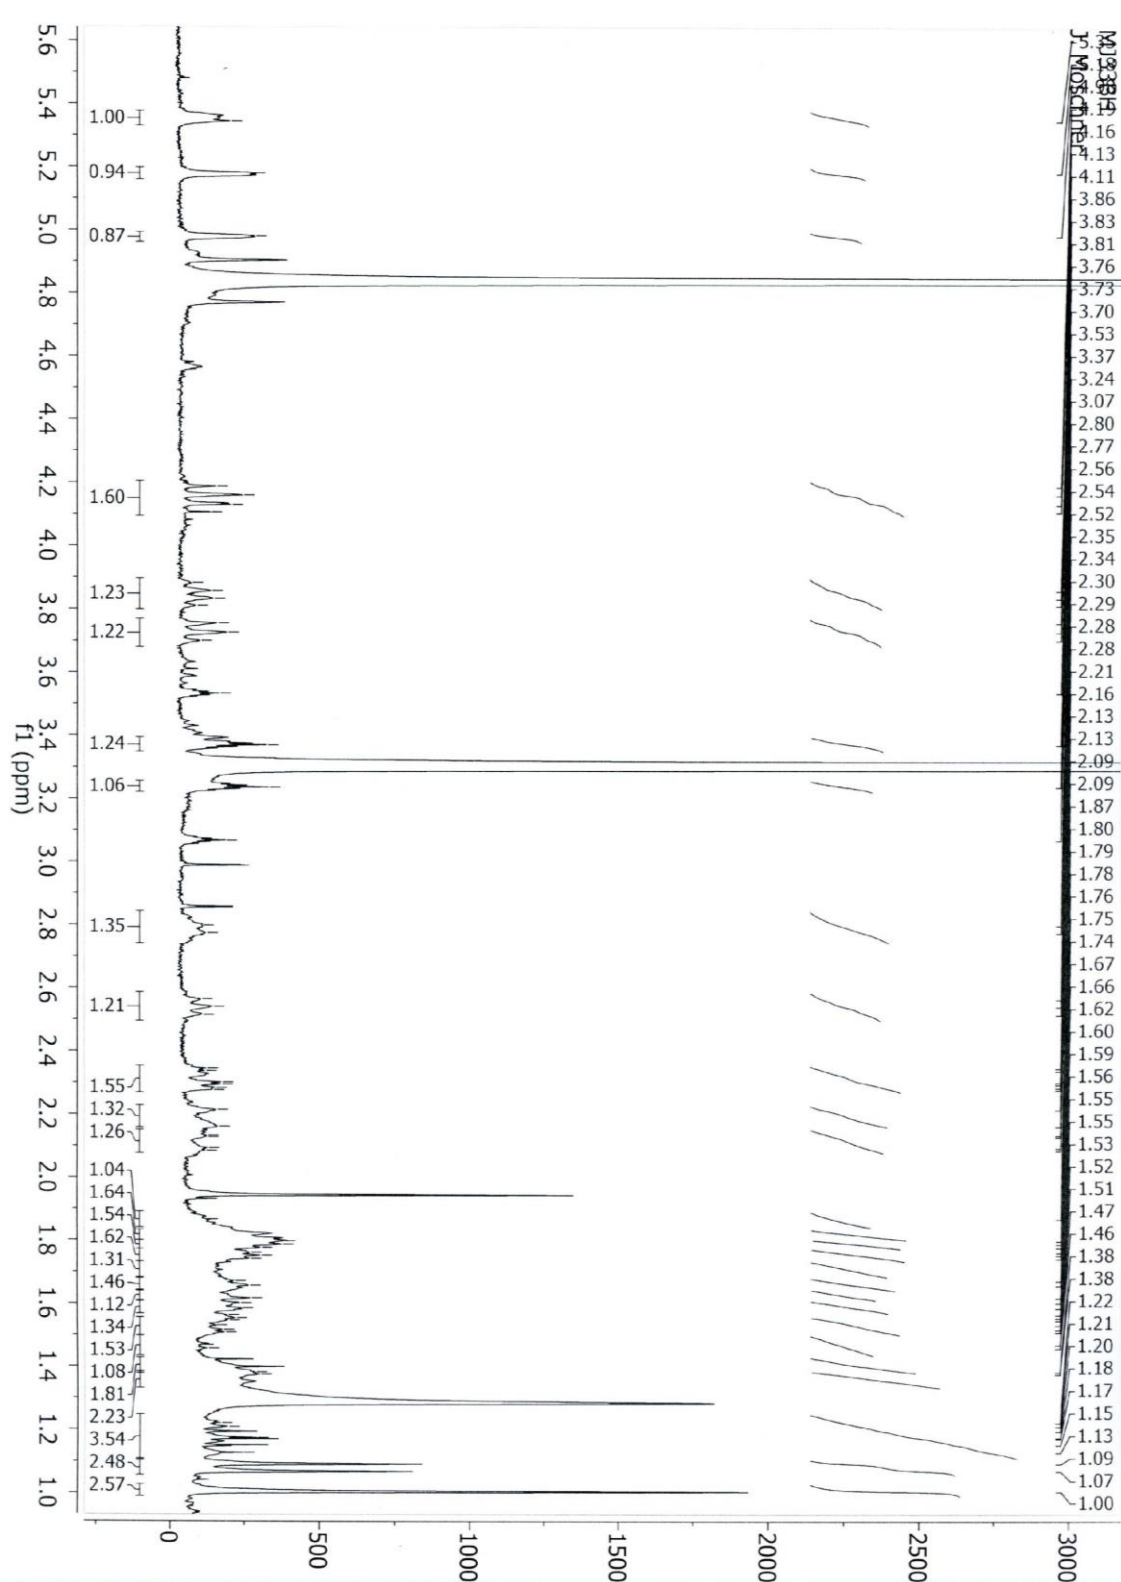

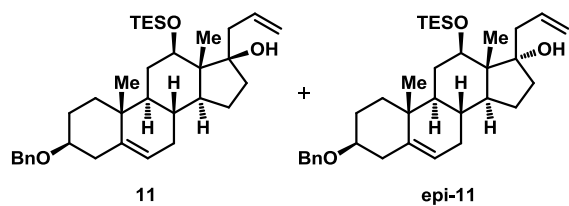

$^1\text{H}$  NMR (400 MHz,  $\text{CDCl}_3$ )

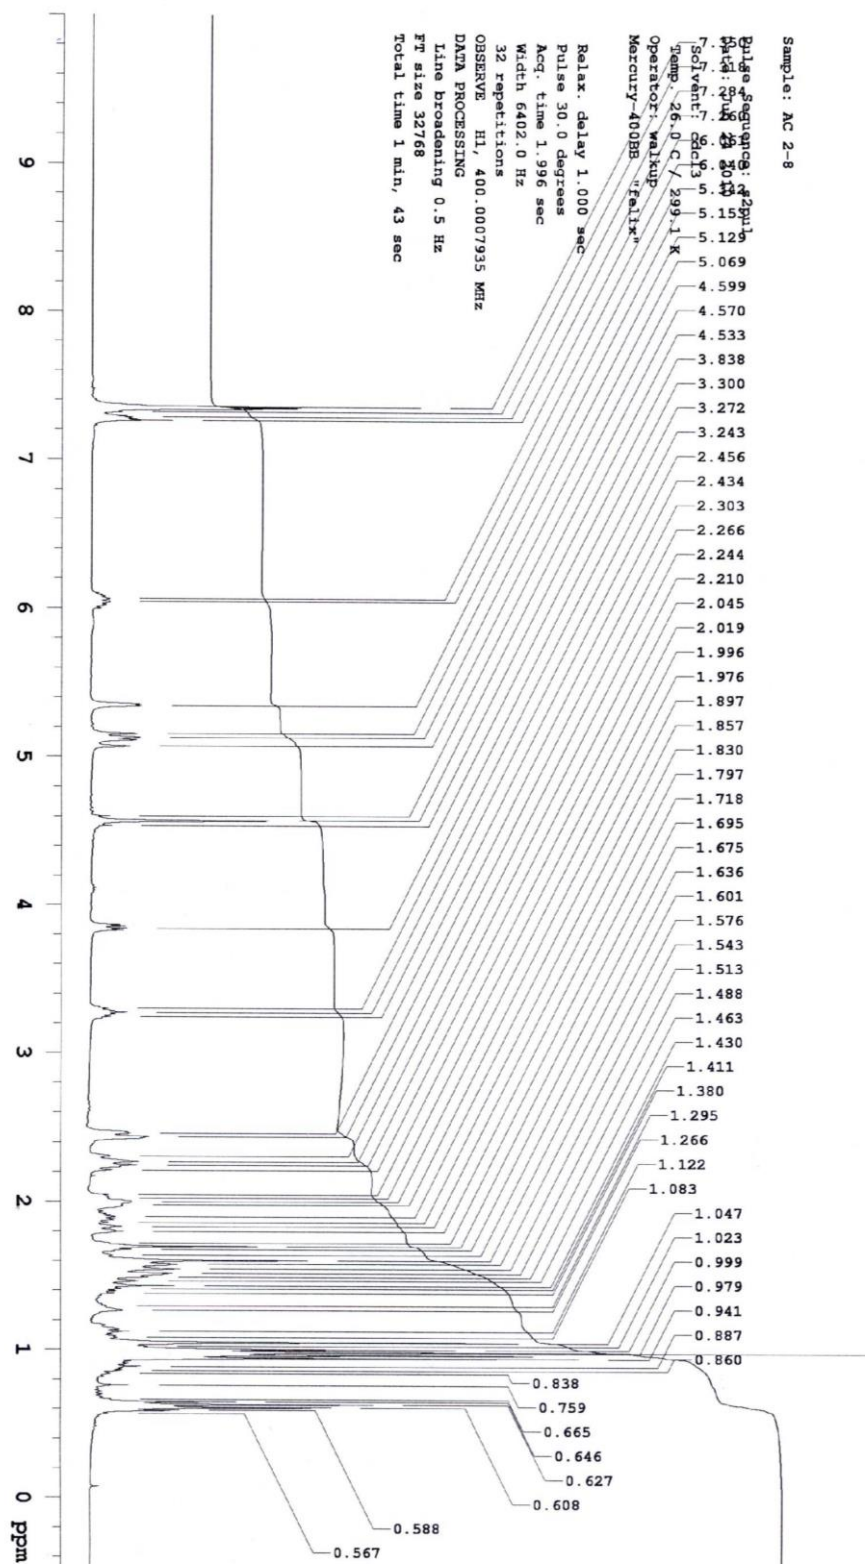

A. Chentsova

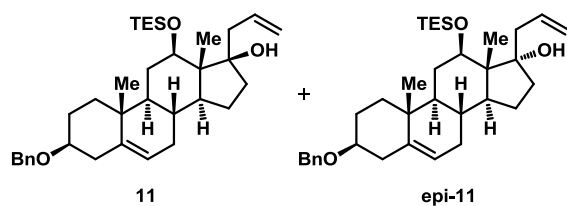

$^{13}\text{C}$  NMR (100 MHz,  $\text{CDCl}_3$ )

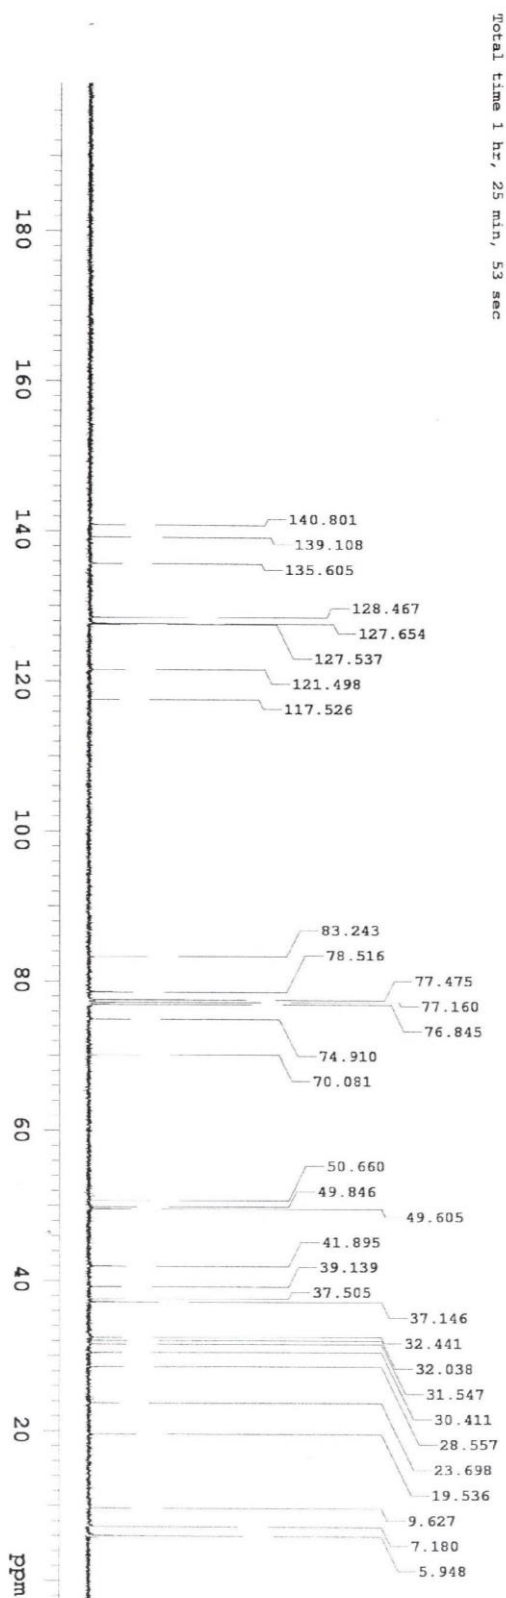

Rovardi

Sample: IR-19

Pulse Sequence: s2pul  
 Date: Jan 28 2010

Solvent: cdcl3  
 Temp: 26.0 C / 299.1 K  
 Operator: walkup  
 Mercury-400BB "felix"



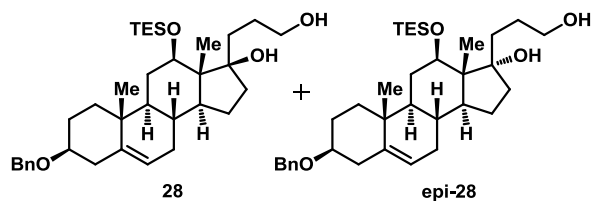

$^1\text{H}$  NMR (300 MHz,  $\text{CDCl}_3$ )

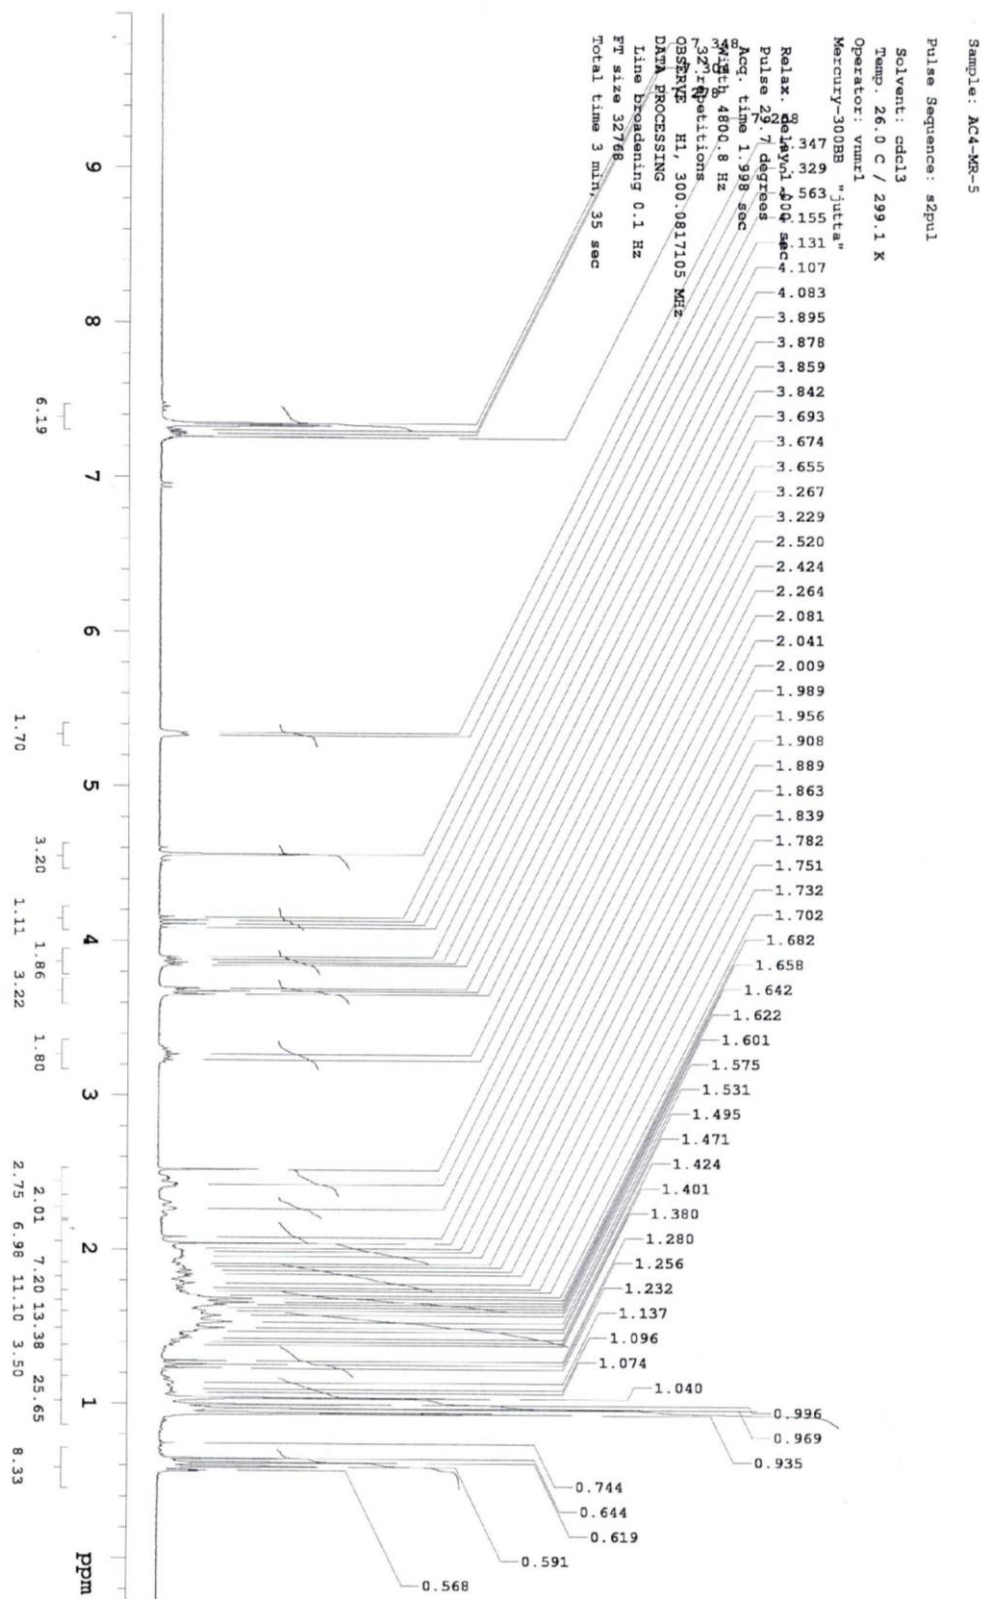



$^{13}\text{C}$  NMR (75 MHz,  $\text{CDCl}_3$ )

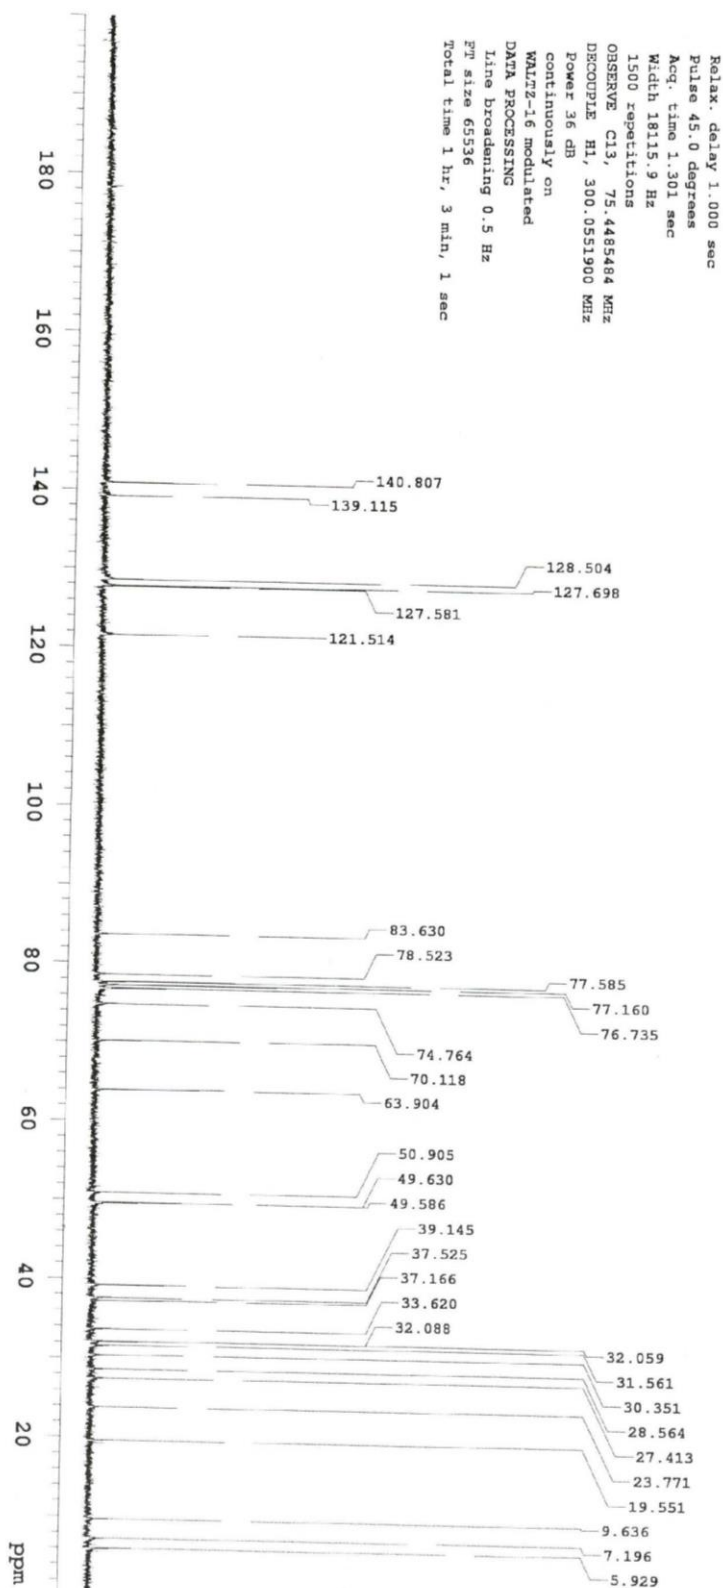

Sample: IR-58a  
Pulse Sequence: szpul  
Date: May 4 2010  
Solvent: cdcl3  
Temp: 26.0 C / 299.1 K  
Operator: walkup  
Mercury-300BB "jutta"

Relax. delay 1.000 sec  
Pulse 45.0 degrees  
Acq. time 1.301 sec  
Width 1815.9 Hz  
1500 repetitions  
OBSERVE C13, 75.4485484 MHz  
DECOUPLE H1, 300.0551900 MHz  
Power 36 dB  
continuously on  
WALTZ-16 modulated  
DATA PROCESSING  
Line broadening 0.5 Hz  
F2 size 65536  
Total time 1 hr, 3 min, 1 sec

J. Kovarova



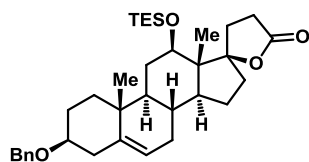

12

$^1\text{H}$  NMR (400 MHz,  $\text{CDCl}_3$ )

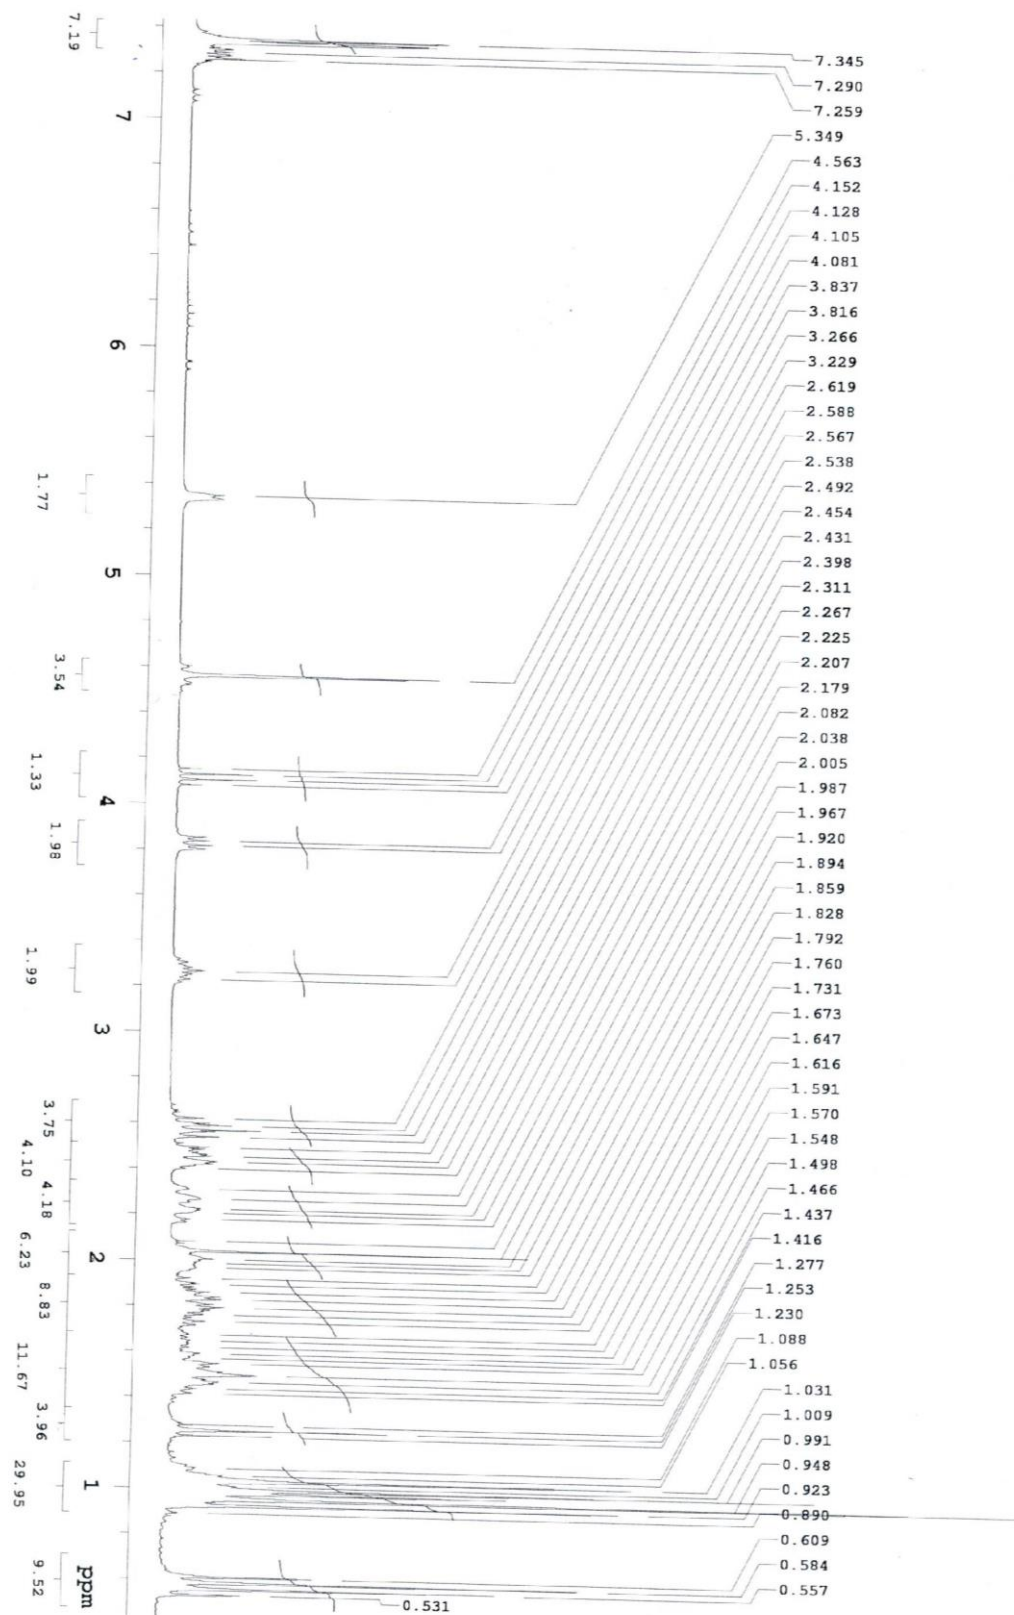



12

$^{13}\text{C}$  NMR (100 MHz,  $\text{CDCl}_3$ )

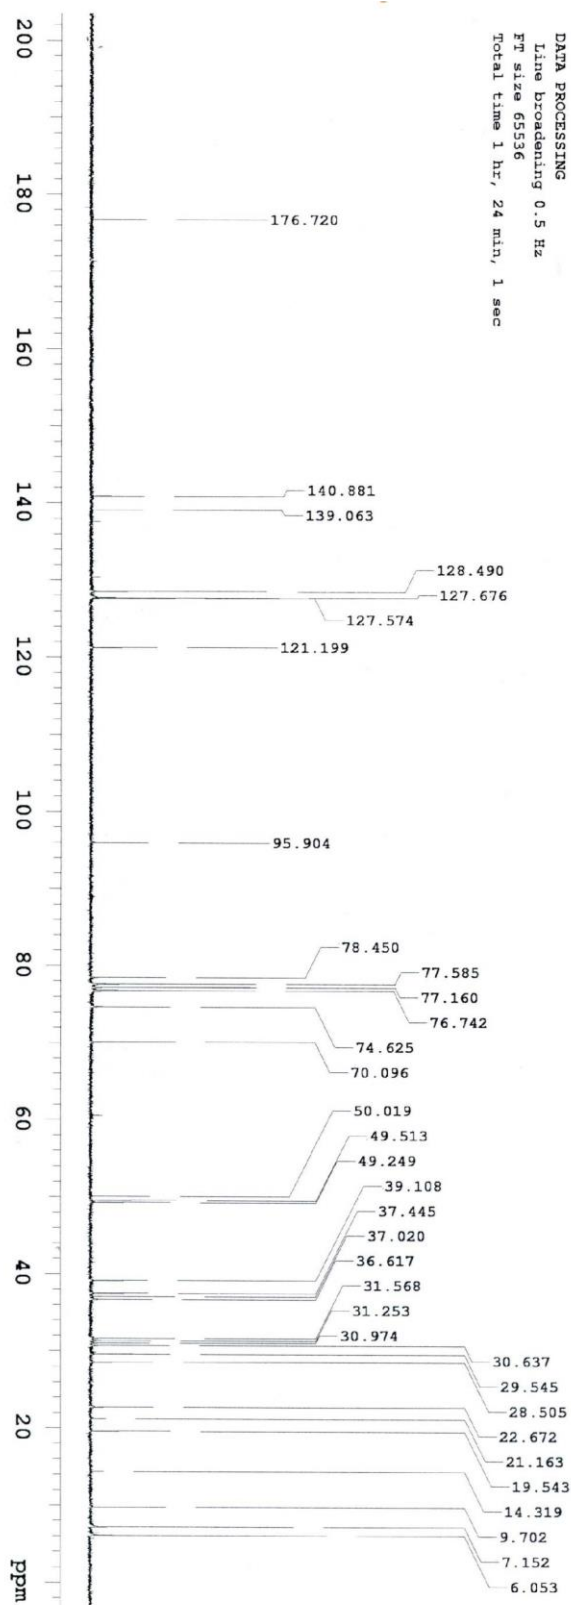

Cheniseva  
Sample: AC2-9-2  
Pulse Sequence: szpul  
Date: Aug 3 2010  
Solvent:  $\text{cdCl}_3$   
Temp: 26.0 C / 299.1 K  
Operator: valkup  
Mercury-300BB "julia"  
Relax. delay 1.000 sec  
Pulse 45.0 degrees  
Acq. time 1.301 sec  
Width 1815.9 Hz  
1152 repetitions  
OBSERVE  $\text{Cl}_3$ , 75.4485495 MHz  
DECOUPLE  $\text{H}_1$ , 300.0551900 MHz  
Power 42 dB  
continuously on  
WALTZ-16 modulated  
DATA PROCESSING  
Line broadening 0.5 Hz  
FT size 65536  
Total time 1 hr, 24 min, 1 sec

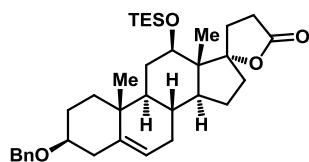

epi-12

$^1\text{H}$  NMR (400 MHz,  $\text{CDCl}_3$ )

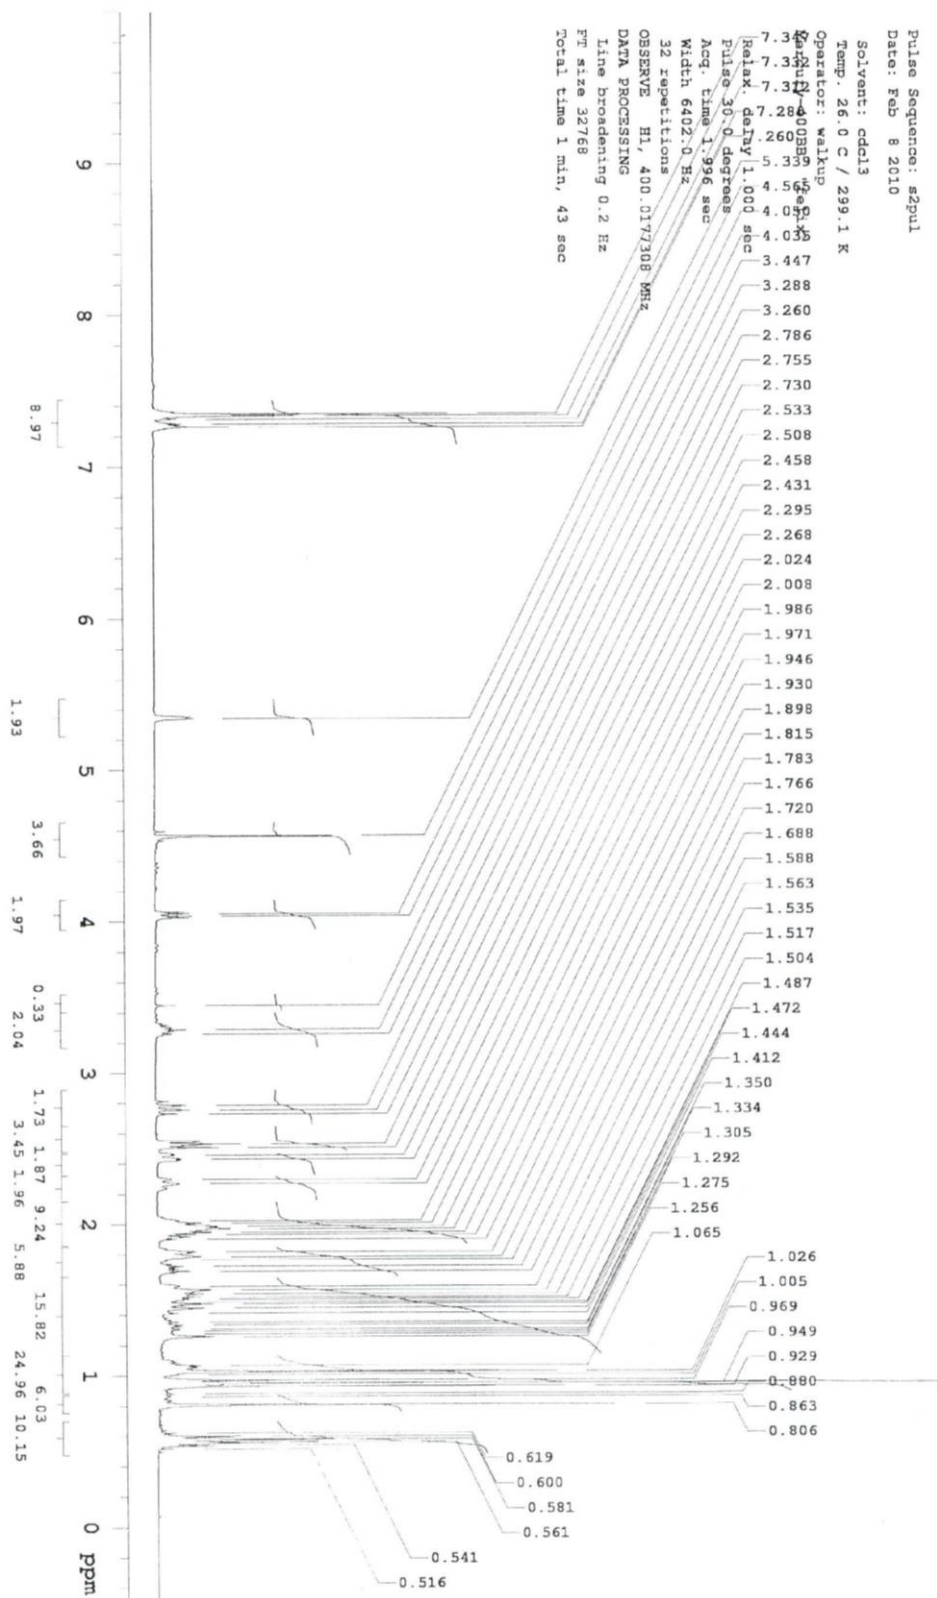

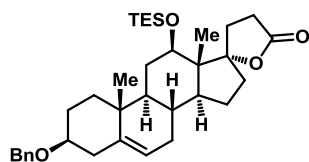

epi-12

$^{13}\text{C}$  NMR (100 MHz,  $\text{CDCl}_3$ )

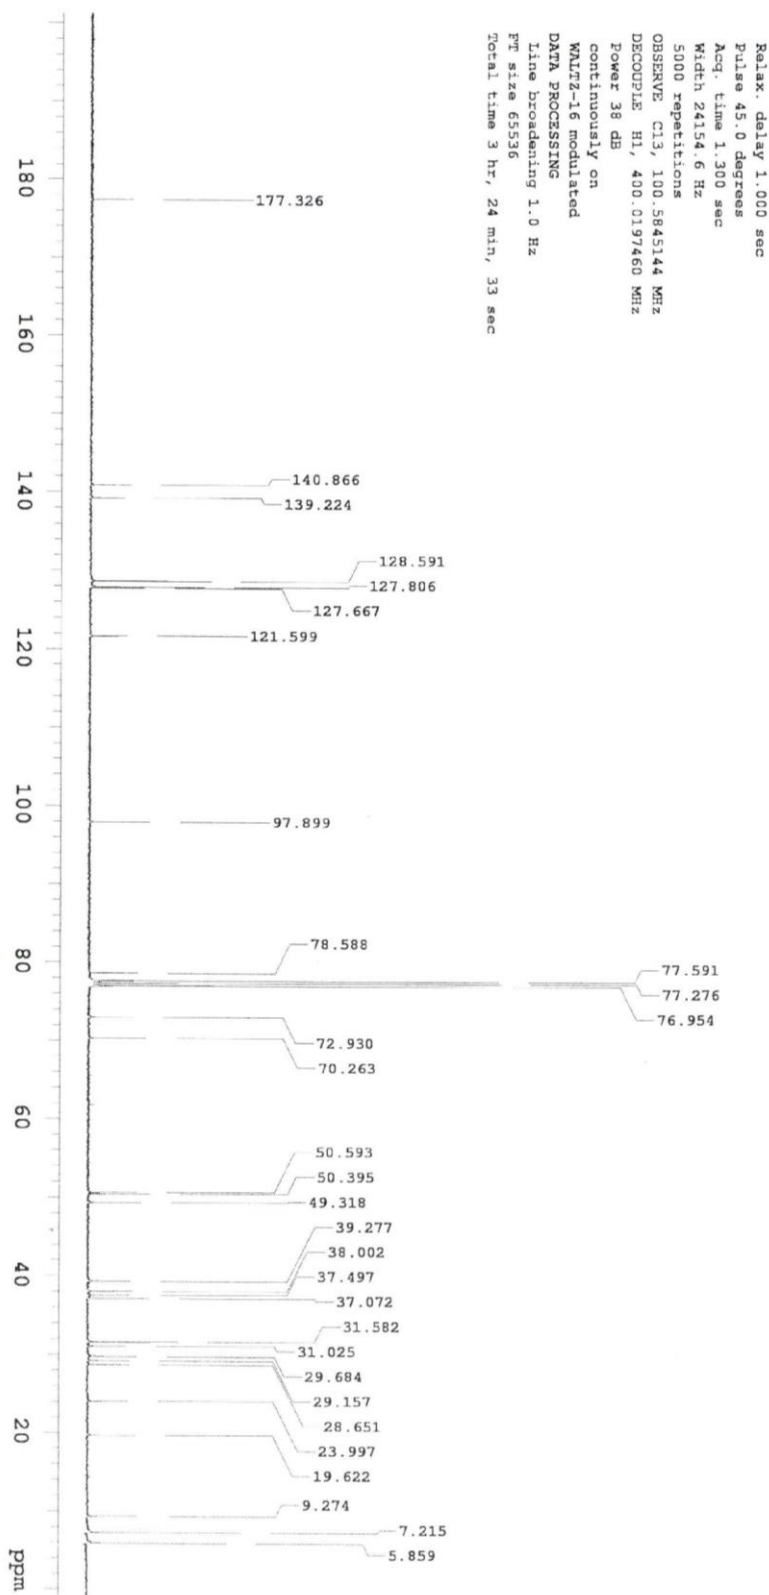

I. NOVAKI  
 Sample: IR-20  
 Pulse Sequence: szpul  
 Date: Feb 8 2010  
 Solvent:  $\text{cdcl}_3$   
 Temp: 26.0 C / 299.1 K  
 Operator: walkup  
 Mercury-400BB "felix"  
 Relax: delay 1.000 sec  
 Pulse 45.0 degrees  
 Acq. time 1.300 sec  
 Width 24154.6 Hz  
 5000 repetitions  
 OBSERVE  $\text{C13}$ , 100.584514 MHz  
 DECODE  $\text{H1}$ , 400.0197460 MHz  
 Power 38 dB  
 continuously on  
 WALTZ-16 modulated  
 DATA PROCESSING  
 Line broadening 1.0 Hz  
 FT size 65536  
 Total time 3 hr, 24 min, 33 sec

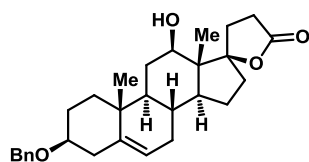

29

$^1\text{H}$  NMR (400 MHz,  $\text{CDCl}_3$ )

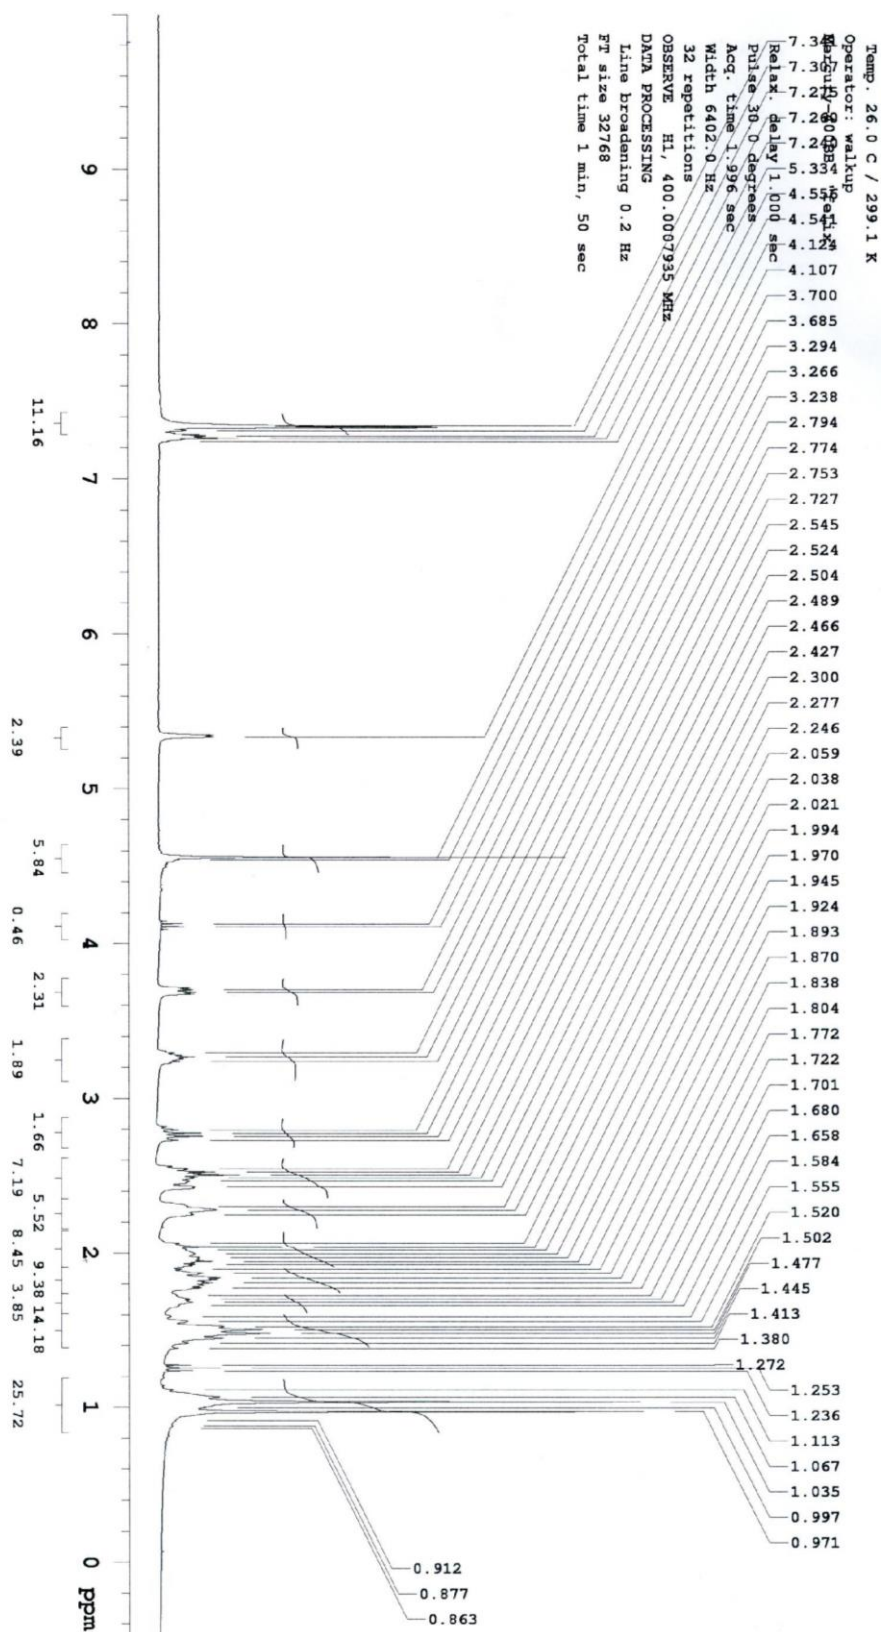

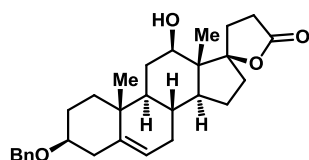

29

$^{13}\text{C}$  NMR (100 MHz,  $\text{CDCl}_3$ )

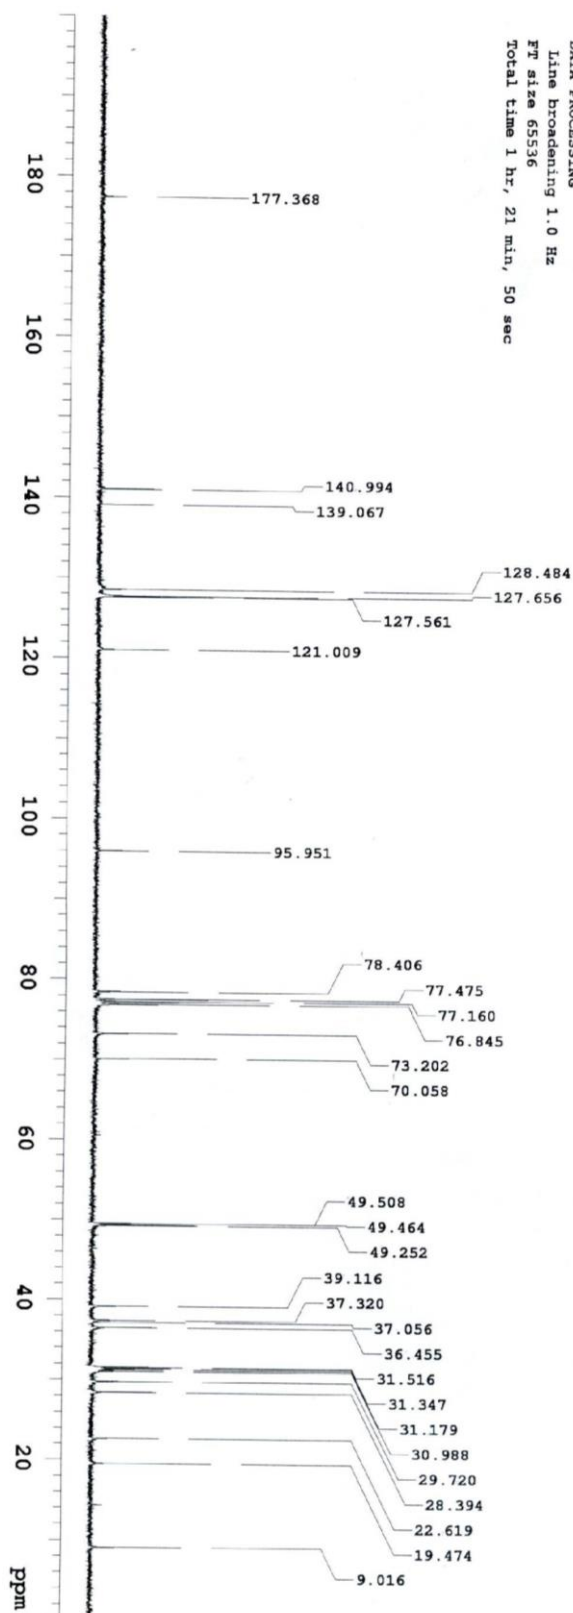

A. Chentsova  
 Sample: AC2-9/1  
 Pulse Sequence: szpul  
 Date: Sep 9 2010  
 Solvent: cdcl3  
 Temp: 26.0 C / 299.1 K  
 Operator: walkup  
 Mercury-400B "felix"  
 Relax. delay 1.000 sec  
 Pulse 40.5 degrees  
 Acq. time 1.300 sec  
 Width 24154.6 Hz  
 608 repetitions  
 OBSERVE C13, 100.5802671 MHz  
 DECOUPLE H1, 400.0028477 MHz  
 Power 38 dB  
 continuously on  
 WALTZ-16 modulated  
 DATA PROCESSING  
 Line broadening 1.0 Hz  
 FT size 65536  
 Total time 1 hr, 21 min, 50 sec



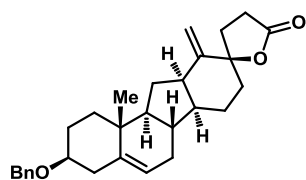

13

$^1\text{H}$  NMR (300 MHz,  $\text{CDCl}_3$ )

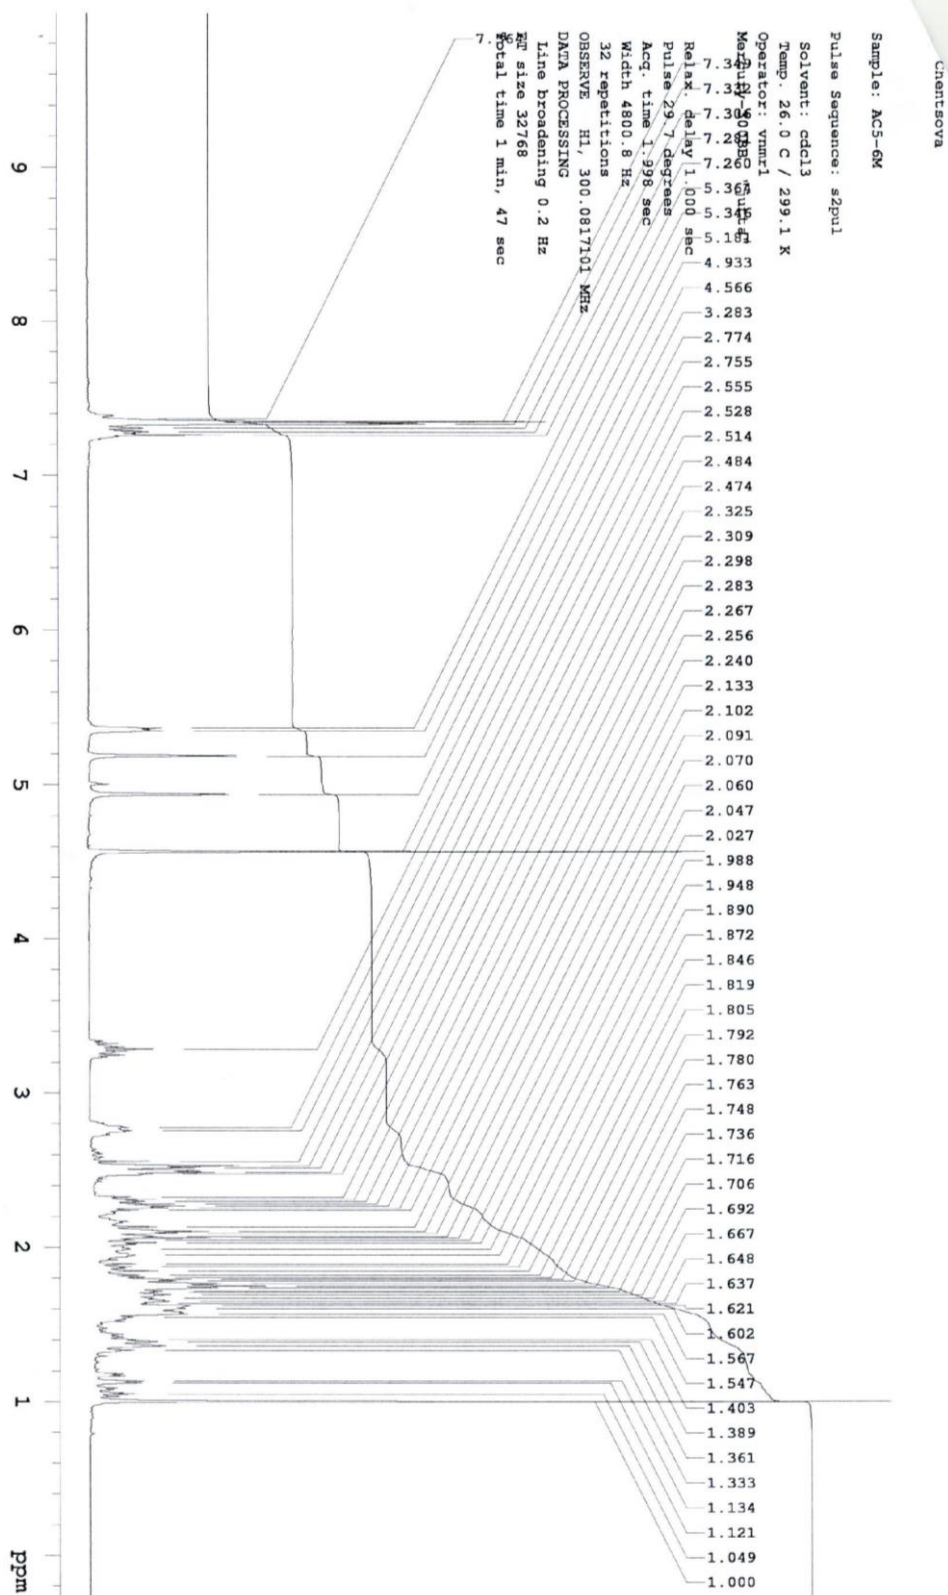

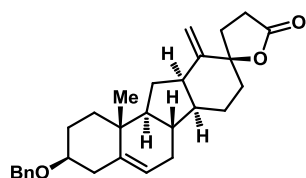

13

APT (75 MHz, CDCl<sub>3</sub>)

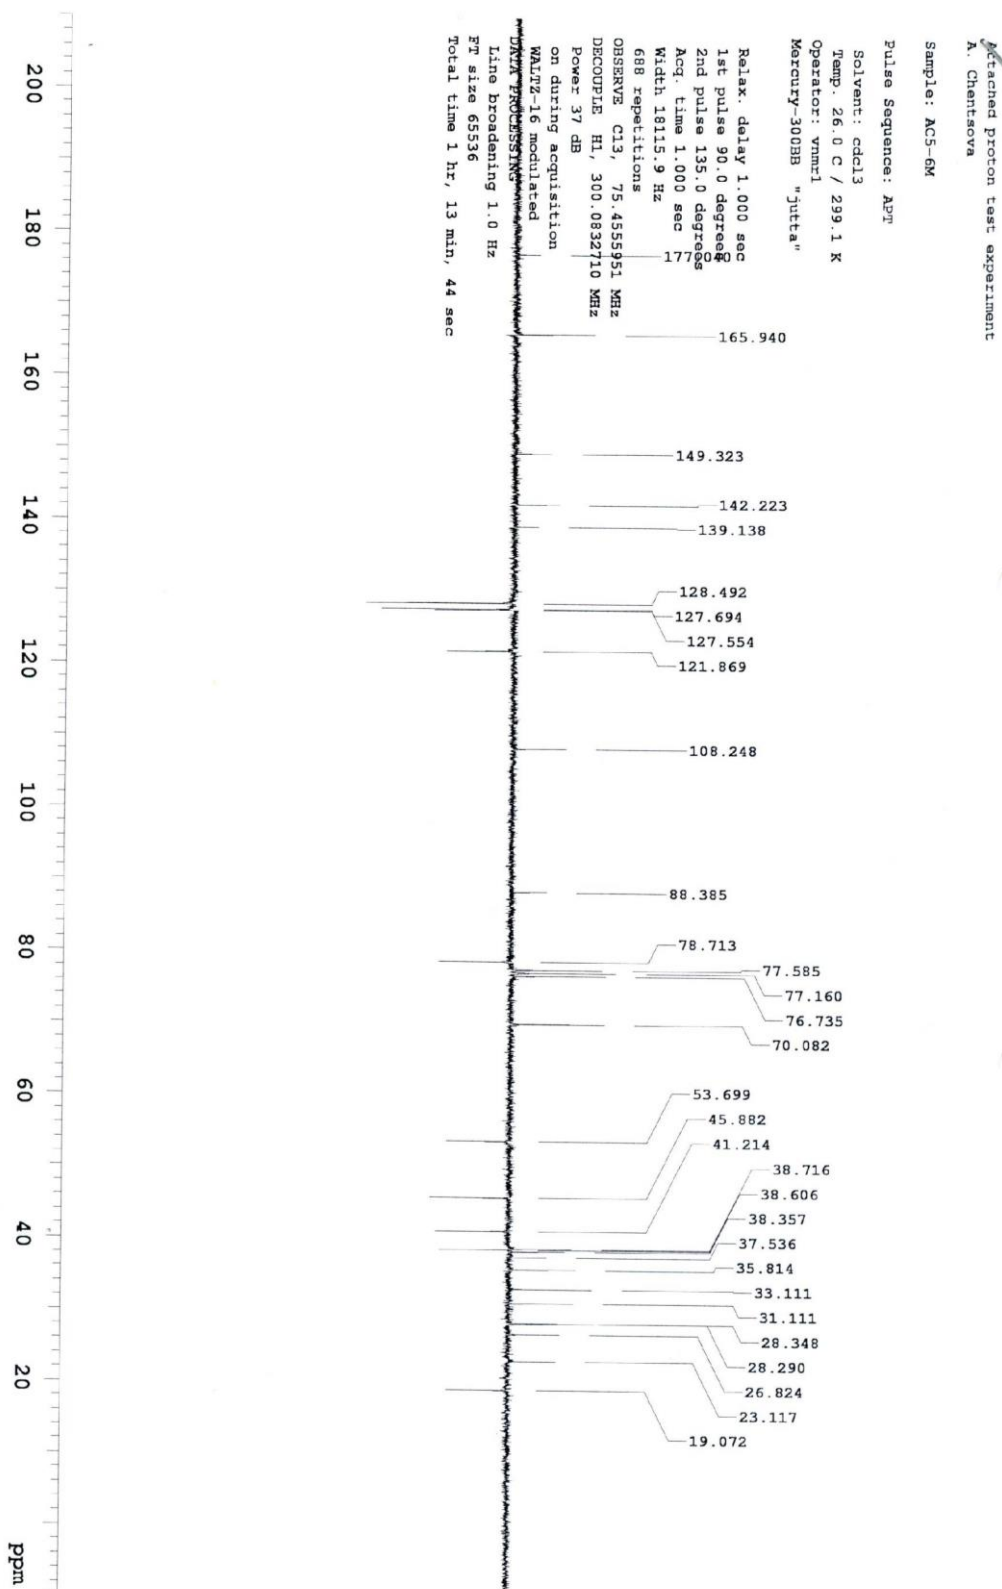



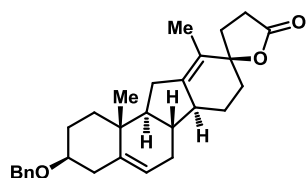

30

$^1\text{H}$  NMR (300 MHz,  $\text{CDCl}_3$ )

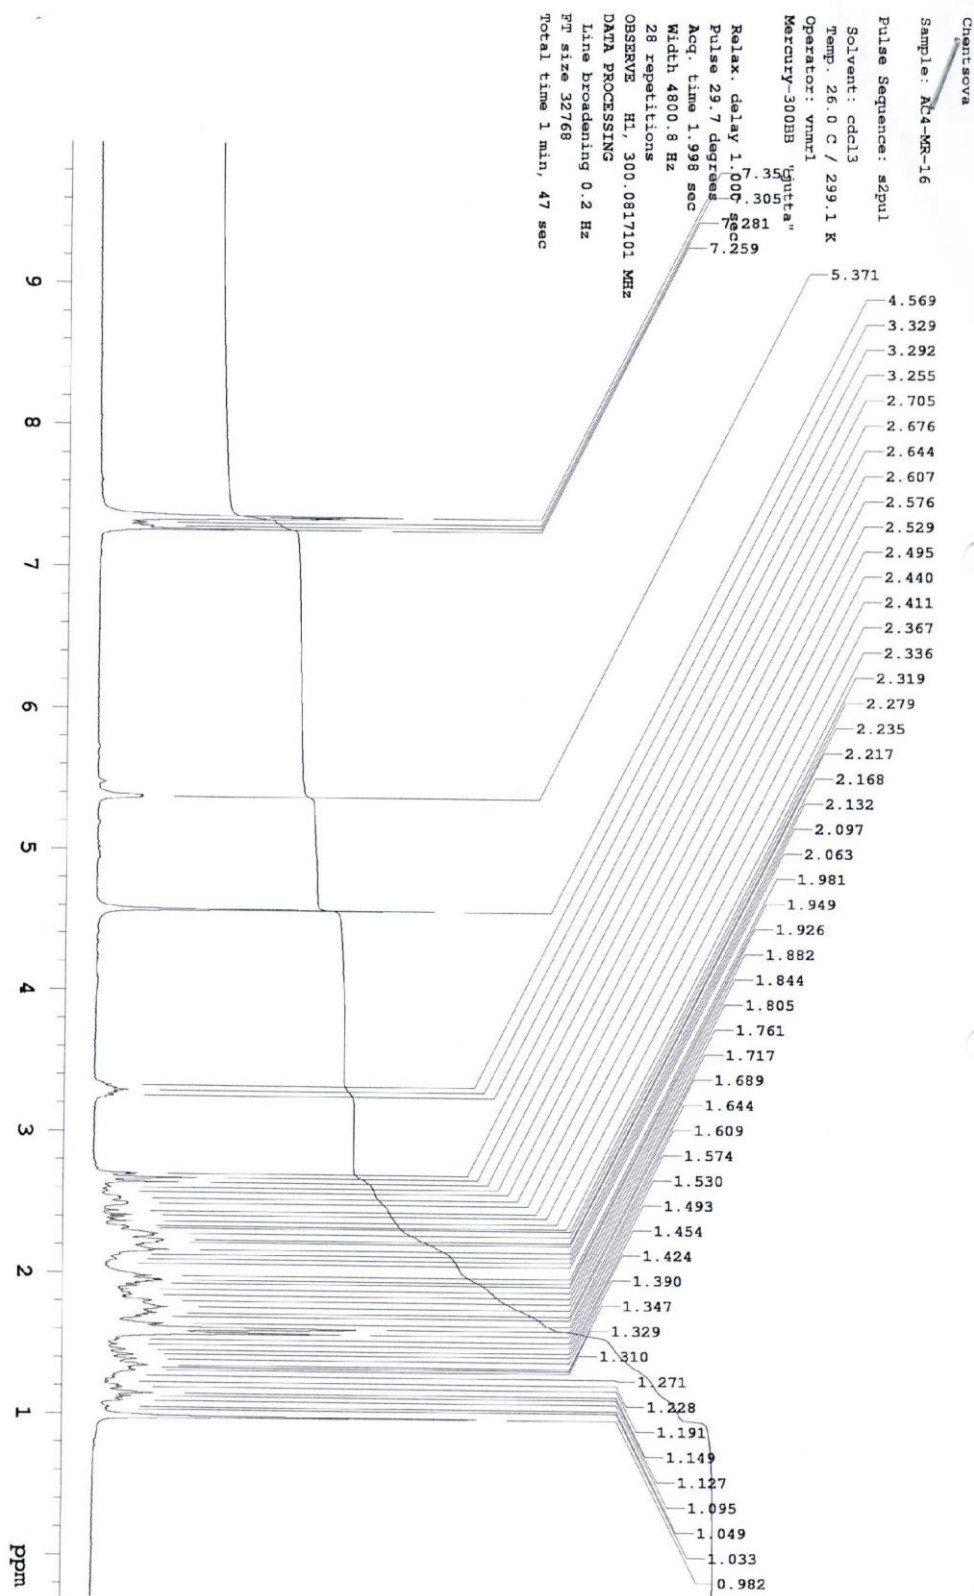

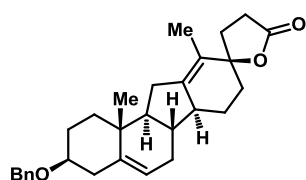

30

$^{13}\text{C}$  NMR (75 MHz,  $\text{CDCl}_3$ )

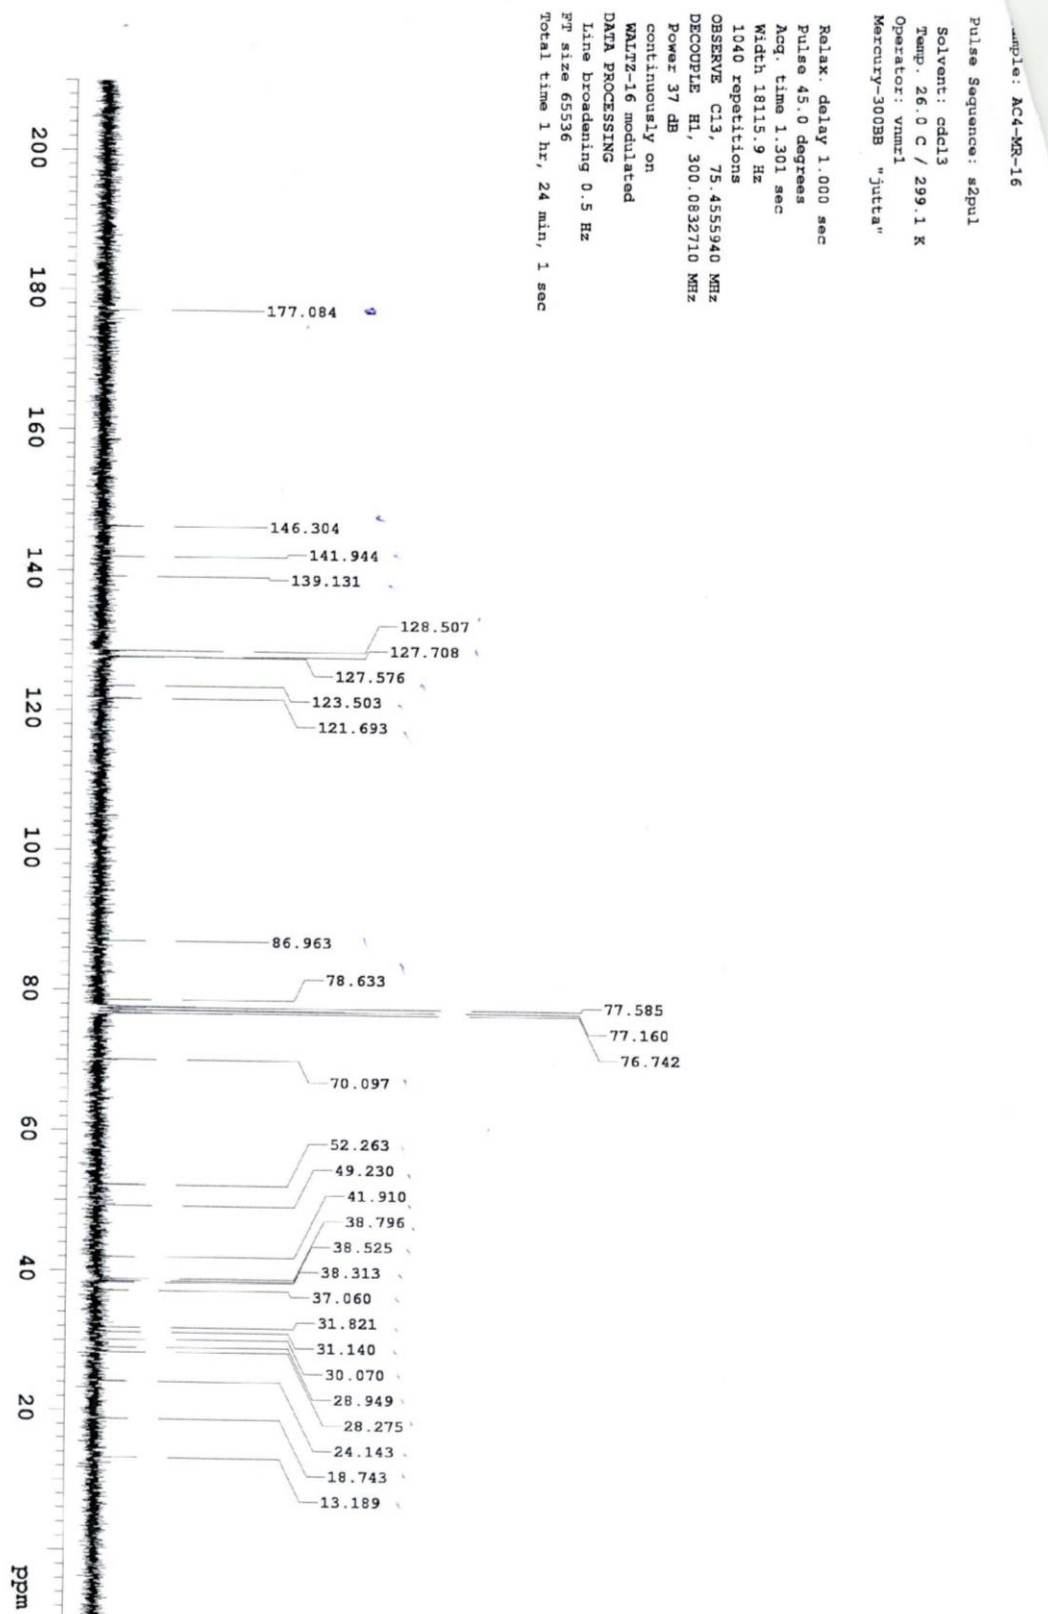

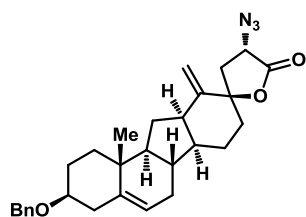

14

$^1\text{H}$  NMR (400 MHz,  $\text{CDCl}_3$ )

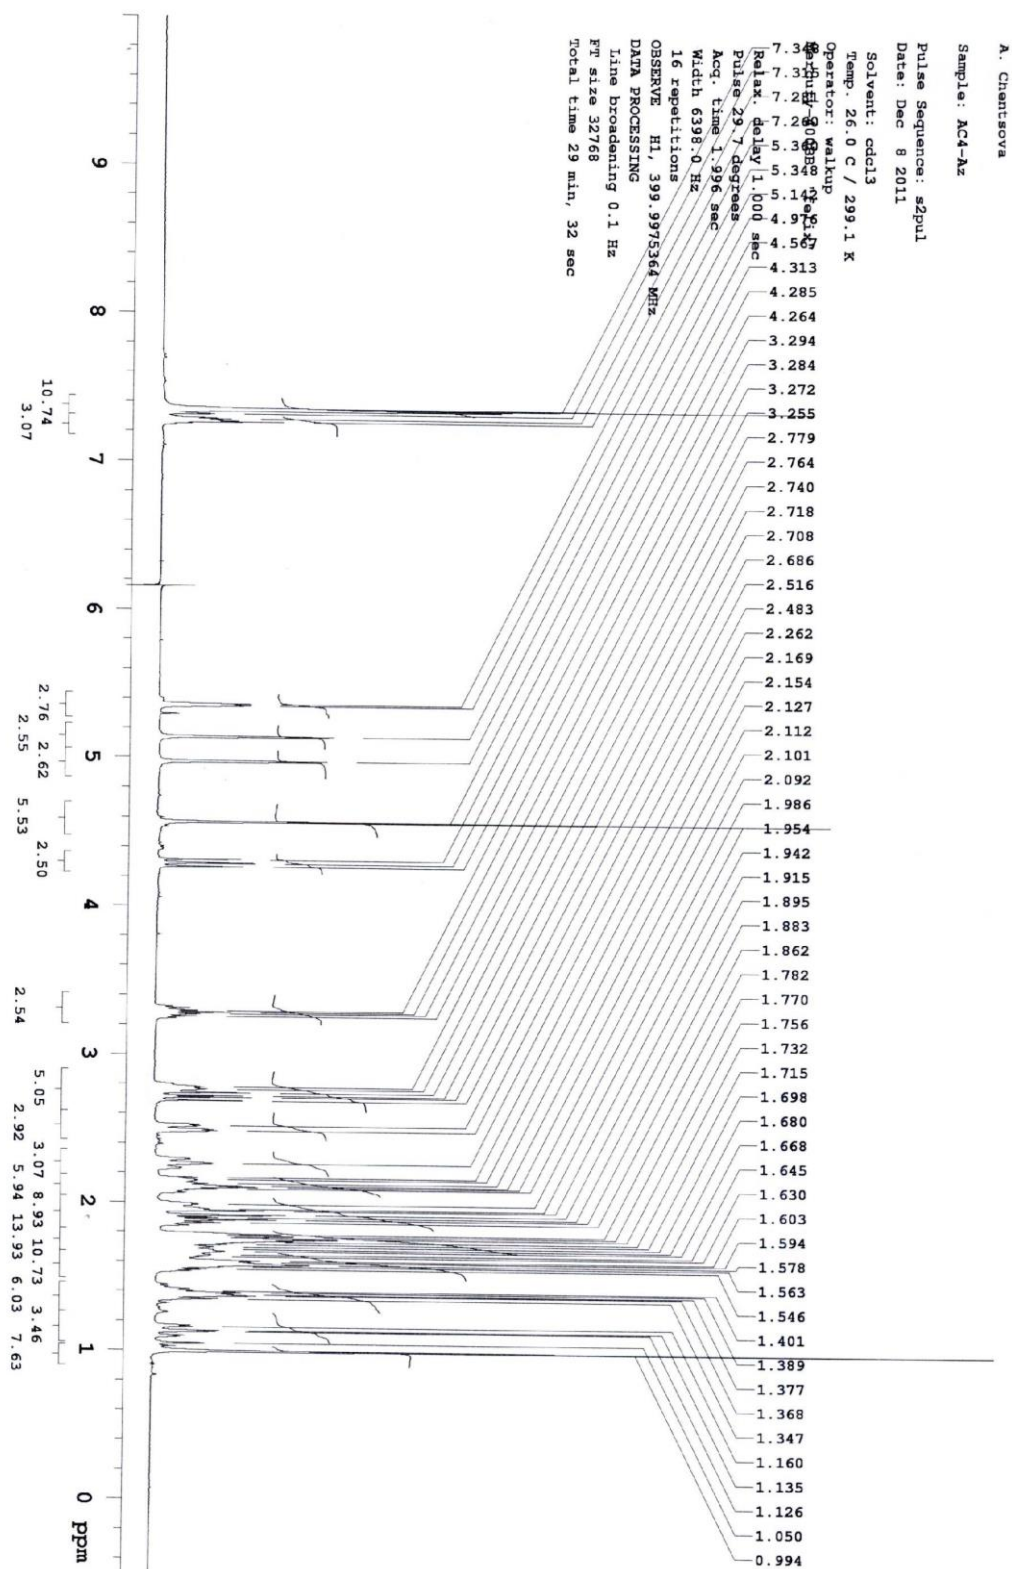

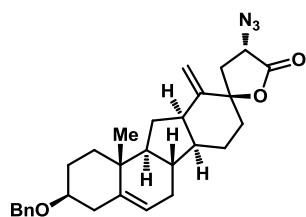

14

<sup>13</sup>C NMR (100 MHz, CDCl<sub>3</sub>)

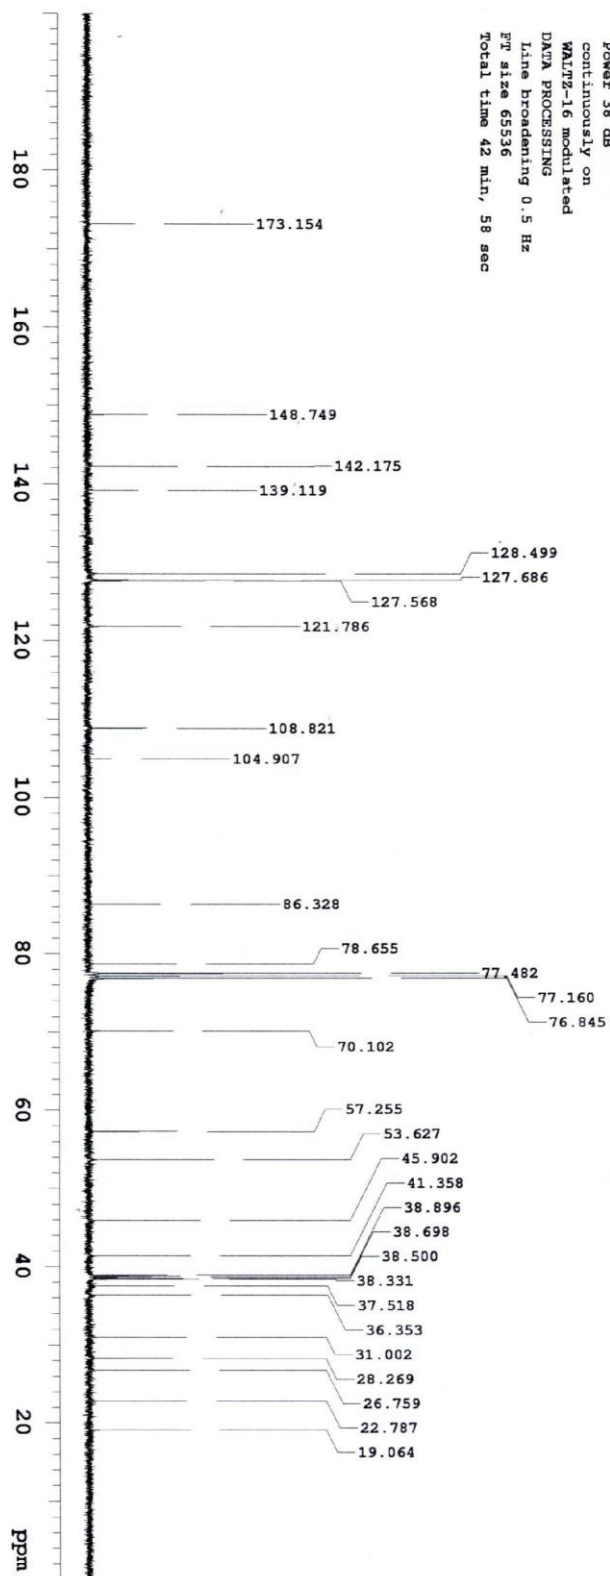

A. Chentsova  
 Sample: AC4-Az  
 Pulse Sequence: szpul  
 Date: Dec 8 2011  
 Solvent: cdcl3  
 Temp: 26.0 C / 299.1 K  
 Operator: walkup  
 Mercury-400B "felix"  
 Relax. delay 1.000 sec  
 Pulse 45.0 degrees  
 Acq. time 1.300 sec  
 Width 24154.6 Hz  
 736 repetitions  
 OBSERVE C13, 100.5794458 MHz  
 DECOUPLE H1, 399.9994929 MHz  
 Power 38 dB  
 continuously on  
 WALTZ-16 modulated  
 DATA PROCESSING  
 Line broadening 0.5 Hz  
 FT size 65536  
 Total time 42 min, 58 sec

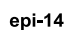

Sample: AC 4-baz  
Pulse Sequence: a2pml  
Date: Jan 23 2012  
Solvent: cdcl3  
Temp: 20.0 C / 293.1 K  
Operator: walklin  
Mercury-400SB  
Relax. delay 1.000 sec  
Pulse 29.7 degrees  
Acq. time 1.996 sec  
Width 6398.0 Hz  
32 repetitions  
OBSERVE H1, 399.9975363 MHz  
DATA PROCESSING  
Line broadening 0.2 Hz  
FT size 32768  
Total time 1 min, 50 sec

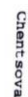

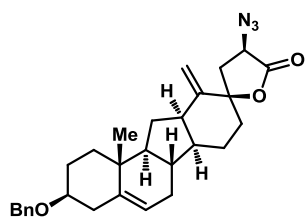

epi-14

$^{13}\text{C}$  NMR (100 MHz,  $\text{CDCl}_3$ )

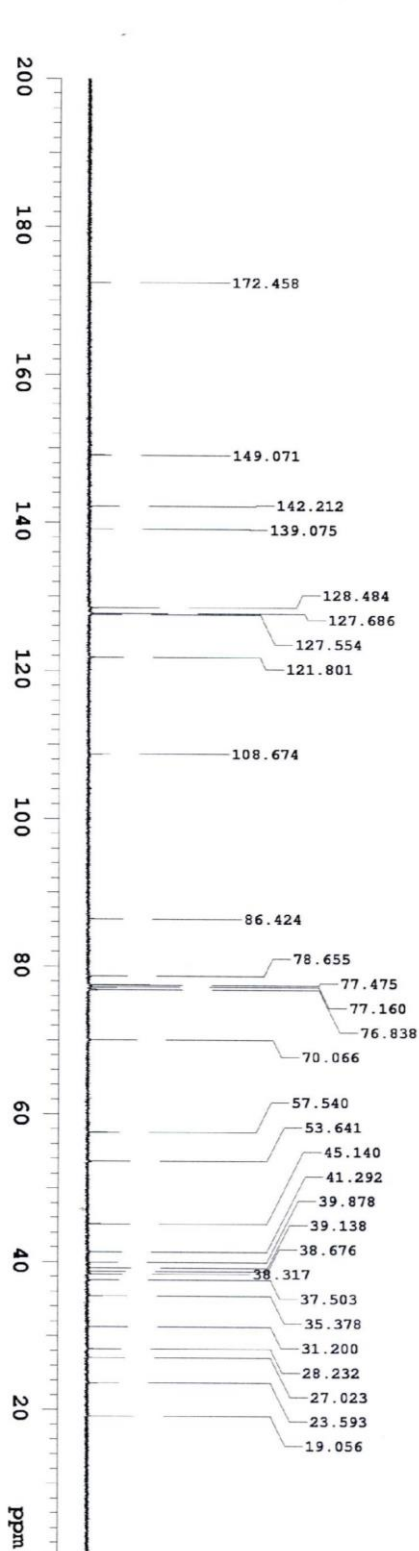

Relax. delay 1.000 sec  
 Pulse 45.0 degrees  
 Acq. time 1.300 sec  
 Width 24154.6 Hz  
 272 repetitions  
 OBSERVE C13, 100.5794488 MHz  
 DECOUPLE H1, 399.9994929 MHz  
 Power 38 dB  
 continuously on  
 WALTZ-16 modulated  
 DATA PROCESSING  
 Line broadening 0.5 Hz  
 FT size 65536  
 Total time 42 min, 58 sec

Sample: AC 4-baz  
 Pulse Sequence: s2pul  
 Date: Jan 23 2012  
 Solvent: cdcl3  
 Temp: 20.0 C / 293.1 K  
 Operator: walkup  
 Mercury-400BB "Felix"

Chentsova



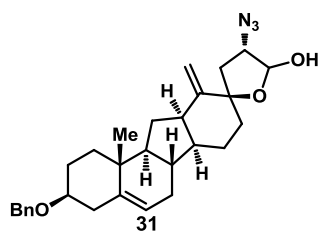

<sup>1</sup>H NMR (400 MHz, CDCl<sub>3</sub>)

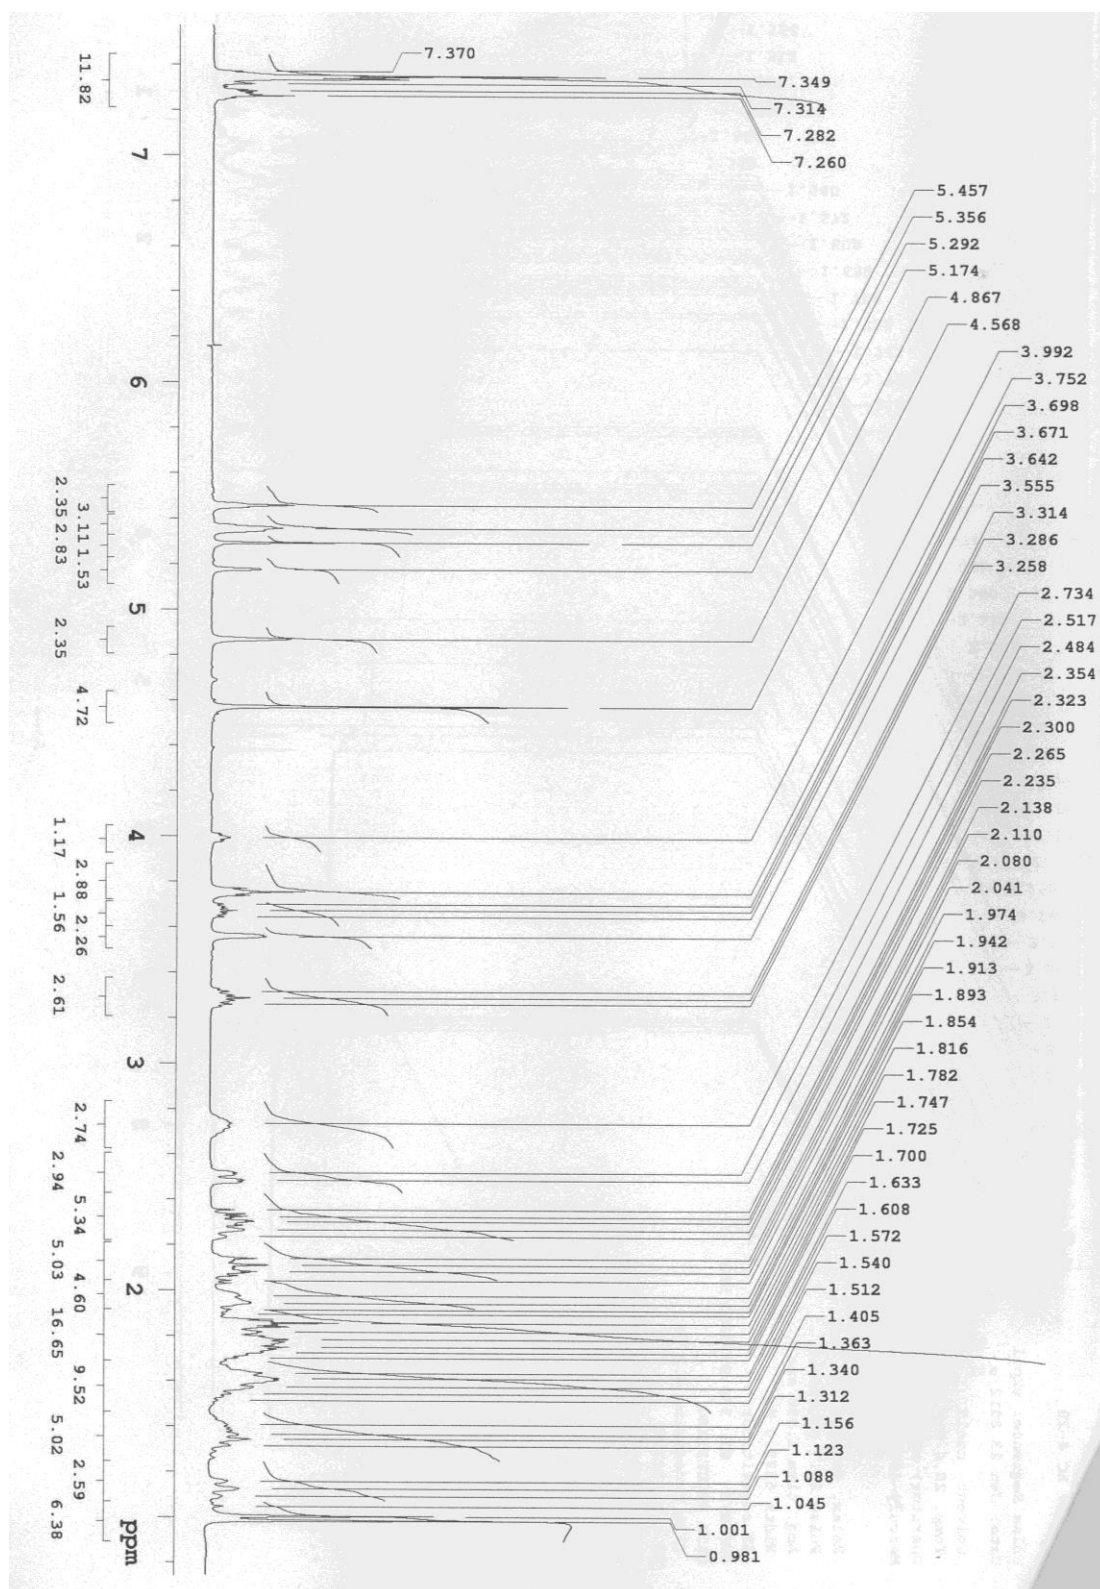

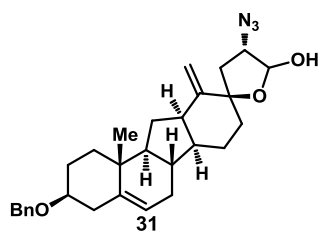

<sup>13</sup>C NMR (100 MHz, CDCl<sub>3</sub>)

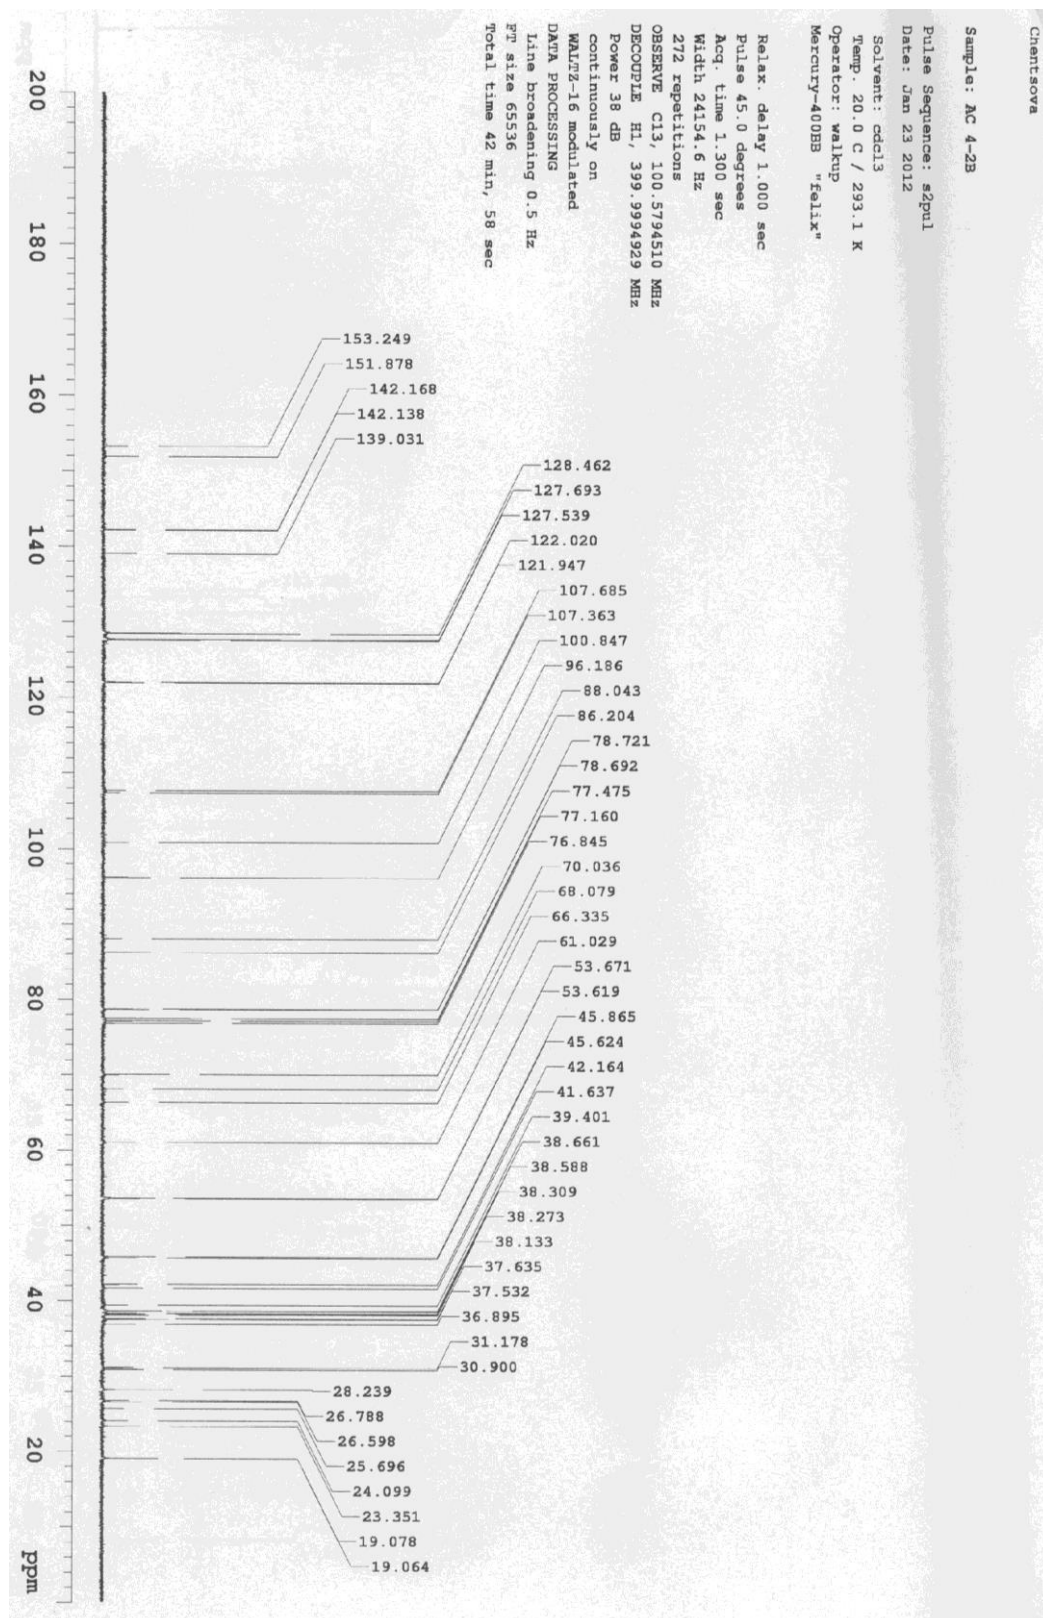



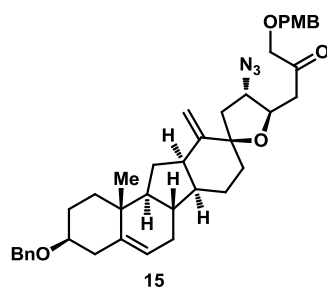

$^1\text{H}$  NMR (300 MHz,  $\text{CDCl}_3$ )

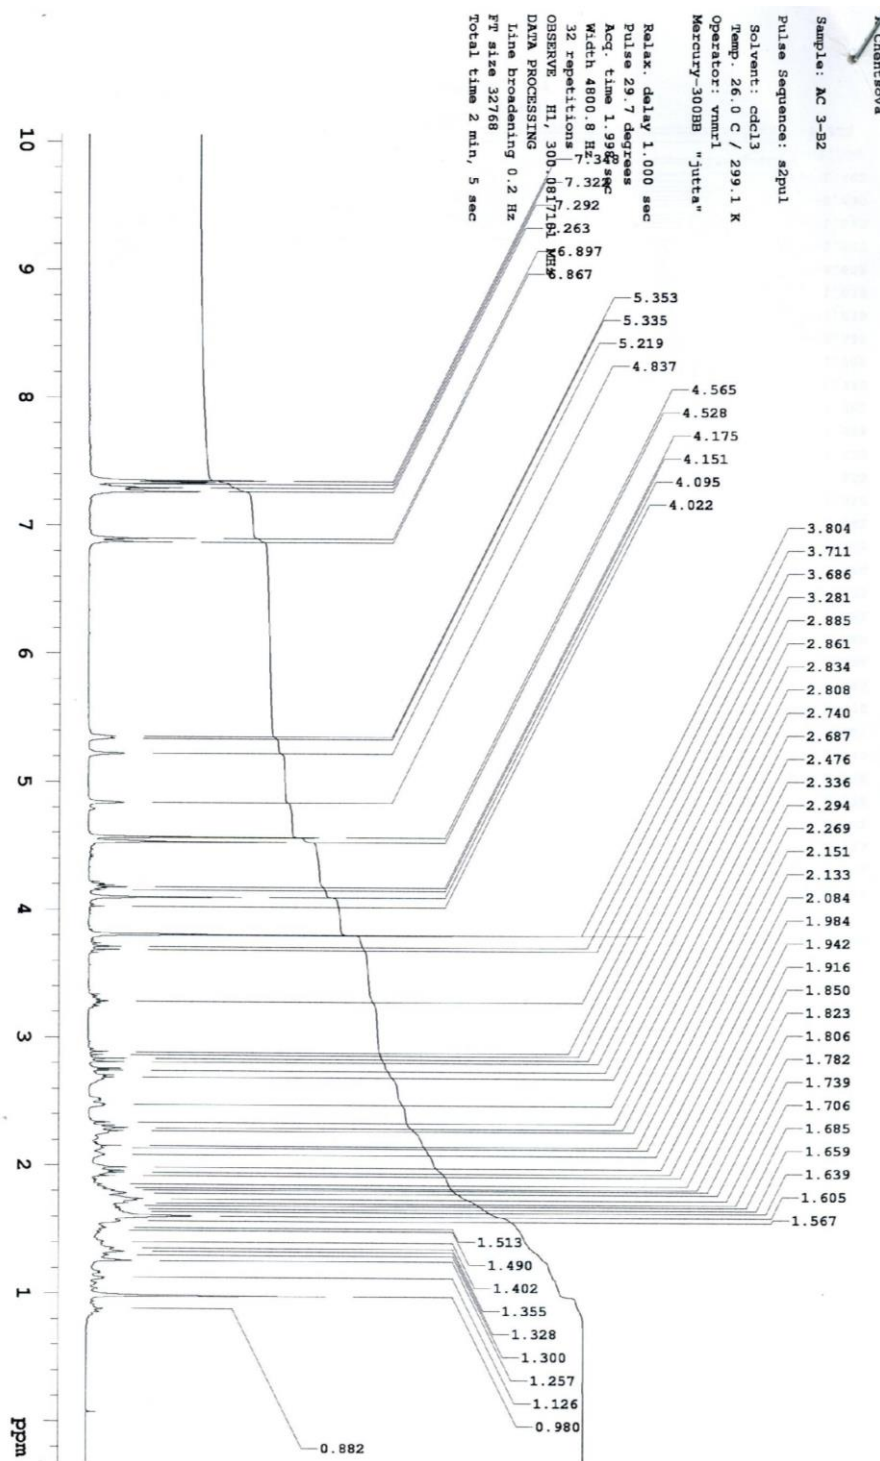

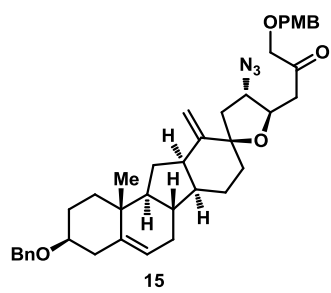

$^{13}\text{C}$  NMR (100 MHz,  $\text{CDCl}_3$ )

A. Chentsova

Sample: AC3-3B1

Pulse Sequence: szpul

Date: Apr 27 2011

Solvent: cdcl3

Temp: 26.0 C / 299.1 K

Operator: walkup

Mercury-400BB "felix"

Relax. delay 1.000 sec

Pulse 45.0 degrees

Acq. time 1.300 sec

Width 24154.6 Hz

672 repetitions

OBSERVE C13, 100.5802663 MHz

DECODE H1, 400.0028477 MHz

Power 38 dB

continuously on

WALTZ-16 modulated

DATA PROCESSING

Line broadening 0.5 Hz

FT size 65536

Total time 42 min, 58 sec

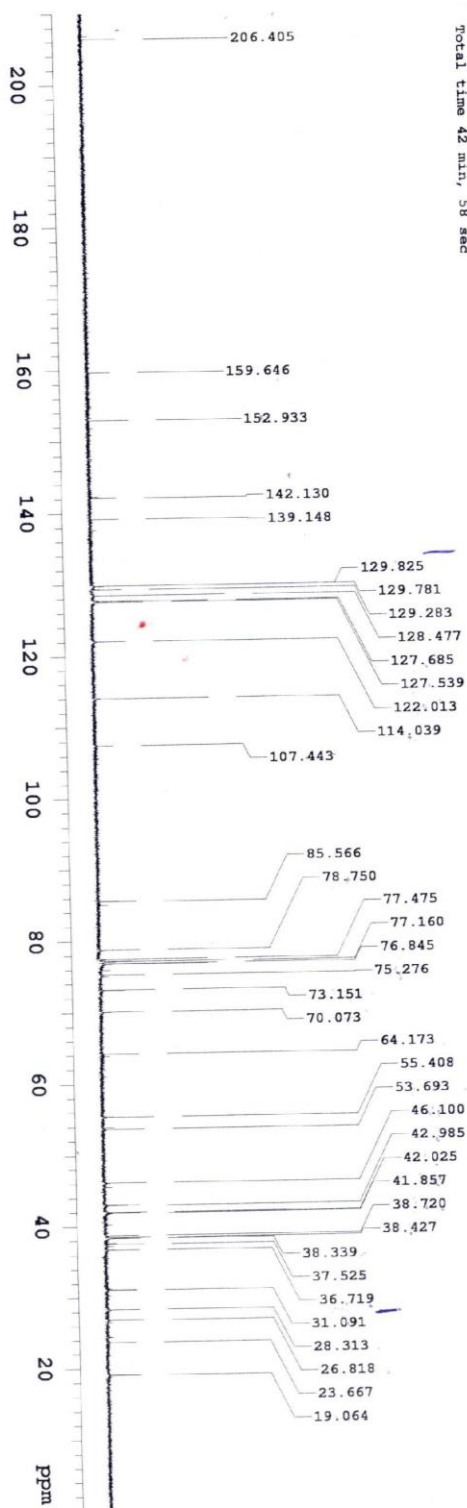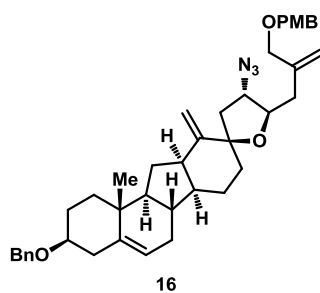

$^1\text{H}$  NMR (400 MHz,  $\text{CDCl}_3$ )

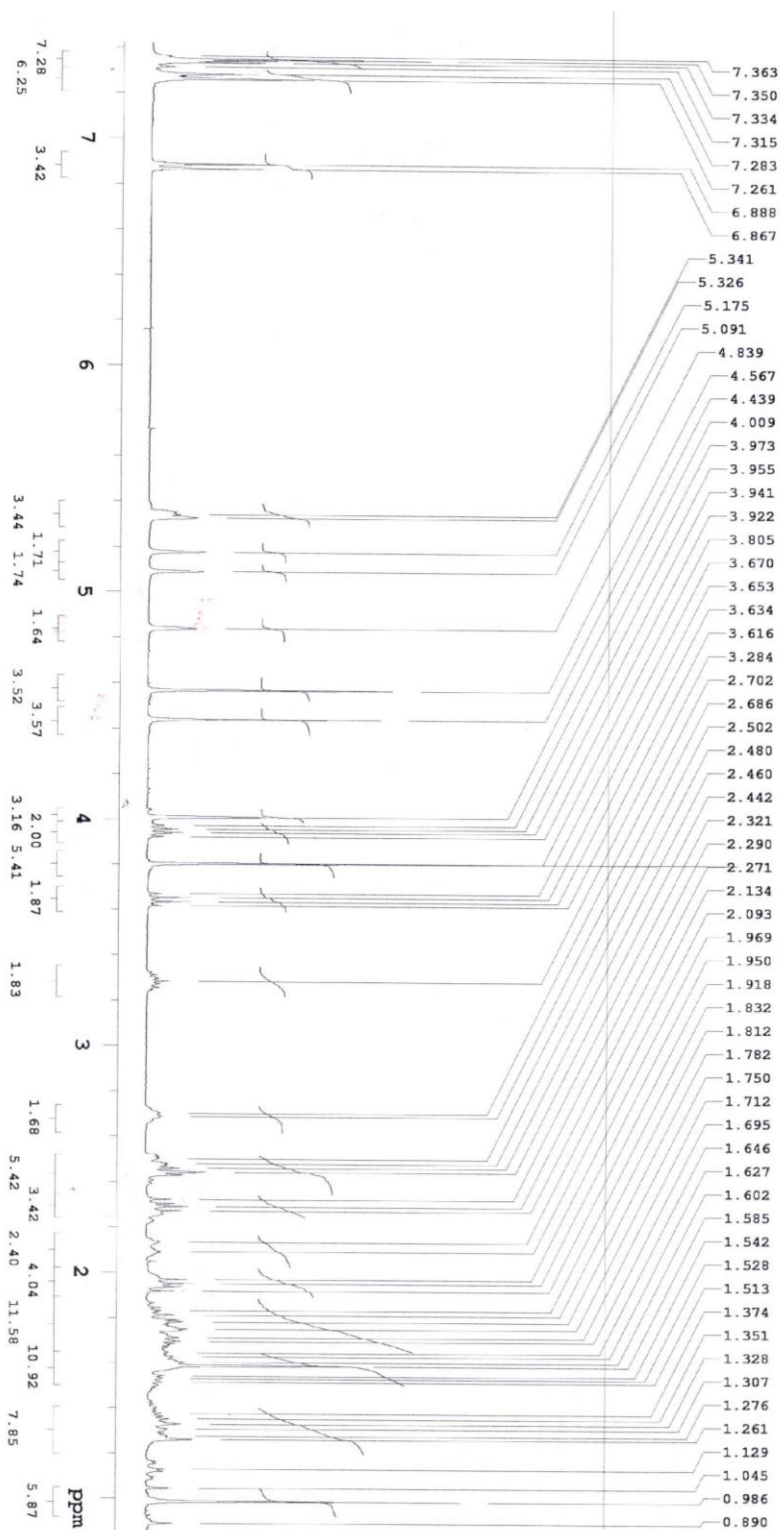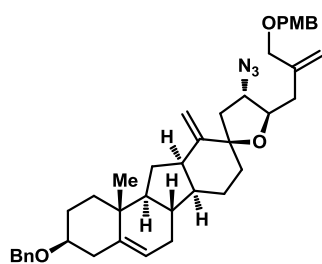

16

APT (100 MHz, CDCl<sub>3</sub>)

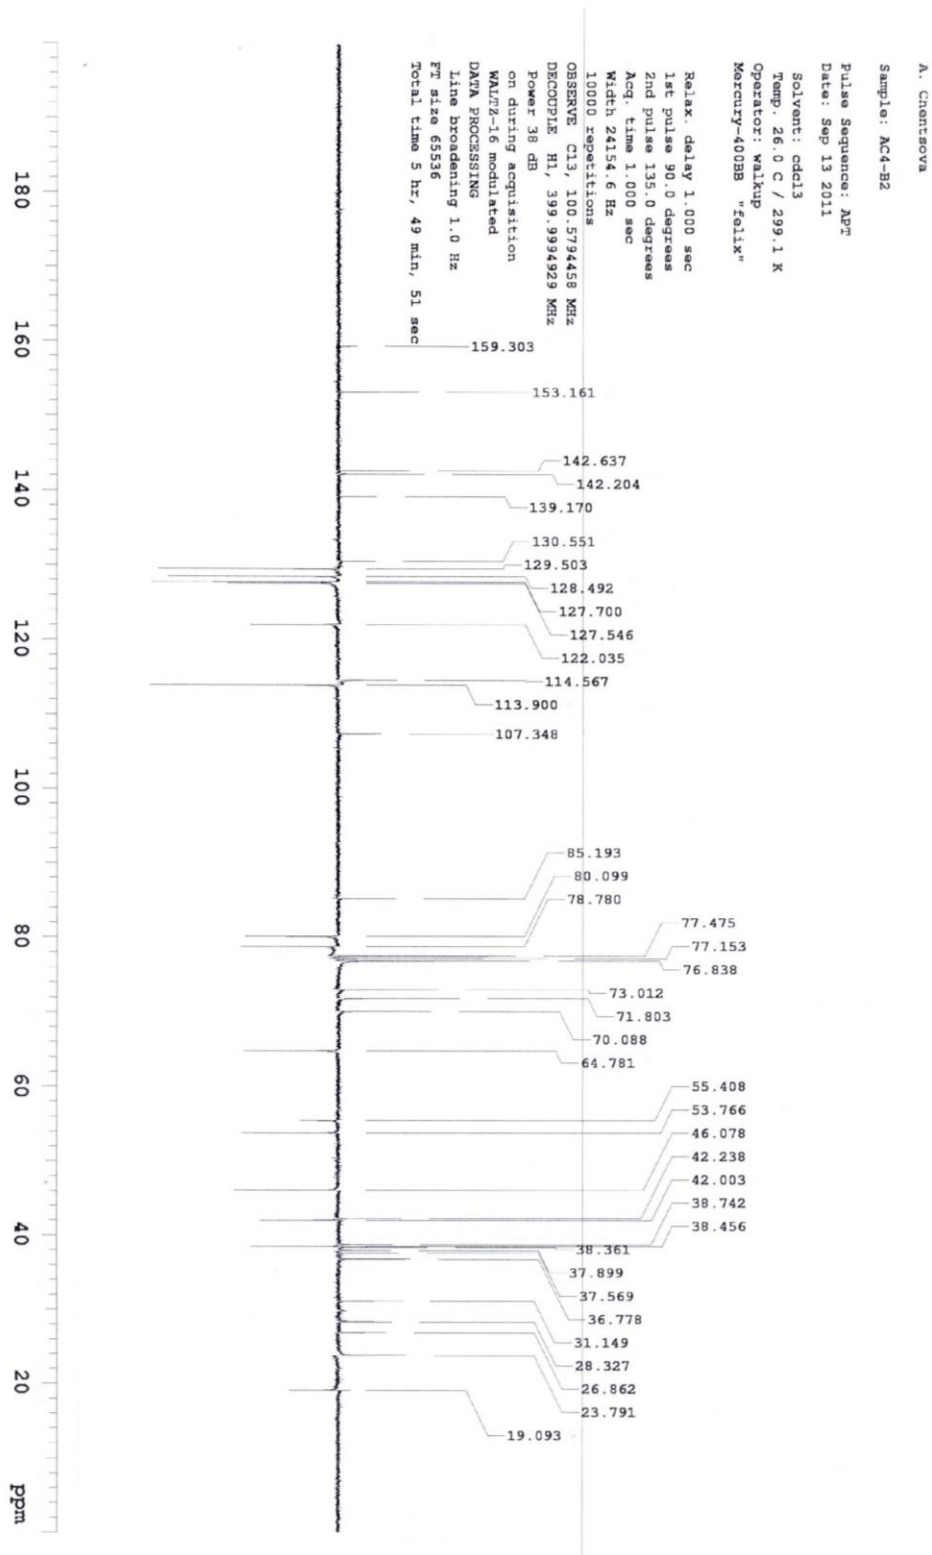

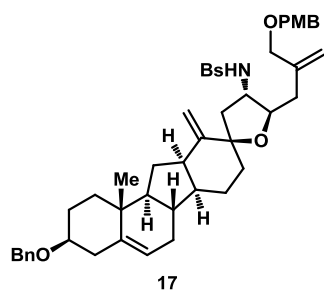

$^1\text{H}$  NMR (400 MHz,  $\text{CDCl}_3$ )

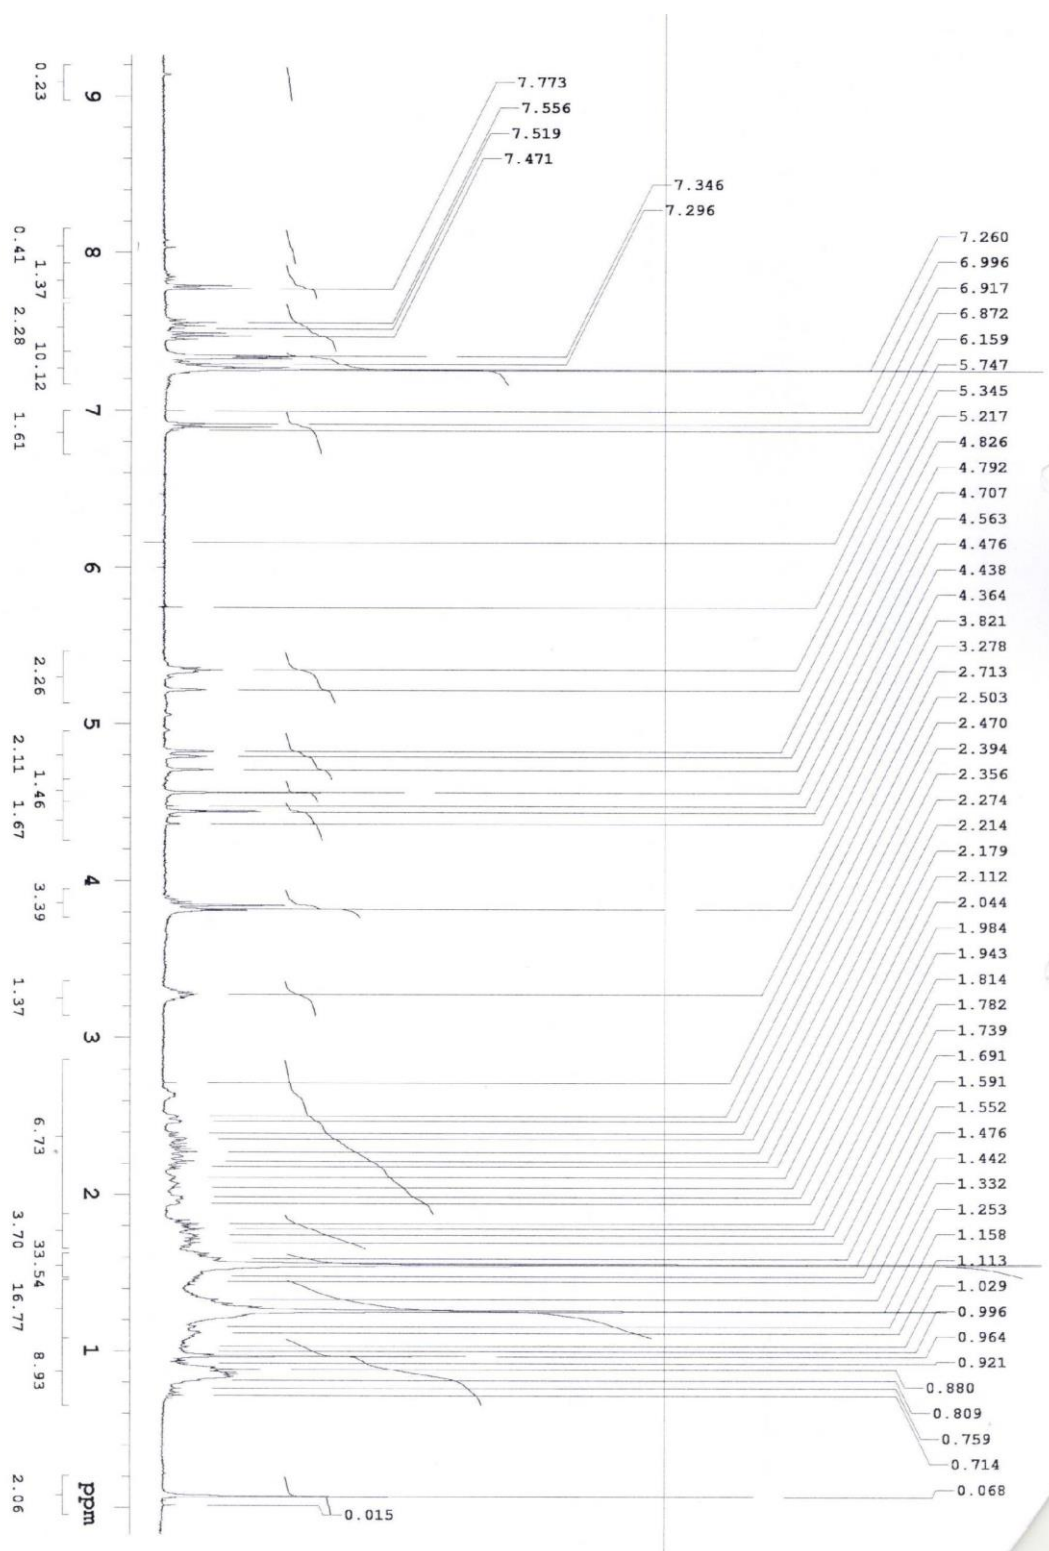

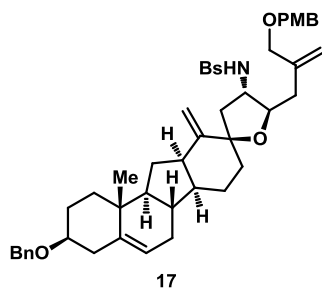

$^{13}\text{C}$  NMR (75 MHz,  $\text{CDCl}_3$ )

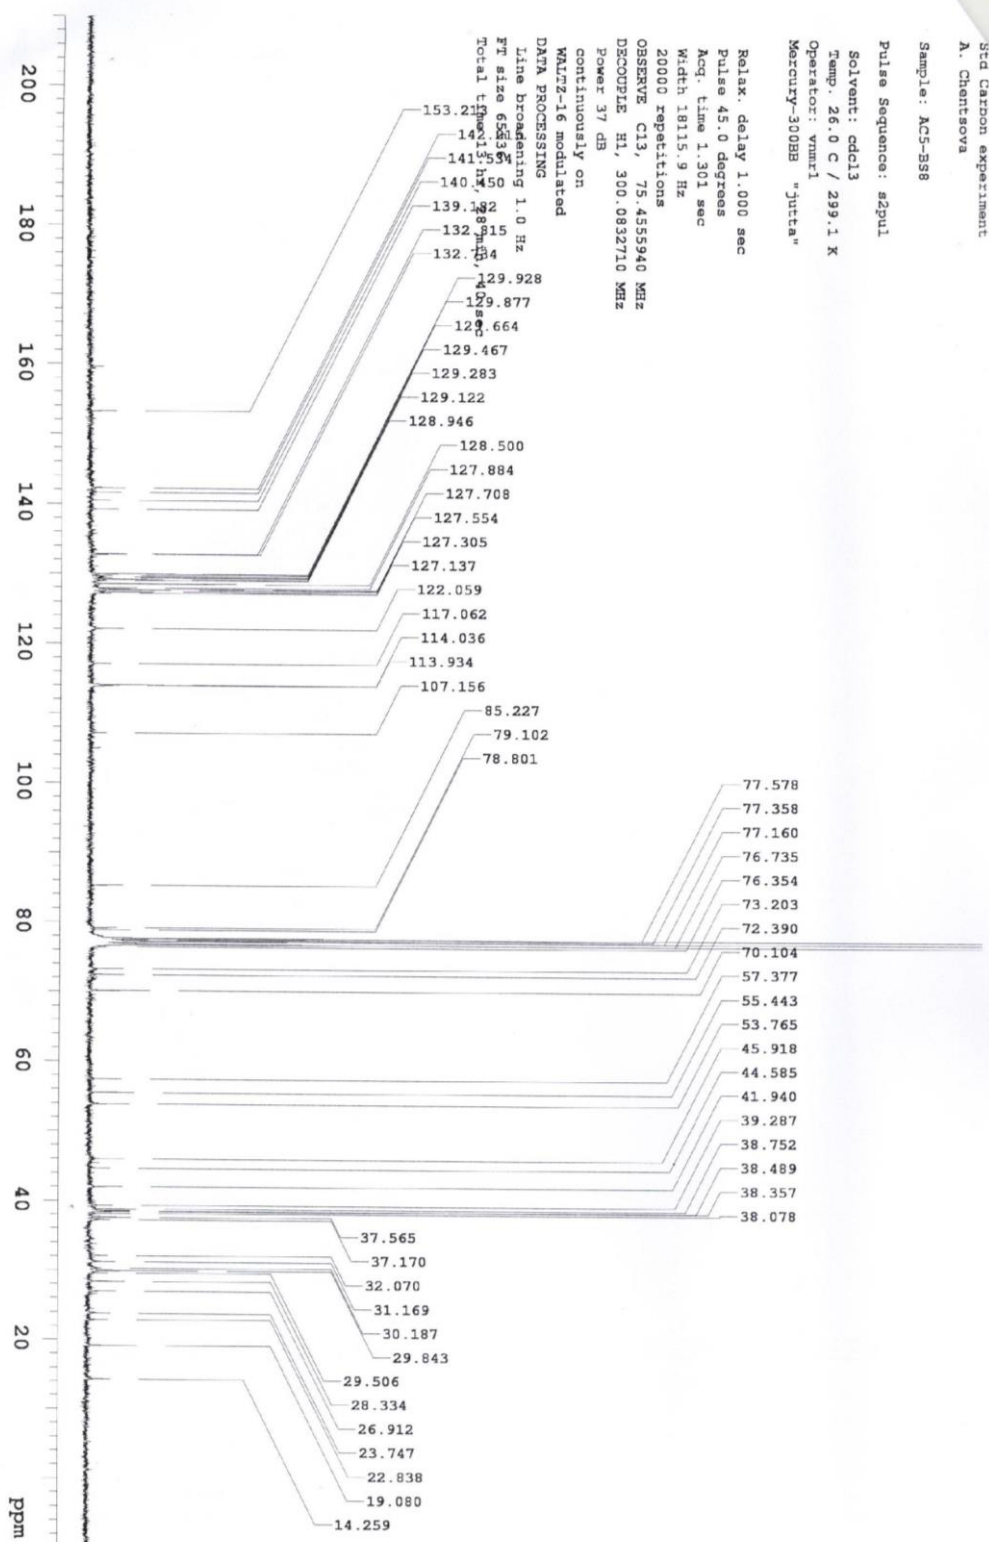



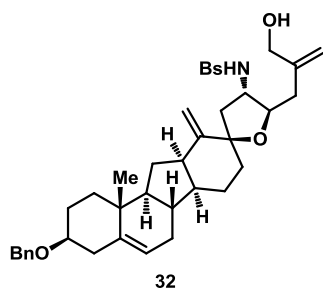

$^1\text{H}$  NMR (400 MHz,  $\text{CDCl}_3$ )

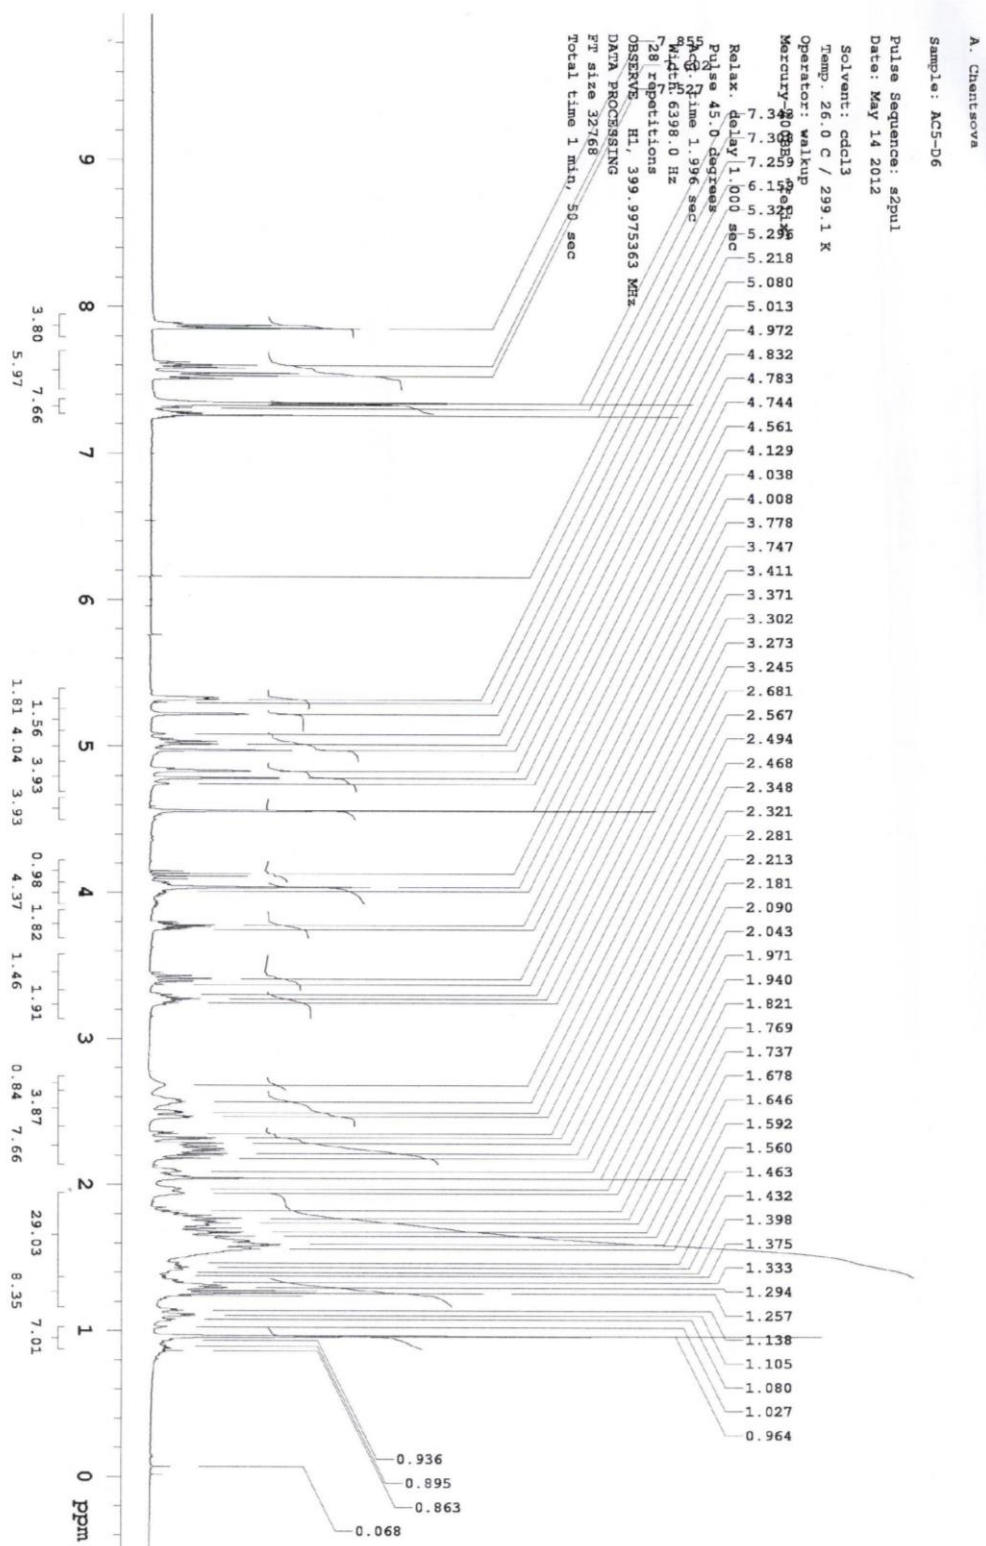



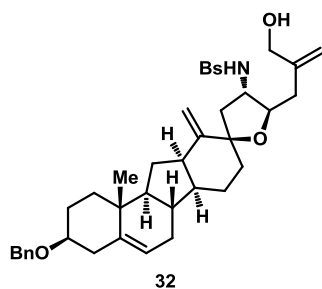

APT (75 MHz, CDCl<sub>3</sub>)

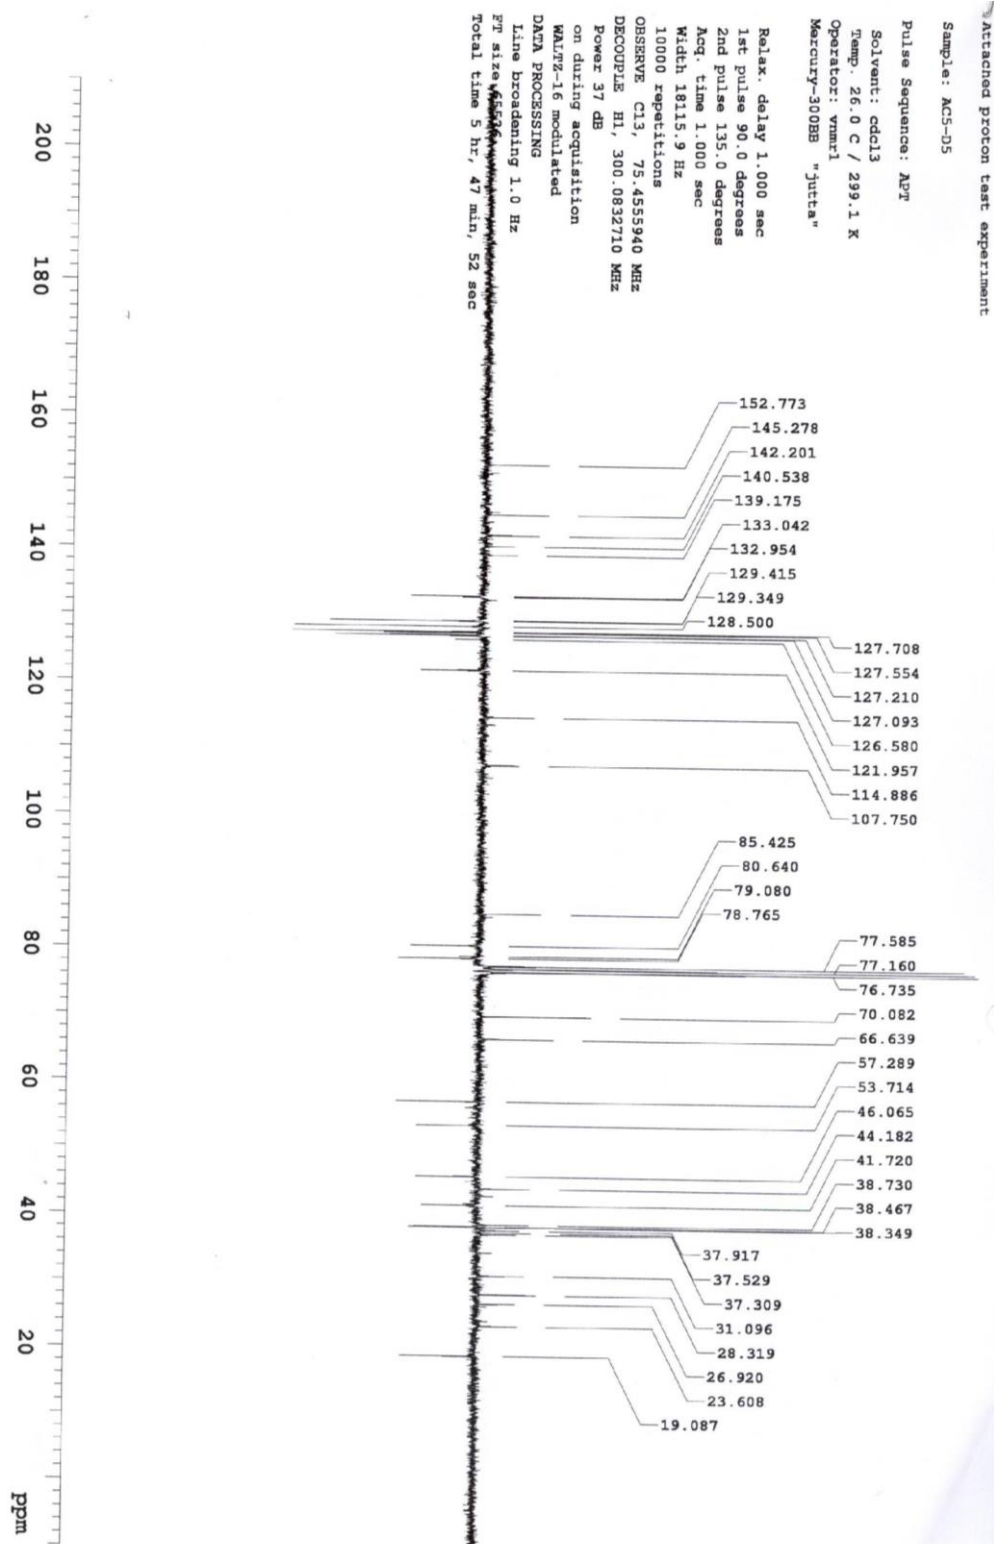

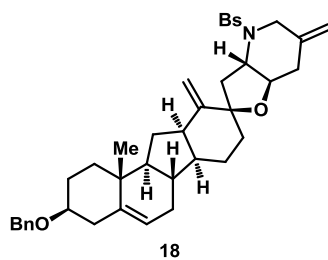

$^1\text{H}$  NMR (300 MHz,  $\text{CDCl}_3$ )

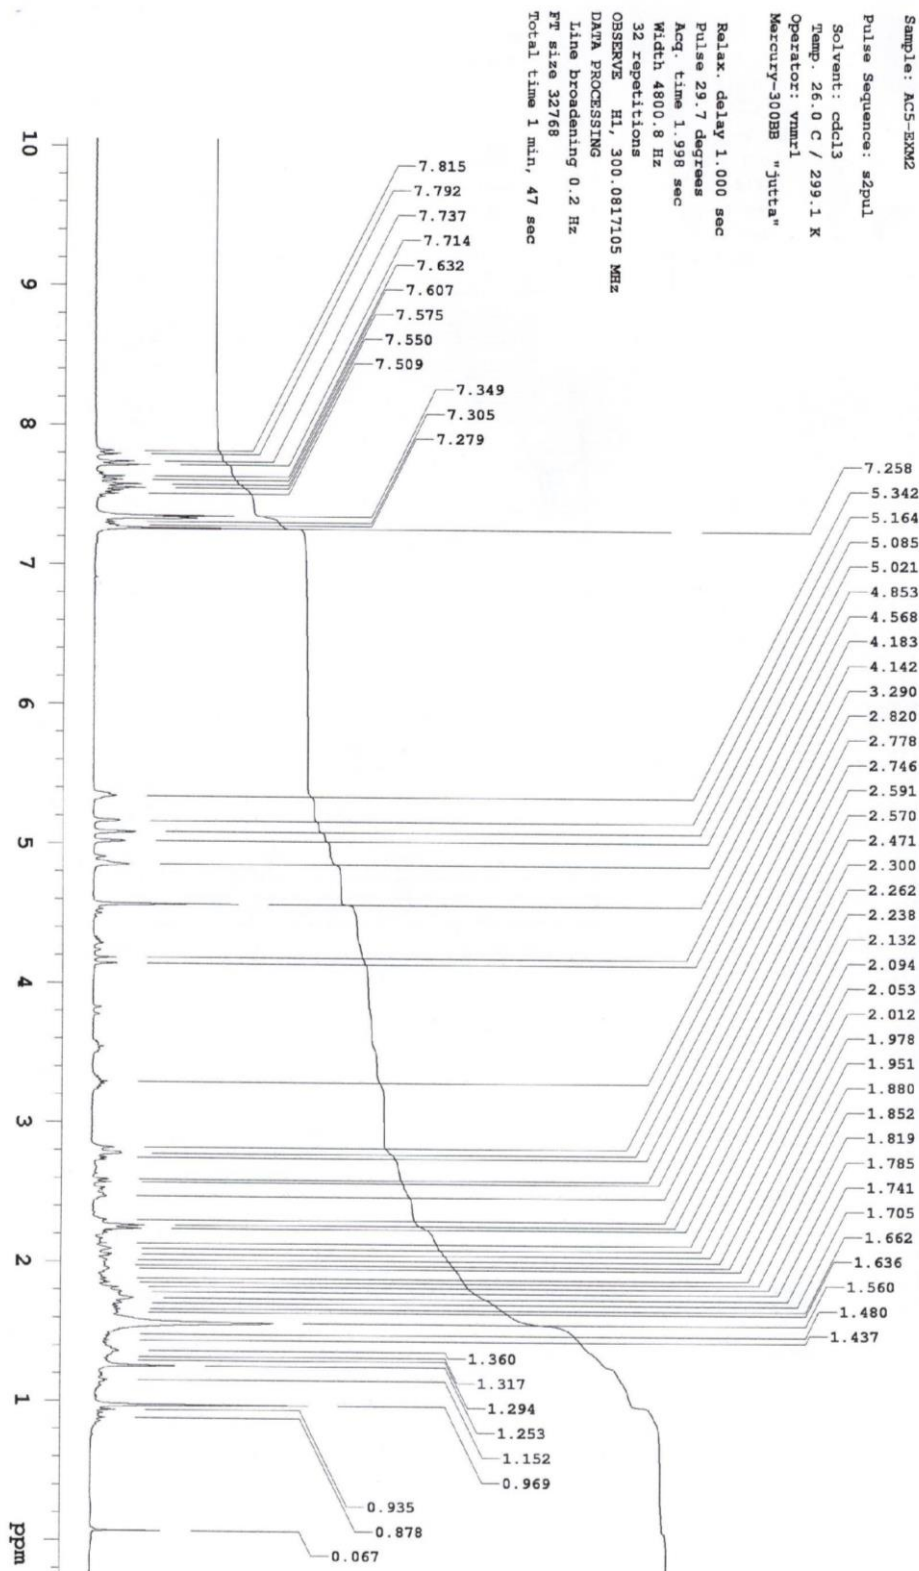

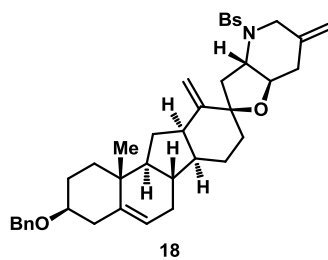

APT (100 MHz, CDCl<sub>3</sub>)

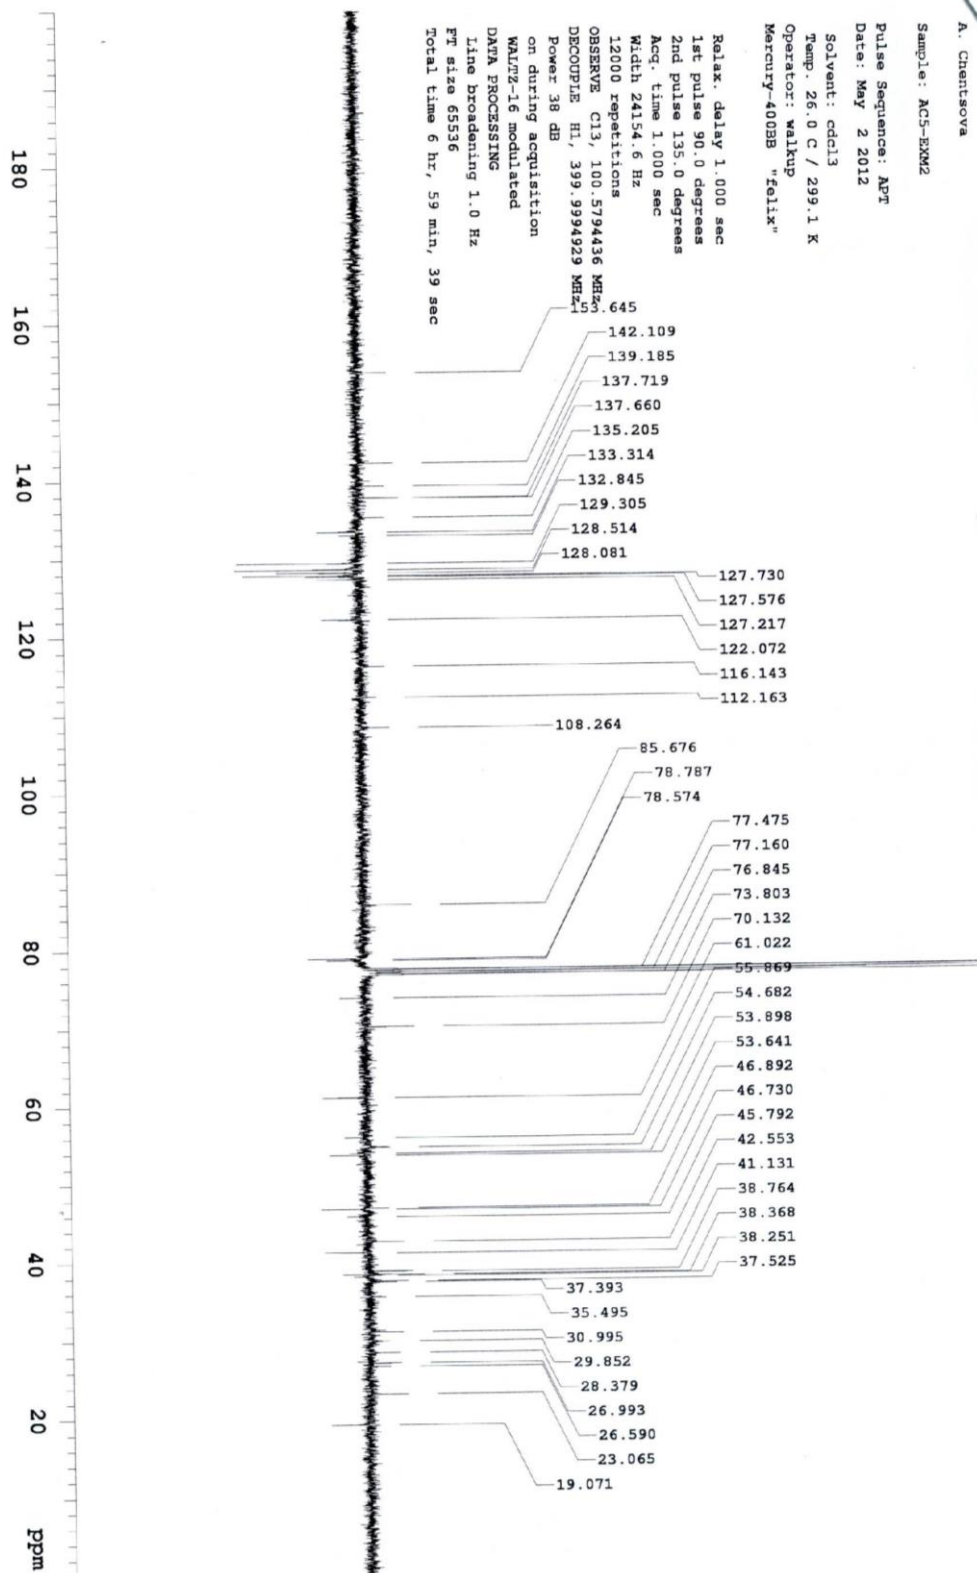

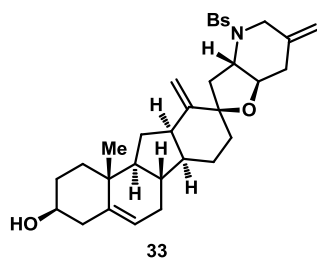

<sup>1</sup>H NMR (400 MHz, CDCl<sub>3</sub>)

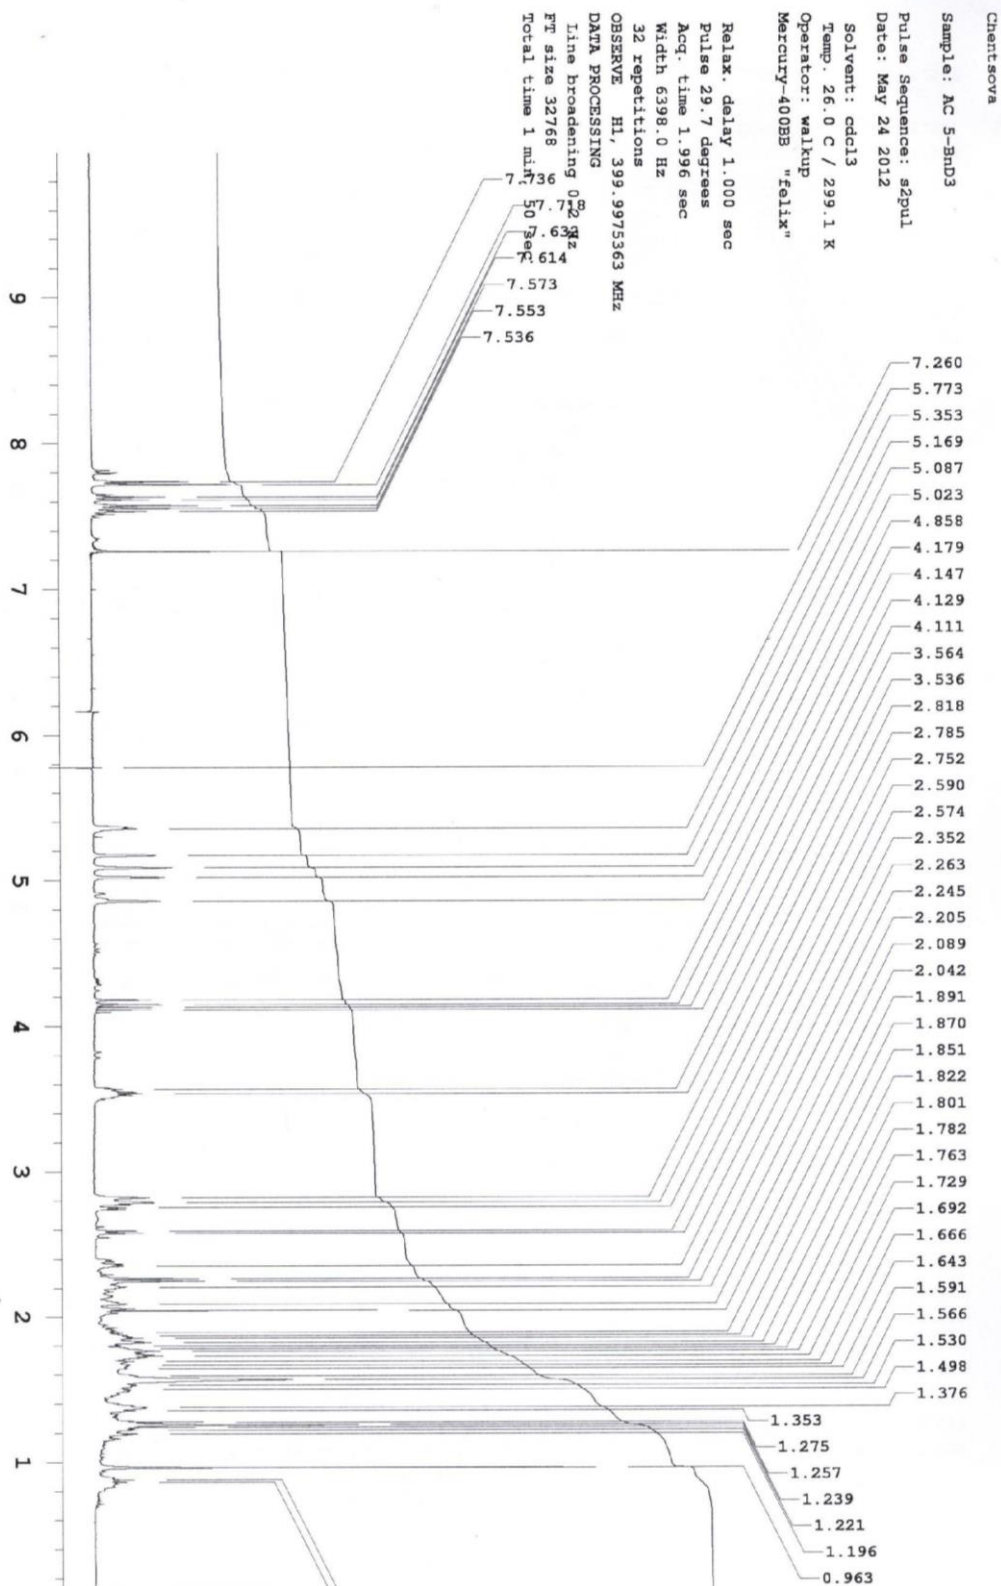

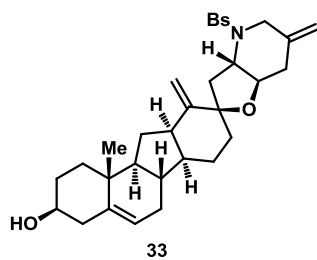

$^{13}\text{C}$  NMR (100 MHz,  $\text{CDCl}_3$ )

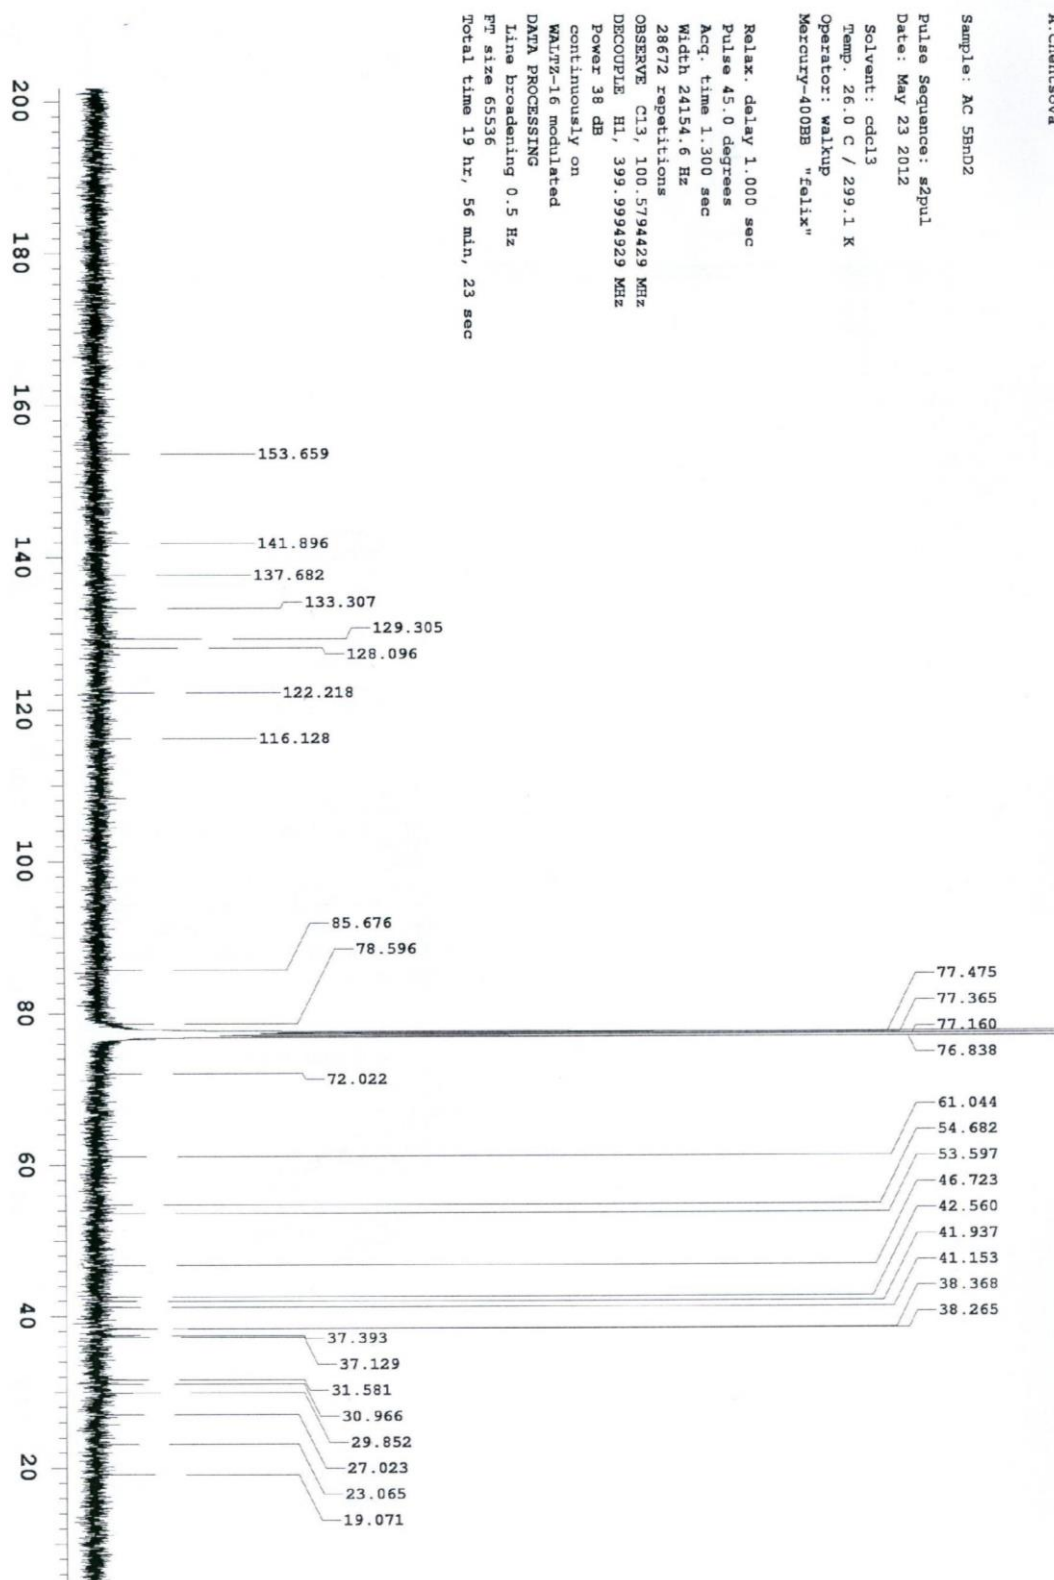



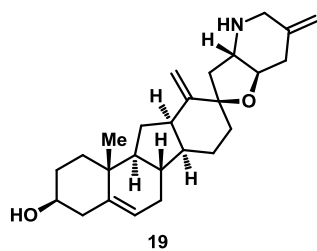

$^1\text{H}$  NMR (400 MHz,  $\text{CDCl}_3$ )

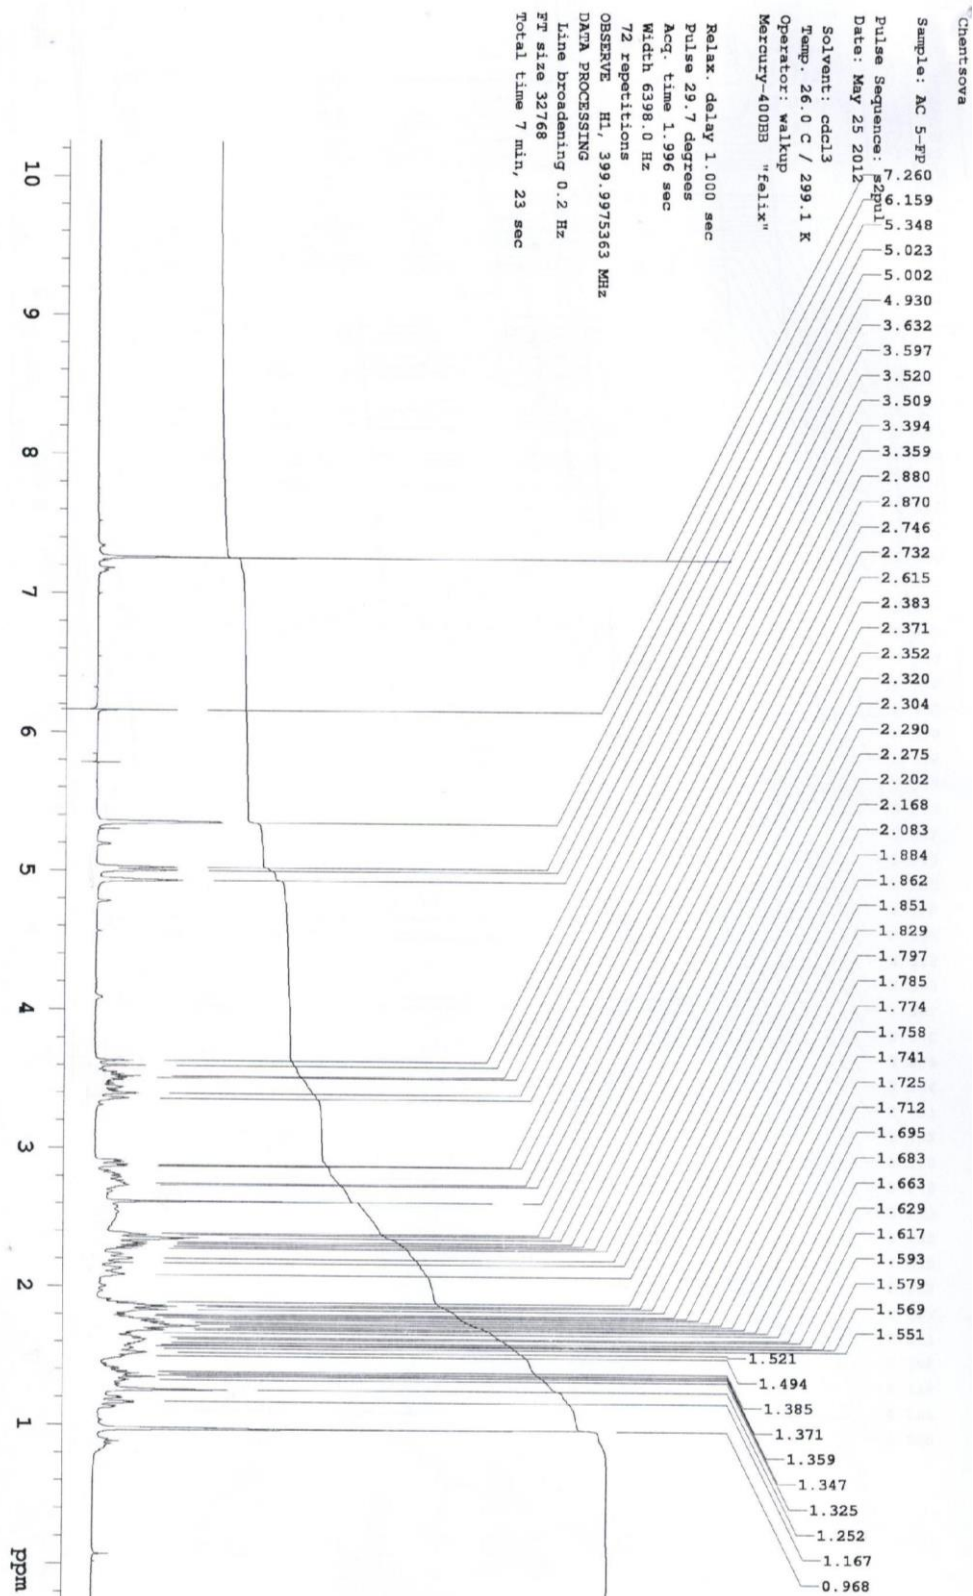

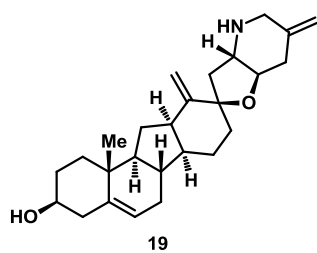

$^{13}\text{C}$  NMR (175 MHz,  $\text{CDCl}_3$ )

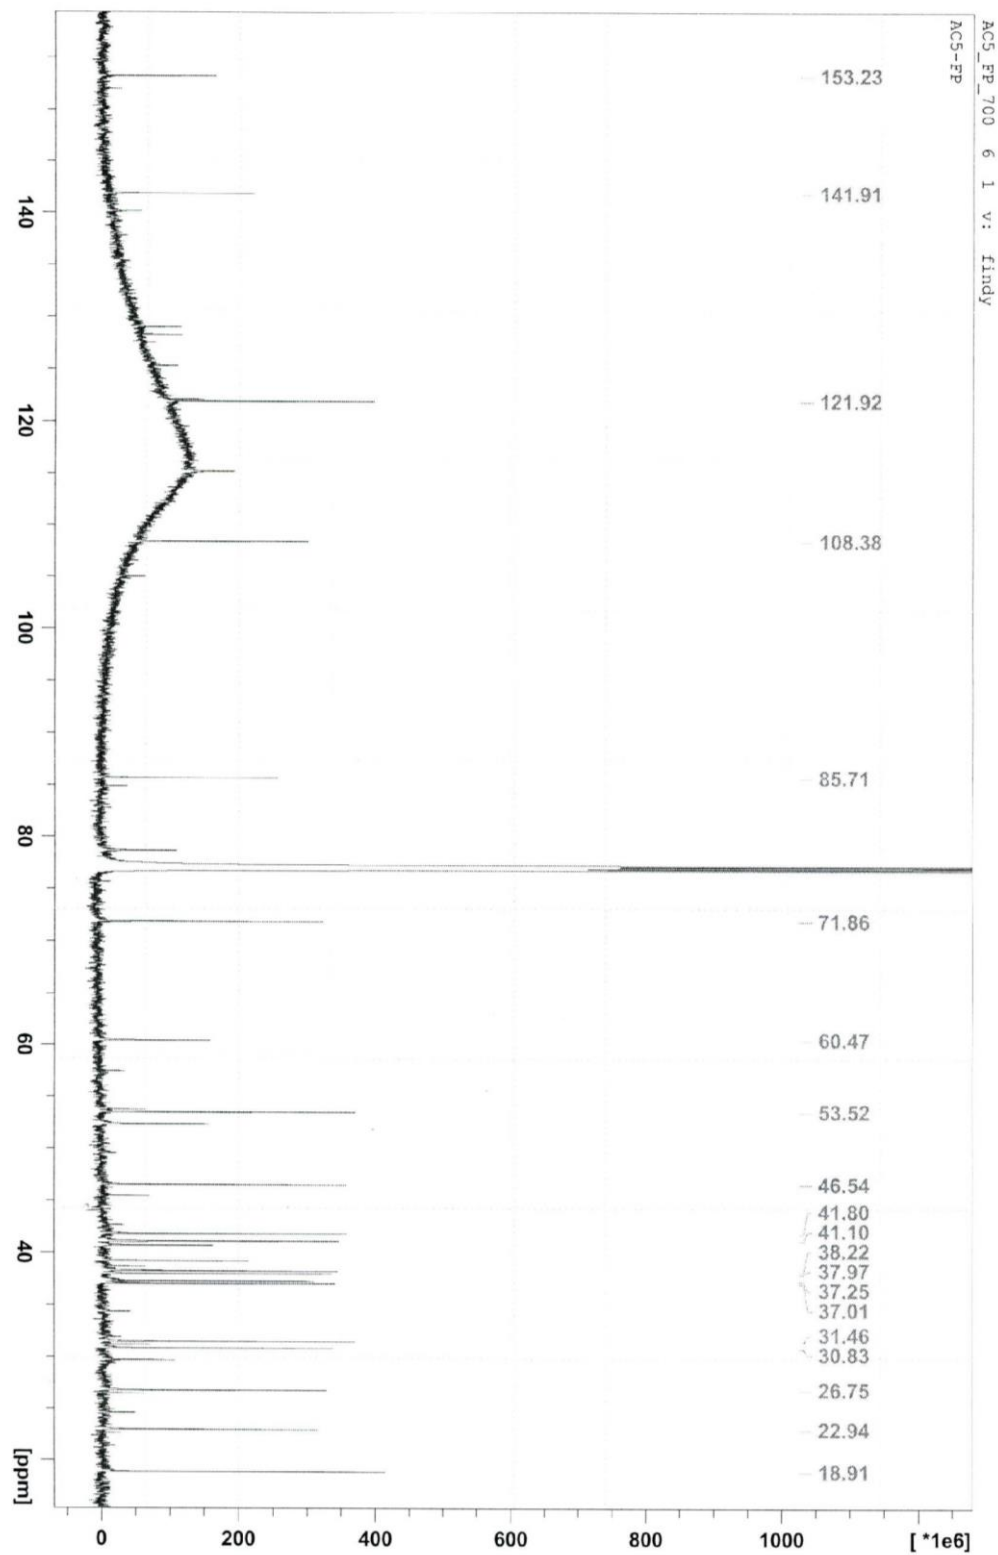

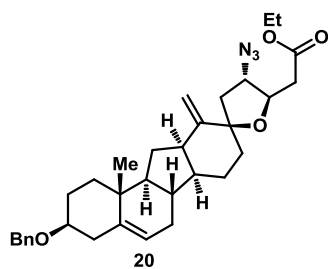

$^1\text{H}$  NMR (400 MHz,  $\text{CDCl}_3$ )

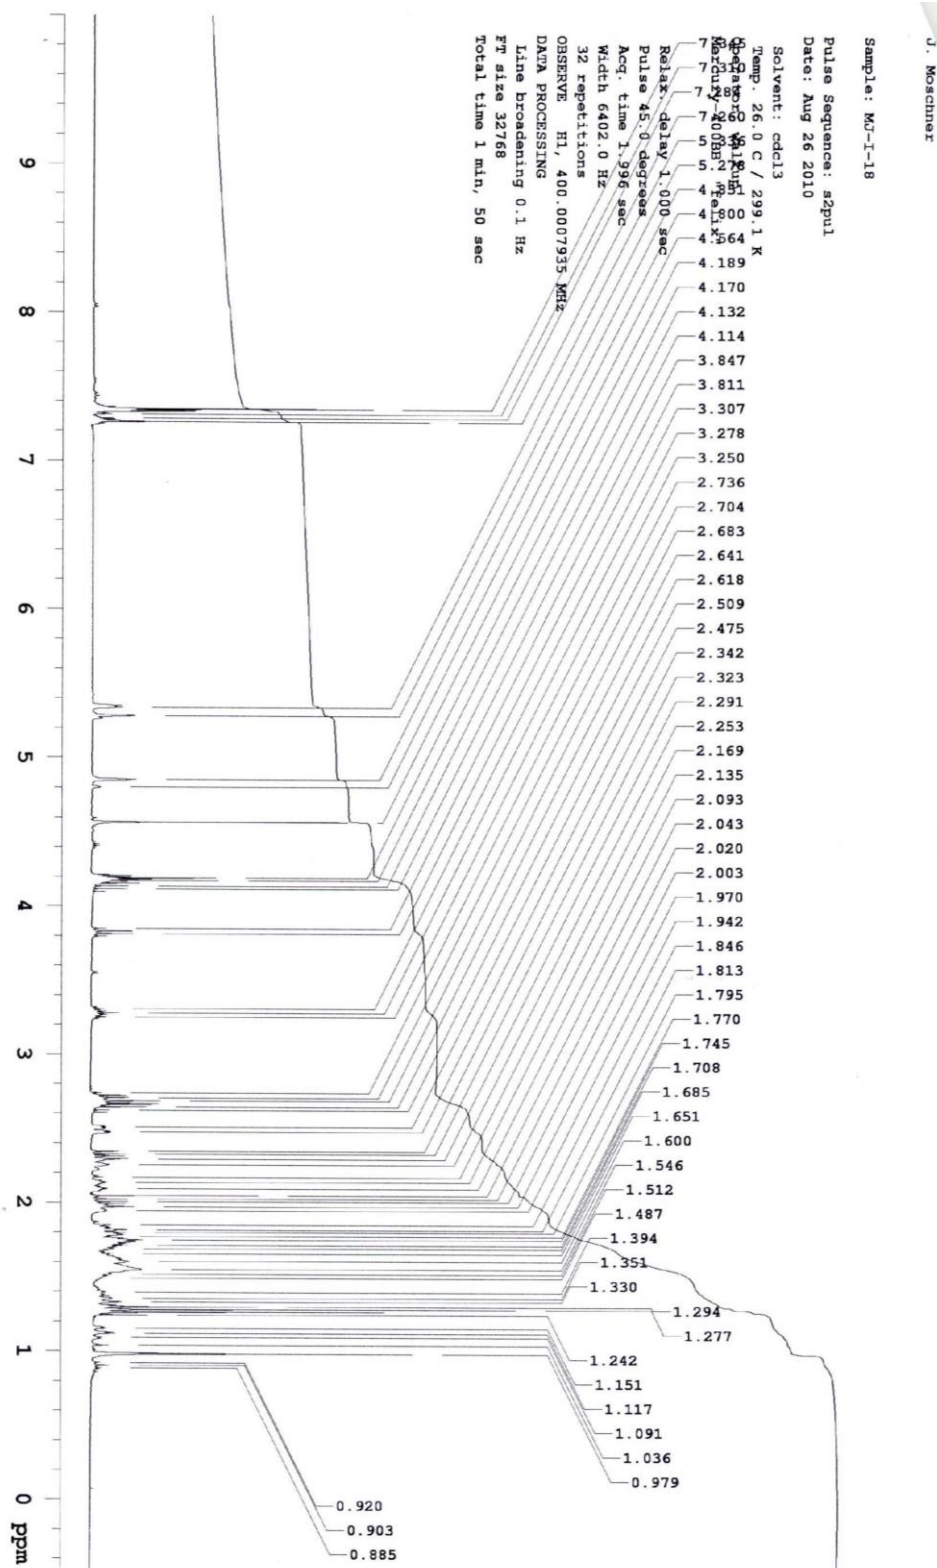



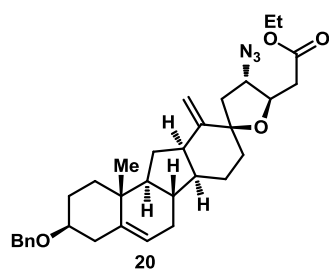

$^{13}\text{C}$  NMR (75 MHz,  $\text{CDCl}_3$ )

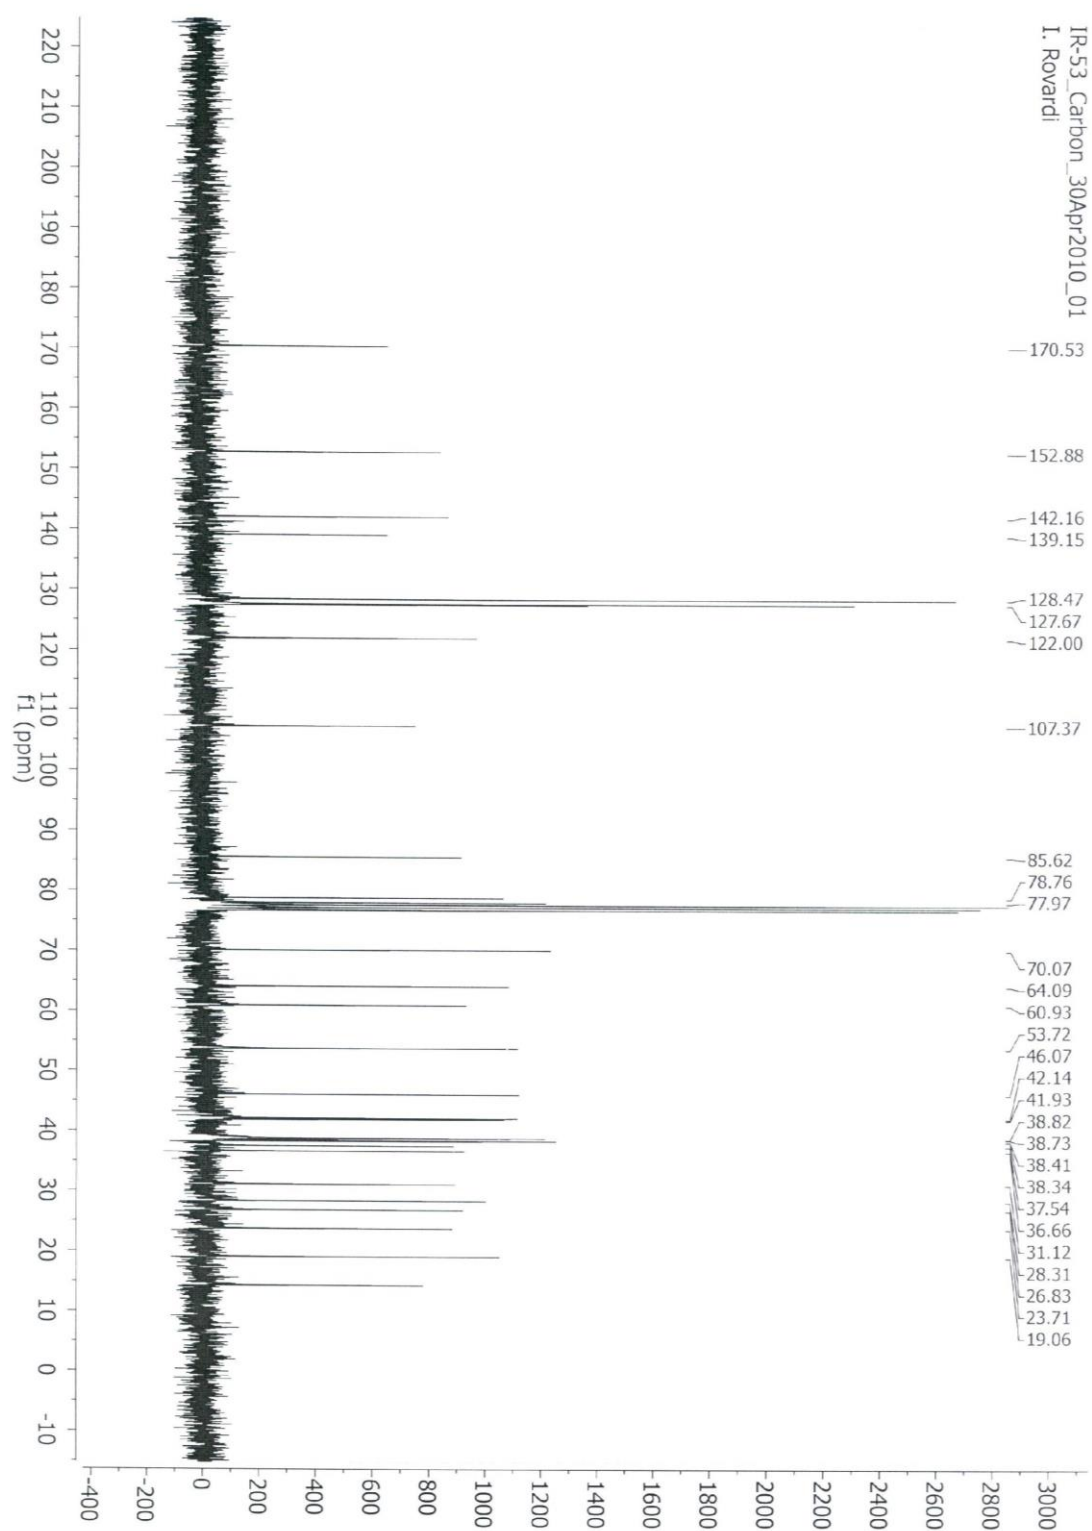

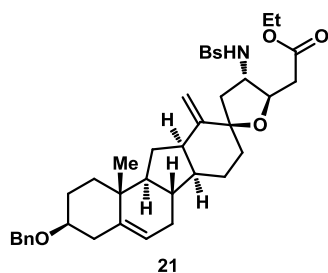

$^1\text{H}$  NMR (300 MHz,  $\text{CDCl}_3$ )

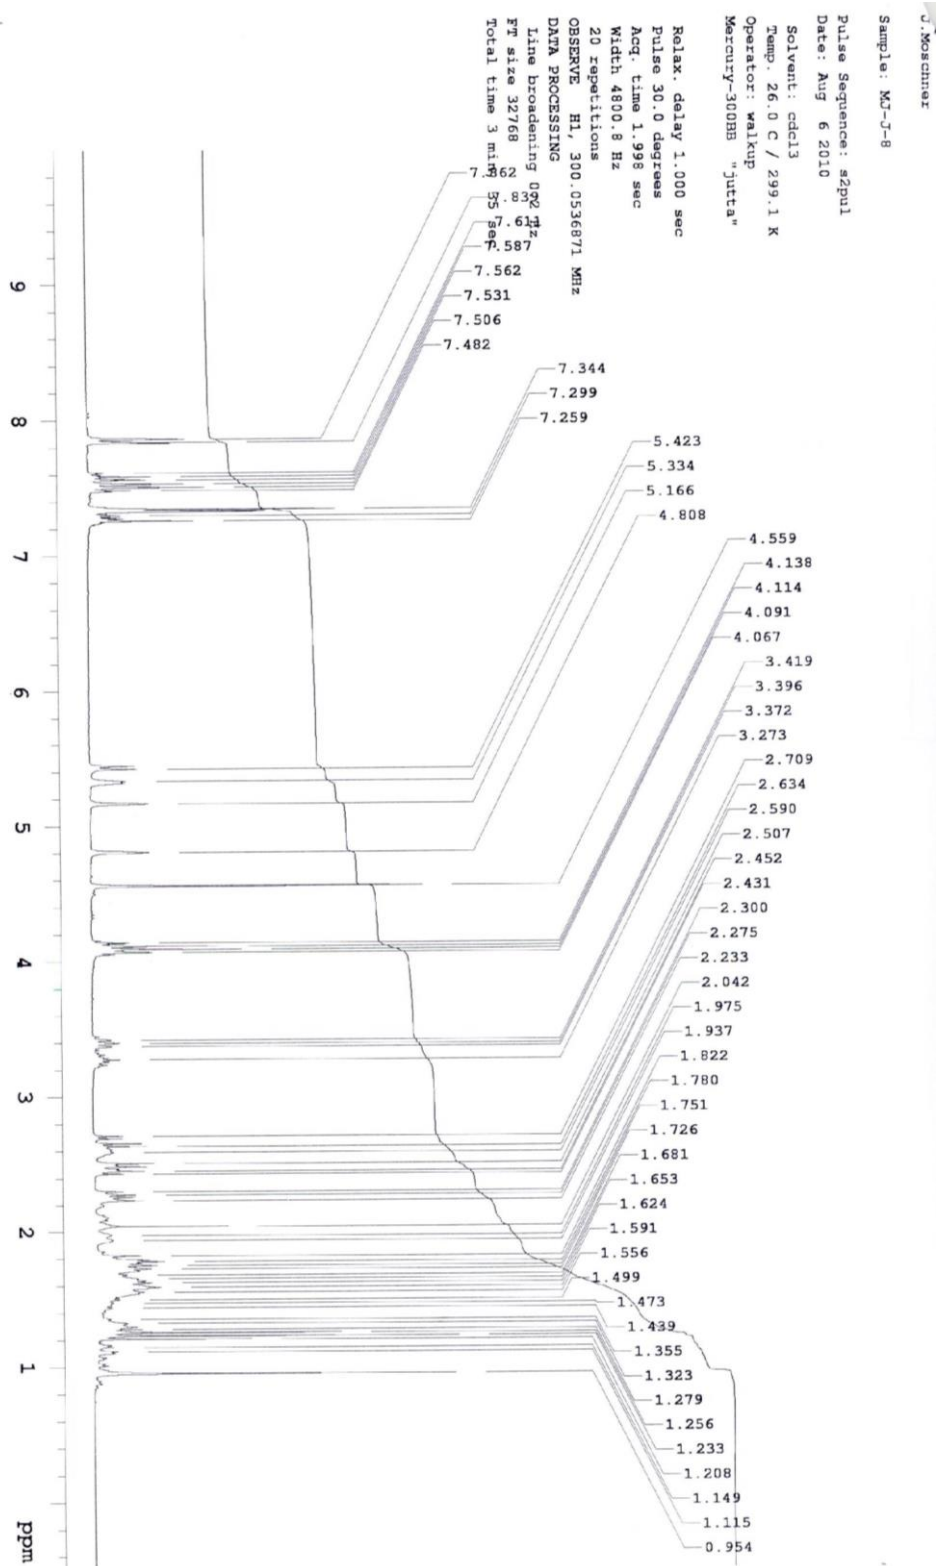

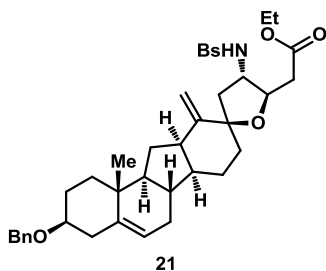

$^{13}\text{C}$  NMR (75 MHz,  $\text{CDCl}_3$ )

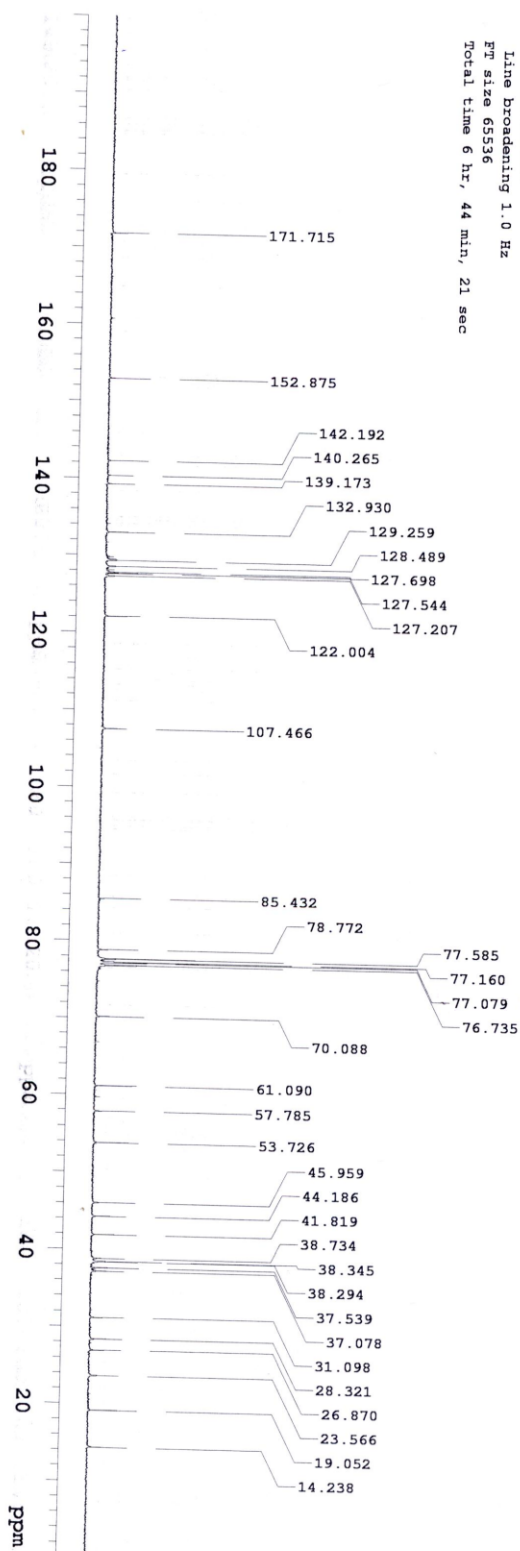

Sample: MJ-I-25A  
 Pulse Sequence: zgpg30  
 Date: Sep 8 2010  
 Solvent: cdcl3  
 Temp: 26.0 C / 299.1 K  
 Operator: walkup  
 Mercury-300MR "jutta"  
 Relax. delay 1.000 sec  
 Pulse 45.0 degrees  
 Acq. time 1.301 sec  
 Width 18115.9 Hz  
 10000 repetitions  
 OBSERVE C13, 75.4485479 MHz  
 DECOUPLE H1, 300.0551900 MHz  
 Power 42 dB  
 continuously on  
 WALTZ-16 modulated  
 DATA PROCESSING  
 Line broadening 1.0 Hz  
 FT size 65536  
 Total time 6 hr, 44 min, 21 sec

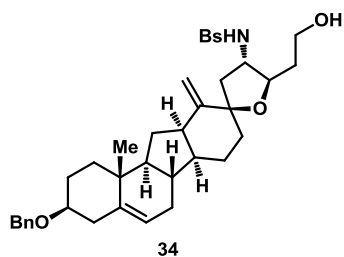

$^1\text{H}$  NMR (300 MHz,  $\text{CDCl}_3$ )

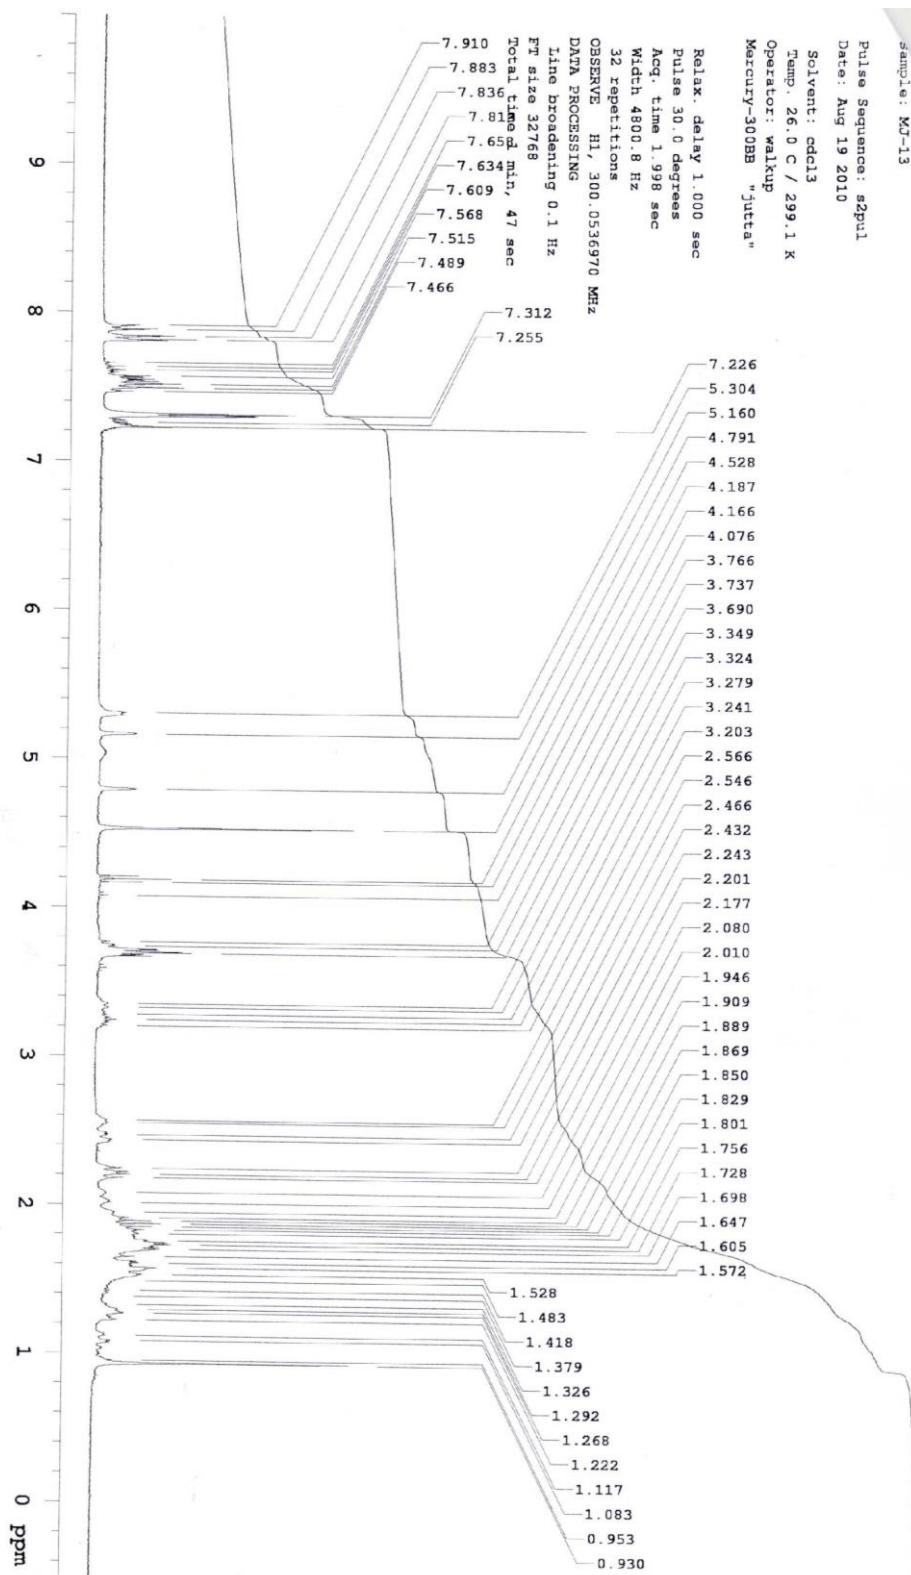

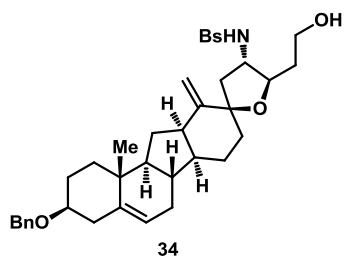

$^{13}\text{C}$  NMR (100 MHz,  $\text{CDCl}_3$ )

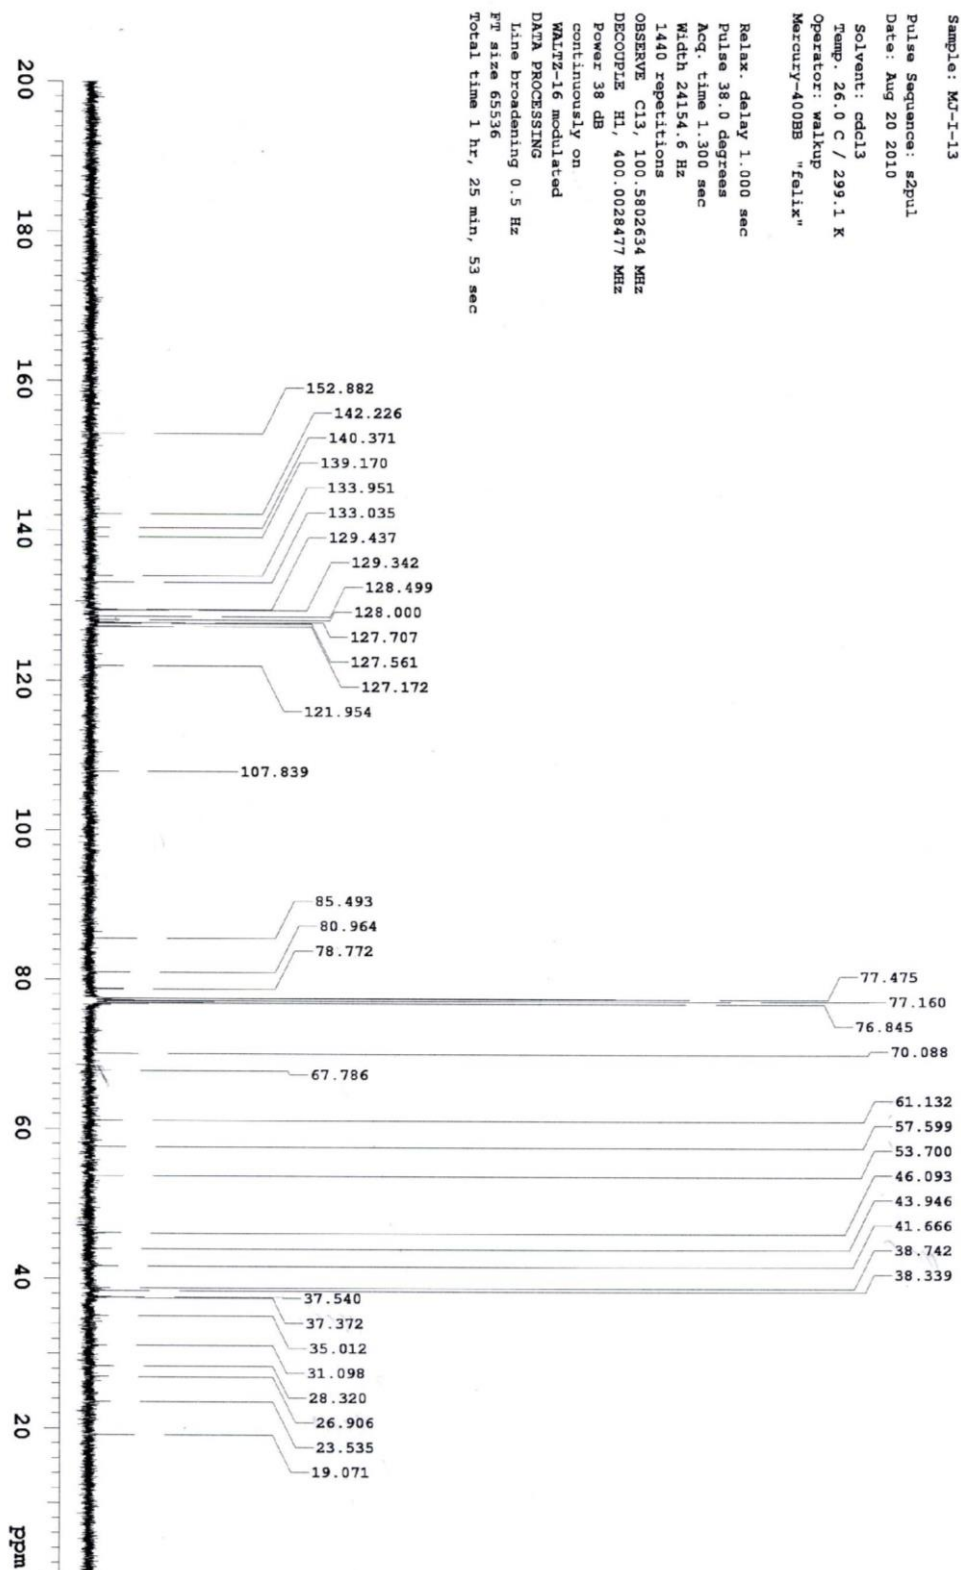

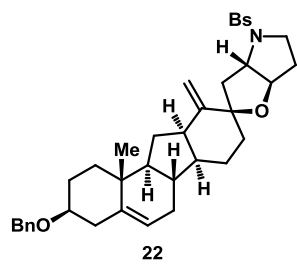

<sup>1</sup>H NMR (400 MHz, CDCl<sub>3</sub>)

J. Moschner

Sample: MJ-I-30

Pulse Sequence: s2pul

Date: Sep 21 2010

Solvent: cdcl3

Temp: 29.81°C

Operator: Wilbur

Mercury 1005B

Relax. delay 1.000 sec

Pulse 30.0 degrees

Acq. time 1.996 sec

NUC1 13C

NUC2 1H

PROB 6402.0 Hz

32 repetitions

OBSERVE H1, 400.0007935 MHz

DATA PROCESSING

Line broadening 0.2 Hz

FT size 32768

Total time 1 min, 50 sec

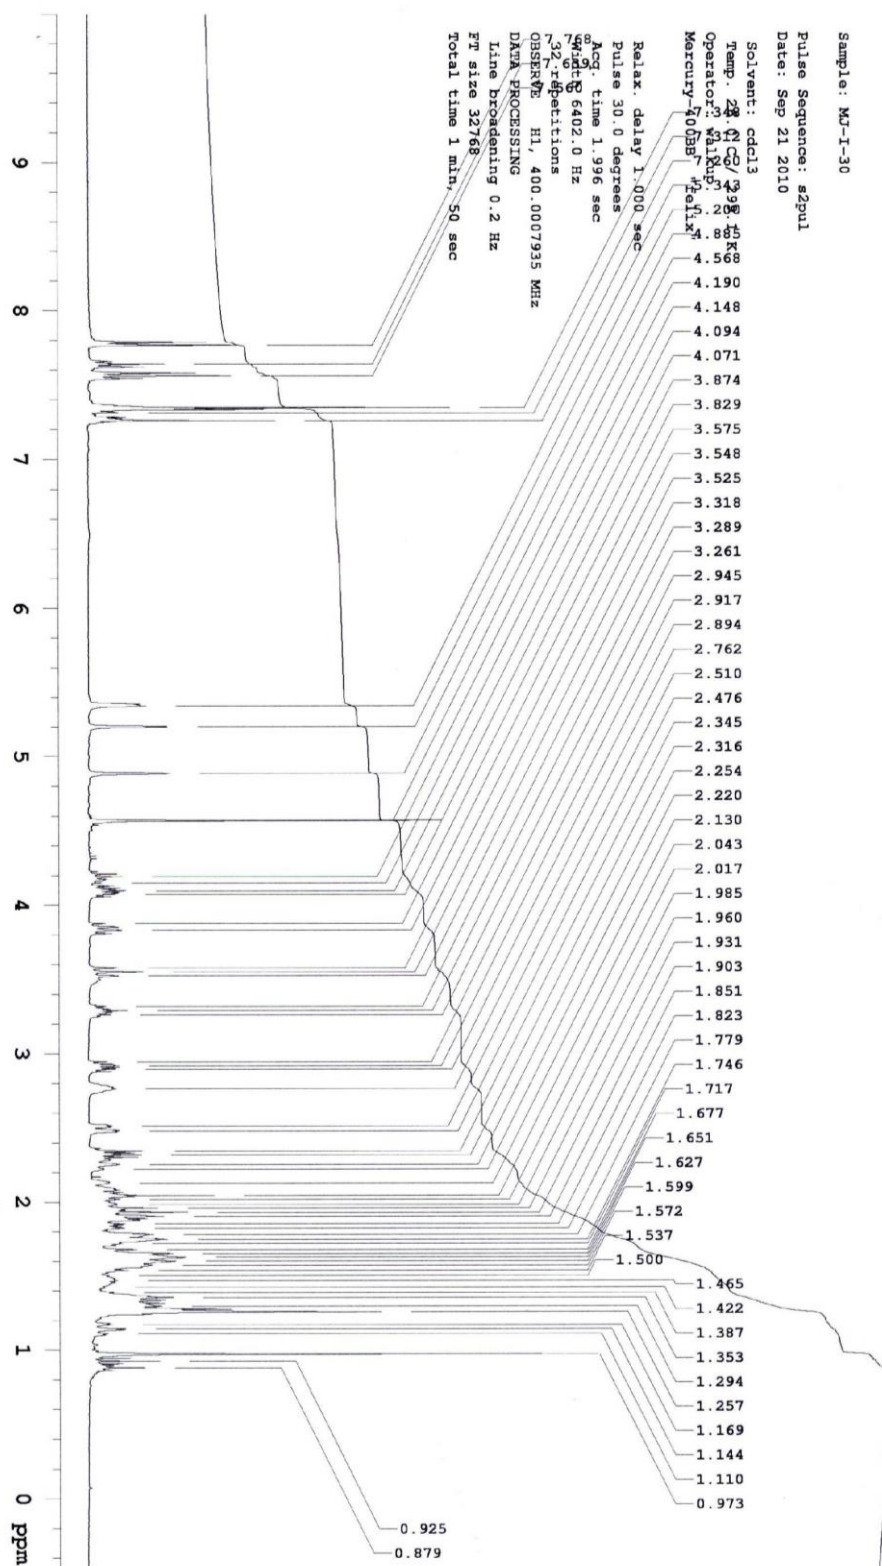



APT (100 MHz, CDCl<sub>3</sub>)

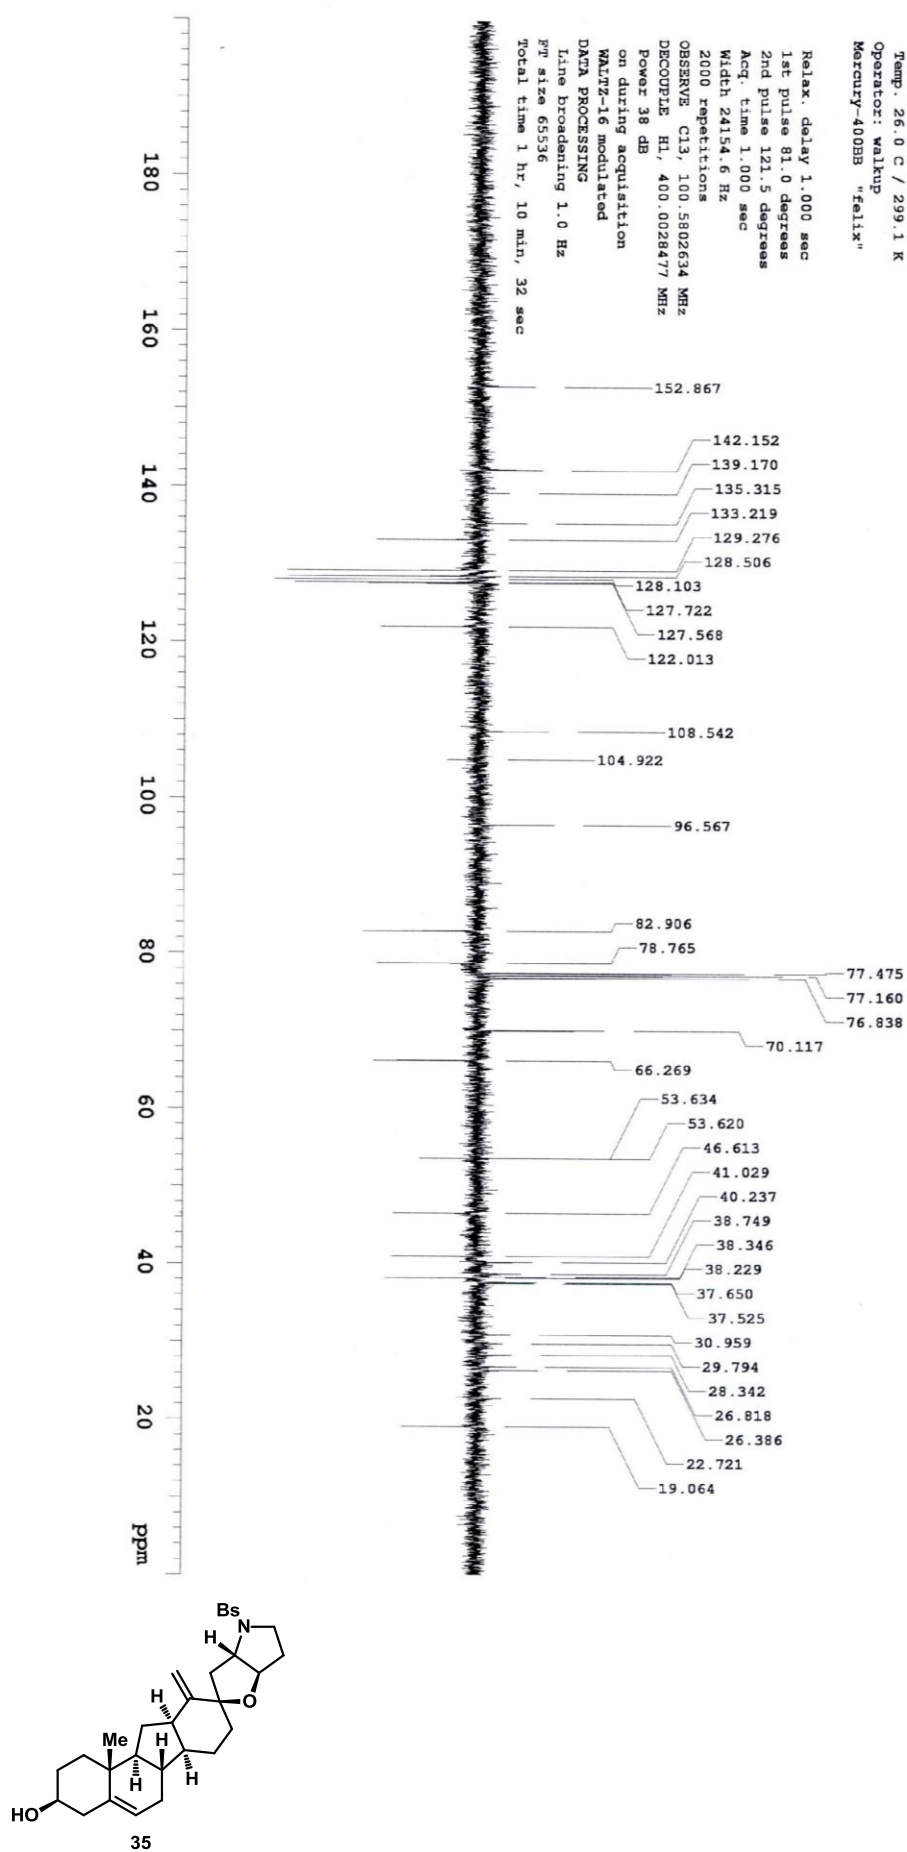



Chemical structure of compound 35, a complex polycyclic molecule. It features a hydroxyl group (HO) and a methyl group (Me) on the left side, and a benzyl-substituted nitrogen atom (Bs-N) on the right side. The structure is labeled 35.

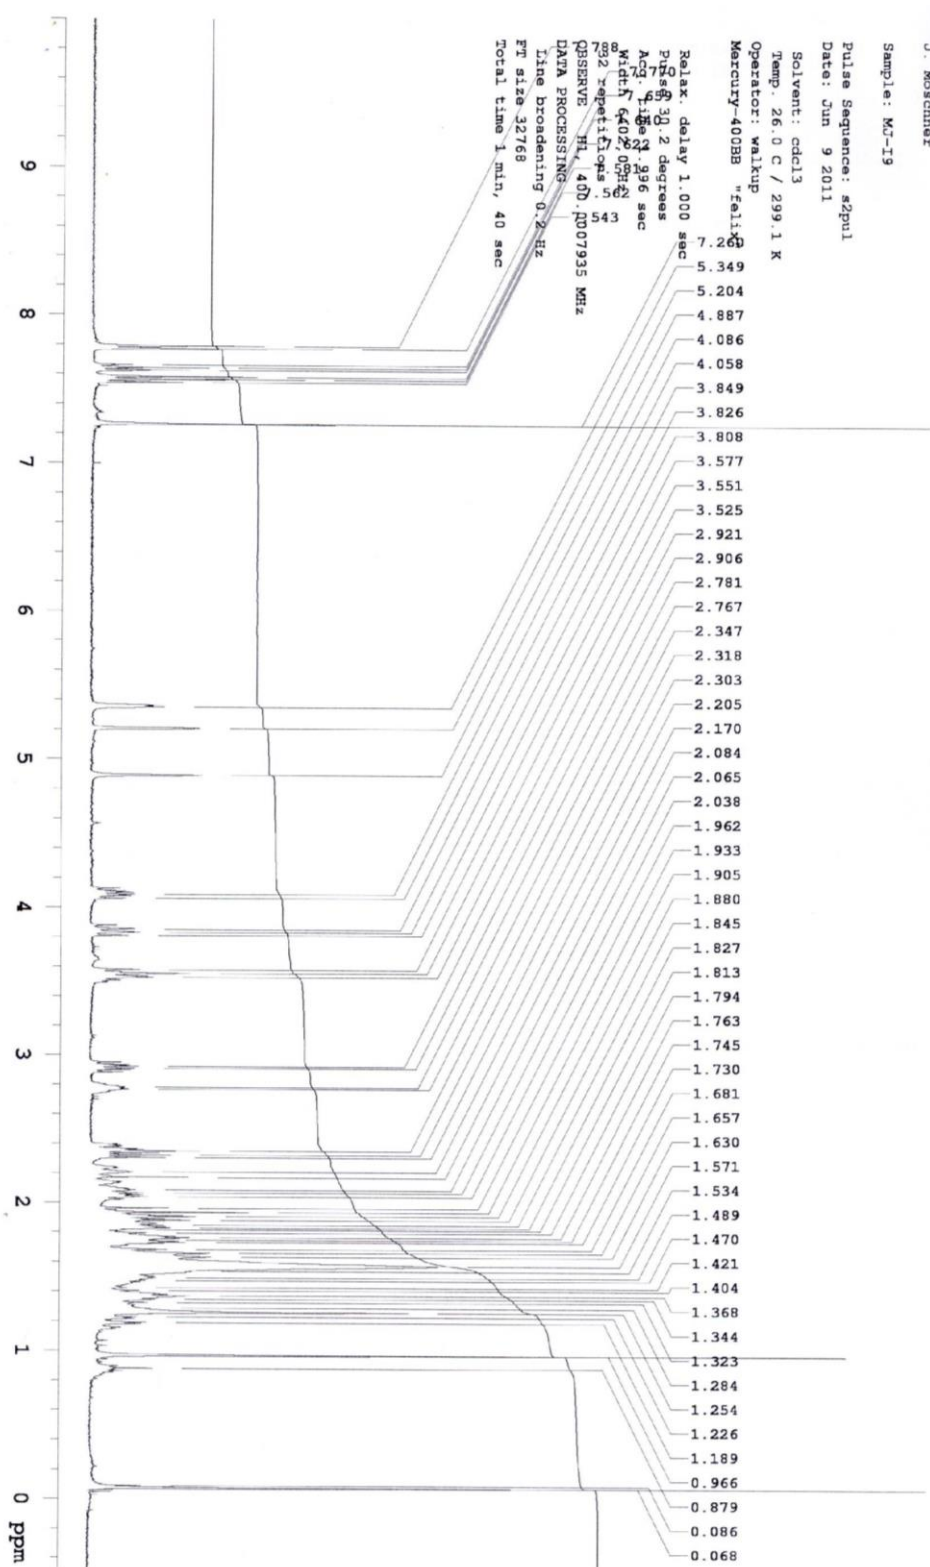

$^{13}\text{C}$  NMR (100 MHz,  $\text{CDCl}_3$ )

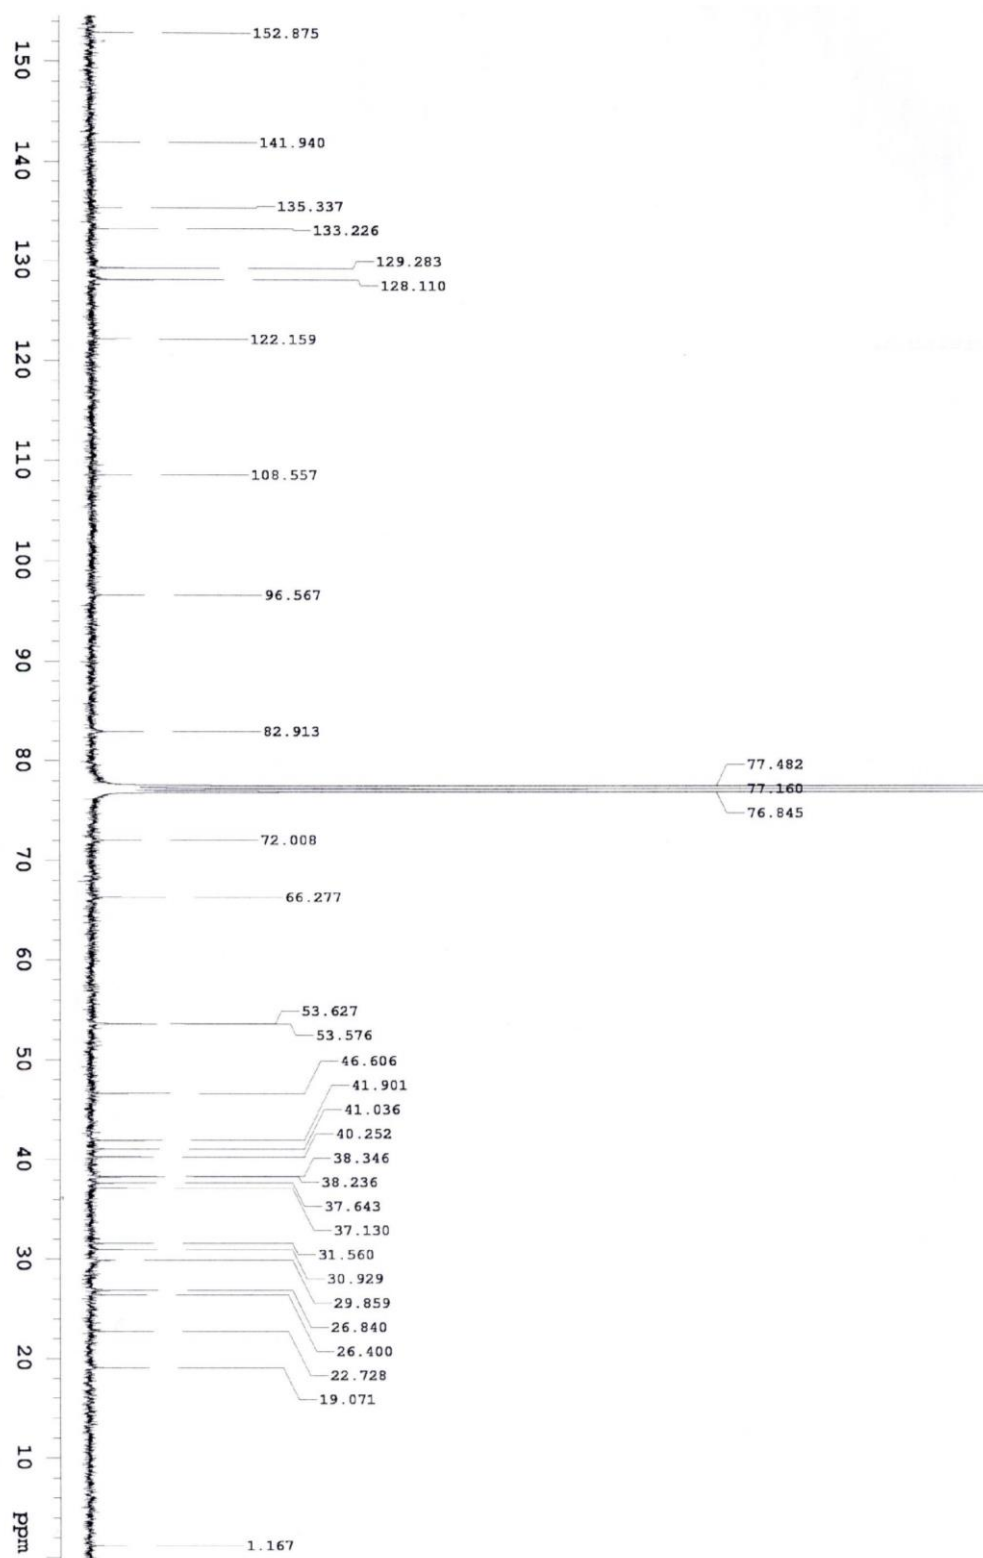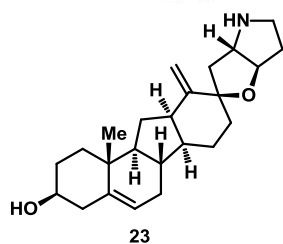

$^1\text{H}$  NMR (400 MHz,  $\text{CDCl}_3$ )



$^{13}\text{C}$  NMR (100 MHz,  $\text{CDCl}_3$ )

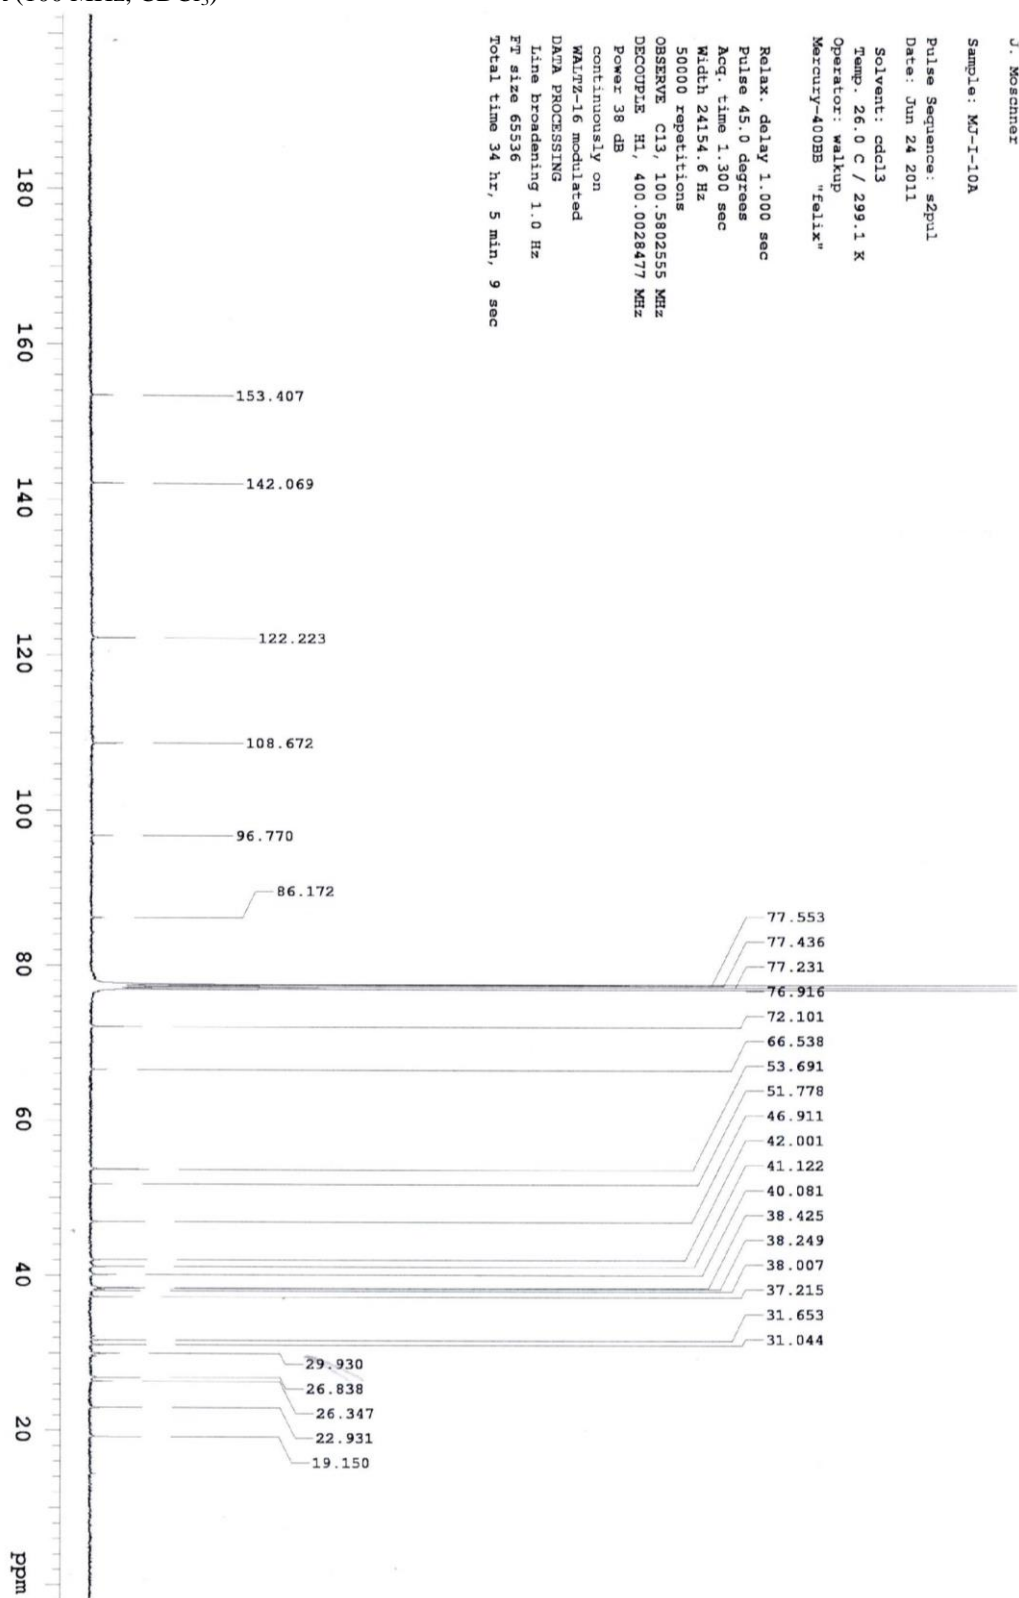

Supplement: Additional file 1 [file 1860-5397-9-267-S1.pdf]
